# Supplementary material for: Vanishing white matter disease expression of truncated EIF2B5 activates induced stress response
Source: eLife. 2020 Dec 10;9:e56319. doi: 10.7554/eLife.56319 (PMC7752137; doi:10.7554/eLife.56319)
Supplement: Figure 1—source data 1. [file elife-56319-fig1-data1.xlsx]

## Sheet: Sheet1
		Experimental Well 1	Experimental Well 2	Experimental Well 3	Control Well 1	Control Well 2	Control Well 3	ΔCt Value (Experimental)			ΔCt Value (Control)				Delta Delta Ct Value			Expression Fold Change				ddCt avg	ddCt stats
24 hpf		Raw Ct Value	Raw Ct Value	Raw Ct Value	Raw Ct Value	Raw Ct Value	Raw Ct Value	ΔCTE 1	ΔCTE 2	ΔCTE 3	ΔCTC 1	ΔCTC 2	ΔCTC 3	ΔCTC avg	ΔΔCt 1	ΔΔCt 2	ΔΔCt 3	2^-ΔΔCt 1	2^-ΔΔCt 2	2^-ΔΔCt 3			ddCt SD	ddCt SEM
Gene	18s	15.5504	15.9227	16.4515	15.5504	15.9227	16.4515	4.46391	4.13204	4.04263	4.46391	4.13204	4.04263	4.21286	0.251051	-0.0808207	-0.170231	0.840284	1.05762	1.12524	24hpf	1.00771	0.148888	0.0859606
	eif2b1	20.0144	20.0548	20.4942	20.0144	20.0548	20.4942
2 dpf		Raw Ct Value	Raw Ct Value	Raw Ct Value	Raw Ct Value	Raw Ct Value	Raw Ct Value	ΔCTE 1	ΔCTE 2	ΔCTE 3	ΔCTC 1	ΔCTC 2	ΔCTC 3	ΔCTC avg	ΔΔCt 1	ΔΔCt 2	ΔΔCt 3	2^-ΔΔCt 1	2^-ΔΔCt 2	2^-ΔΔCt 3			ddCt SD	ddCt SEM
Gene	18s	14.934	15.2526	15.4791	15.5504	15.9227	16.4515	4.612	5.25252	4.59686	4.46391	4.13204	4.04263	4.21286	0.399137	1.03965	0.383994	0.758312	0.486444	0.766313	2dpf	0.670356	0.159323	0.091985
	eif2b1	19.546	20.5051	20.076	20.0144	20.0548	20.4942
3 dpf		Raw Ct Value	Raw Ct Value	Raw Ct Value	Raw Ct Value	Raw Ct Value	Raw Ct Value	ΔCTE 1	ΔCTE 2	ΔCTE 3	ΔCTC 1	ΔCTC 2	ΔCTC 3	ΔCTC avg	ΔΔCt 1	ΔΔCt 2	ΔΔCt 3	2^-ΔΔCt 1	2^-ΔΔCt 2	2^-ΔΔCt 3			ddCt SD	ddCt SEM
Gene	18s	14.8921	15.3383	14.8693	15.5504	15.9227	16.4515	4.54858	4.98283	5.27226	4.46391	4.13204	4.04263	4.21286	0.335713	0.769969	1.0594	0.792392	0.58643	0.479832	3dpf	0.619551	0.158891	0.0917356
	eif2b1	19.4407	20.3211	20.1415	20.0144	20.0548	20.4942
4 dpf		Raw Ct Value	Raw Ct Value	Raw Ct Value	Raw Ct Value	Raw Ct Value	Raw Ct Value	ΔCTE 1	ΔCTE 2	ΔCTE 3	ΔCTC 1	ΔCTC 2	ΔCTC 3	ΔCTC avg	ΔΔCt 1	ΔΔCt 2	ΔΔCt 3	2^-ΔΔCt 1	2^-ΔΔCt 2	2^-ΔΔCt 3			ddCt SD	ddCt SEM
Gene	18s	14.4325	15.2397	15.2078	15.5504	15.9227	16.4515	4.9316	4.63795	5.12442	4.46391	4.13204	4.04263	4.21286	0.718736	0.425091	0.91156	0.607629	0.744792	0.53161	4dpf	0.62801	0.108042	0.0623783
	eif2b1	19.3641	19.8776	20.3323	20.0144	20.0548	20.4942
5 dpf		Raw Ct Value	Raw Ct Value	Raw Ct Value	Raw Ct Value	Raw Ct Value	Raw Ct Value	ΔCTE 1	ΔCTE 2	ΔCTE 3	ΔCTC 1	ΔCTC 2	ΔCTC 3	ΔCTC avg	ΔΔCt 1	ΔΔCt 2	ΔΔCt 3	2^-ΔΔCt 1	2^-ΔΔCt 2	2^-ΔΔCt 3			ddCt SD	ddCt SEM
Gene	18s	15.5841	16.2201	16.006	16.0967	16.4079	16.4198	5.16452	3.44264	4.10656	4.42042	4.07683	4.22092	4.23939	0.925126	-0.796749	-0.132831	0.526635	1.73718	1.09644	5dpf	1.12009	0.60562	0.349655
	eif2b1	20.7486	19.6628	20.1125	20.5171	20.4847	20.6408
6 dpf		Raw Ct Value	Raw Ct Value	Raw Ct Value	Raw Ct Value	Raw Ct Value	Raw Ct Value	ΔCTE 1	ΔCTE 2	ΔCTE 3	ΔCTC 1	ΔCTC 2	ΔCTC 3	ΔCTC avg	ΔΔCt 1	ΔΔCt 2	ΔΔCt 3	2^-ΔΔCt 1	2^-ΔΔCt 2	2^-ΔΔCt 3			ddCt SD	ddCt SEM
Gene	18s	16.0483	16.3563	16.6533	16.0967	16.4079	16.4198	4.21683	2.75149	3.79393	4.42042	4.07683	4.22092	4.23939	-0.022558	-1.4879	-0.445455	1.01576	2.8048	1.36174	6dpf	1.72743	0.948929	0.547865
	eif2b1	20.2651	19.1078	20.4473	20.5171	20.4847	20.6408
7 dpf		Raw Ct Value	Raw Ct Value	Raw Ct Value	Raw Ct Value	Raw Ct Value	Raw Ct Value	ΔCTE 1	ΔCTE 2	ΔCTE 3	ΔCTC 1	ΔCTC 2	ΔCTC 3	ΔCTC avg	ΔΔCt 1	ΔΔCt 2	ΔΔCt 3	2^-ΔΔCt 1	2^-ΔΔCt 2	2^-ΔΔCt 3			ddCt SD	ddCt SEM
Gene	18s	16.2742	16.8882	16.8049	16.0967	16.4079	16.4198	4.22434	2.55498	4.17857	4.42042	4.07683	4.22092	4.23939	-0.01505	-1.68441	-0.060815	1.01049	3.21408	1.04305	7dpf	1.75588	1.26295	0.729165
	eif2b1	20.4985	19.4432	20.9835	20.5171	20.4847	20.6408
		p value
	24hpf	0.391
	2dpf	0.01
	3dpf	0.004
	4dpf	0.013
	5dpf	0.422															24hpf	1.00771			0.0859606
	6dpf	0.017
	7dpf	0.025															2dpf	0.670356			0.091985
																	3dpf	0.619551			0.0917356
																	4dpf	0.62801			0.0623783
																	5dpf	1.12009			0.349655
																	6dpf	1.72743			0.547865
																	7dpf	1.75588			0.729165

## Sheet: Sheet2
		Experimental Well 1	Experimental Well 2	Experimental Well 3	Control Well 1	Control Well 2	Control Well 3	ΔCt Value (Experimental)			ΔCt Value (Control)				Delta Delta Ct Value			Expression Fold Change				ddCt avg	ddCt stats
24 hpf		Raw Ct Value	Raw Ct Value	Raw Ct Value	Raw Ct Value	Raw Ct Value	Raw Ct Value	ΔCTE 1	ΔCTE 2	ΔCTE 3	ΔCTC 1	ΔCTC 2	ΔCTC 3	ΔCTC avg	ΔΔCt 1	ΔΔCt 2	ΔΔCt 3	2^-ΔΔCt 1	2^-ΔΔCt 2	2^-ΔΔCt 3			ddCt SD	ddCt SEM
Gene	18s	15.7692	16.015	15.9761	15.7692	16.015	15.9761	3.90276	3.8926	3.45108	3.90276	3.8926	3.45108	3.74881	0.153944	0.143788	-0.297732	0.89879	0.905139	1.22921	24hpf	1.01105	0.188962	0.109097
	eif2b2	19.672	19.9076	19.4272	19.672	19.9076	19.4272
2 dpf		Raw Ct Value	Raw Ct Value	Raw Ct Value	Raw Ct Value	Raw Ct Value	Raw Ct Value	ΔCTE 1	ΔCTE 2	ΔCTE 3	ΔCTC 1	ΔCTC 2	ΔCTC 3	ΔCTC avg	ΔΔCt 1	ΔΔCt 2	ΔΔCt 3	2^-ΔΔCt 1	2^-ΔΔCt 2	2^-ΔΔCt 3			ddCt SD	ddCt SEM
Gene	18s	16.2384	15.7165	15.7165	15.7692	16.015	15.9761	3.57596	3.84382	3.4354	3.90276	3.8926	3.45108	3.74881	-0.172851	0.0950112	-0.313411	1.12728	0.936265	1.24264	2dpf	1.10206	0.154738	0.0893379
	eif2b2	19.8144	19.5603	19.1519	19.672	19.9076	19.4272
3 dpf		Raw Ct Value	Raw Ct Value	Raw Ct Value	Raw Ct Value	Raw Ct Value	Raw Ct Value	ΔCTE 1	ΔCTE 2	ΔCTE 3	ΔCTC 1	ΔCTC 2	ΔCTC 3	ΔCTC avg	ΔΔCt 1	ΔΔCt 2	ΔΔCt 3	2^-ΔΔCt 1	2^-ΔΔCt 2	2^-ΔΔCt 3			ddCt SD	ddCt SEM
Gene	18s	16.407	16.621	15.8495	15.7692	16.015	15.9761	3.01572	3.2264	3.04833	3.90276	3.8926	3.45108	3.74881	-0.733095	-0.522414	-0.700488	1.6622	1.43636	1.62505	3dpf	1.57454	0.121101	0.0699176
	eif2b2	19.4227	19.8474	18.8978	19.672	19.9076	19.4272
4 dpf		Raw Ct Value	Raw Ct Value	Raw Ct Value	Raw Ct Value	Raw Ct Value	Raw Ct Value	ΔCTE 1	ΔCTE 2	ΔCTE 3	ΔCTC 1	ΔCTC 2	ΔCTC 3	ΔCTC avg	ΔΔCt 1	ΔΔCt 2	ΔΔCt 3	2^-ΔΔCt 1	2^-ΔΔCt 2	2^-ΔΔCt 3			ddCt SD	ddCt SEM
Gene	18s	16.7664	16.9648	16.2149	15.7692	16.015	15.9761	3.52796	2.77323	3.09437	3.90276	3.8926	3.45108	3.74881	-0.220849	-0.975579	-0.654438	1.16542	1.96643	1.574	4dpf	1.56862	0.400533	0.231248
	eif2b2	20.2943	19.738	19.3093	19.672	19.9076	19.4272
5 dpf		Raw Ct Value	Raw Ct Value	Raw Ct Value	Raw Ct Value	Raw Ct Value	Raw Ct Value	ΔCTE 1	ΔCTE 2	ΔCTE 3	ΔCTC 1	ΔCTC 2	ΔCTC 3	ΔCTC avg	ΔΔCt 1	ΔΔCt 2	ΔΔCt 3	2^-ΔΔCt 1	2^-ΔΔCt 2	2^-ΔΔCt 3			ddCt SD	ddCt SEM
Gene	18s	16.9102	18.2288	16.812	16.0919	17.2151	17.5812	4.7083	2.73886	4.04945	3.28757	2.87977	2.51363	2.89366	1.81464	-0.154802	1.1558	0.284275	1.11327	0.448818	5dpf	0.615454	0.4389	0.253399
	eif2b2	21.6185	20.9677	20.8615	19.3795	20.0949	20.0949
6 dpf		Raw Ct Value	Raw Ct Value	Raw Ct Value	Raw Ct Value	Raw Ct Value	Raw Ct Value	ΔCTE 1	ΔCTE 2	ΔCTE 3	ΔCTC 1	ΔCTC 2	ΔCTC 3	ΔCTC avg	ΔΔCt 1	ΔΔCt 2	ΔΔCt 3	2^-ΔΔCt 1	2^-ΔΔCt 2	2^-ΔΔCt 3			ddCt SD	ddCt SEM
Gene	18s	16.5417	17.9017	17.995	16.0919	17.2151	17.5812	4.0445	2.84414	2.22246	3.28757	2.87977	2.51363	2.89366	1.15084	-0.0495173	-0.671198	0.450362	1.03492	1.5924	6dpf	1.02589	0.57107	0.329707
	eif2b2	20.5862	20.7458	20.2174	19.3795	20.0949	20.0949
7 dpf		Raw Ct Value	Raw Ct Value	Raw Ct Value	Raw Ct Value	Raw Ct Value	Raw Ct Value	ΔCTE 1	ΔCTE 2	ΔCTE 3	ΔCTC 1	ΔCTC 2	ΔCTC 3	ΔCTC avg	ΔΔCt 1	ΔΔCt 2	ΔΔCt 3	2^-ΔΔCt 1	2^-ΔΔCt 2	2^-ΔΔCt 3			ddCt SD	ddCt SEM
Gene	18s	17.2675	18.0808	17.9701	16.0919	17.2151	17.5812	3.28888	2.47966	2.55933	3.28757	2.87977	2.51363	2.89366	0.395225	-0.413995	-0.334326	0.760371	1.33237	1.26079	7dpf	1.11784	0.311642	0.179927
	eif2b2	20.5564	20.5605	20.5294	19.3795	20.0949	20.0949
		p value
	1dpf	0.436
	2dpf	0.178
	3dpf	0.005															24hpf	1.01105			0.109097
	4dpf	0.006
	5dpf	0.012															2dpf	1.10206			0.0893379
	6dpf	0.182
	7dpf	0.473															3dpf	1.57454			0.0699176
																	4dpf	1.56862			0.231248
																	5dpf	0.615454			0.253399
																	6dpf	1.02589			0.329707
																	7dpf	1.11784			0.179927

## Sheet: Sheet3
		Experimental Well 1	Experimental Well 2	Experimental Well 3	Control Well 1	Control Well 2	Control Well 3	ΔCt Value (Experimental)			ΔCt Value (Control)				Delta Delta Ct Value			Expression Fold Change				ddCt avg	ddCt stats
24 hpf		Raw Ct Value	Raw Ct Value	Raw Ct Value	Raw Ct Value	Raw Ct Value	Raw Ct Value	ΔCTE 1	ΔCTE 2	ΔCTE 3	ΔCTC 1	ΔCTC 2	ΔCTC 3	ΔCTC avg	ΔΔCt 1	ΔΔCt 2	ΔΔCt 3	2^-ΔΔCt 1	2^-ΔΔCt 2	2^-ΔΔCt 3			ddCt SD	ddCt SEM
Gene	18s	14.4386	14.6864	14.7179	14.4386	14.6864	14.7179	5.05645	5.35856	5.1651	5.05645	5.35856	5.1651	5.19337	-0.136919	0.165192	-0.0282737	1.09955	0.89181	1.01979	24hpf	1.00372	0.104801	0.0605067
	eif2b3	19.4951	20.045	19.883	19.4951	20.045	19.883
2 dpf		Raw Ct Value	Raw Ct Value	Raw Ct Value	Raw Ct Value	Raw Ct Value	Raw Ct Value	ΔCTE 1	ΔCTE 2	ΔCTE 3	ΔCTC 1	ΔCTC 2	ΔCTC 3	ΔCTC avg	ΔΔCt 1	ΔΔCt 2	ΔΔCt 3	2^-ΔΔCt 1	2^-ΔΔCt 2	2^-ΔΔCt 3			ddCt SD	ddCt SEM
Gene	18s	15.4673	16.7552	16.0453	14.4386	14.6864	14.7179	7.53589	4.88774	5.76116	5.05645	5.35856	5.1651	5.19337	2.34252	-0.305634	0.567787	0.197166	1.23596	0.674651	2dpf	0.702593	0.519961	0.3002
	eif2b3	23.0032	21.6429	21.8065	19.4951	20.045	19.883
3 dpf		Raw Ct Value	Raw Ct Value	Raw Ct Value	Raw Ct Value	Raw Ct Value	Raw Ct Value	ΔCTE 1	ΔCTE 2	ΔCTE 3	ΔCTC 1	ΔCTC 2	ΔCTC 3	ΔCTC avg	ΔΔCt 1	ΔΔCt 2	ΔΔCt 3	2^-ΔΔCt 1	2^-ΔΔCt 2	2^-ΔΔCt 3			ddCt SD	ddCt SEM
Gene	18s	15.7668	16.5412	15.7794	14.4386	14.6864	14.7179	6.97647	5.18351	5.69868	5.05645	5.35856	5.1651	5.19337	1.7831	-0.00986267	0.505308	0.290558	1.00686	0.70451	3dpf	0.667309	0.359597	0.207613
	eif2b3	22.7433	21.7247	21.4781	19.4951	20.045	19.883
4 dpf		Raw Ct Value	Raw Ct Value	Raw Ct Value	Raw Ct Value	Raw Ct Value	Raw Ct Value	ΔCTE 1	ΔCTE 2	ΔCTE 3	ΔCTC 1	ΔCTC 2	ΔCTC 3	ΔCTC avg	ΔΔCt 1	ΔΔCt 2	ΔΔCt 3	2^-ΔΔCt 1	2^-ΔΔCt 2	2^-ΔΔCt 3			ddCt SD	ddCt SEM
Gene	18s	15.7455	16.2917	16.2472	14.4386	14.6864	14.7179	7.74622	4.15207	6.10654	5.05645	5.35856	5.1651	5.19337	2.55285	-1.0413	0.91317	0.170418	2.05808	0.531017	4dpf	0.919838	1.0021	0.578562
	eif2b3	23.4918	20.4437	22.3537	19.4951	20.045	19.883
5 dpf		Raw Ct Value	Raw Ct Value	Raw Ct Value	Raw Ct Value	Raw Ct Value	Raw Ct Value	ΔCTE 1	ΔCTE 2	ΔCTE 3	ΔCTC 1	ΔCTC 2	ΔCTC 3	ΔCTC avg	ΔΔCt 1	ΔΔCt 2	ΔΔCt 3	2^-ΔΔCt 1	2^-ΔΔCt 2	2^-ΔΔCt 3			ddCt SD	ddCt SEM
Gene	18s	16.8003	17.448	17.0944	14.977	15.815	15.5611	6.27948	5.79412	5.56379	4.73471	4.37651	5.07334	4.72819	1.5513	1.06594	0.835602	0.341204	0.477663	0.560349	5dpf	0.459738	0.110667	0.0638935
	eif2b3	23.0798	23.2422	22.6582	19.7117	20.1915	20.6344
6 dpf		Raw Ct Value	Raw Ct Value	Raw Ct Value	Raw Ct Value	Raw Ct Value	Raw Ct Value	ΔCTE 1	ΔCTE 2	ΔCTE 3	ΔCTC 1	ΔCTC 2	ΔCTC 3	ΔCTC avg	ΔΔCt 1	ΔΔCt 2	ΔΔCt 3	2^-ΔΔCt 1	2^-ΔΔCt 2	2^-ΔΔCt 3			ddCt SD	ddCt SEM
Gene	18s	16.9834	17.6257	17.7102	14.977	15.815	15.5611	5.80804	5.20802	5.39186	4.73471	4.37651	5.07334	4.72819	1.07985	0.479837	0.663669	0.473077	0.717059	0.631271	6dpf	0.607136	0.123768	0.0714577
	eif2b3	22.7914	22.8337	23.102	19.7117	20.1915	20.6344
7 dpf		Raw Ct Value	Raw Ct Value	Raw Ct Value	Raw Ct Value	Raw Ct Value	Raw Ct Value	ΔCTE 1	ΔCTE 2	ΔCTE 3	ΔCTC 1	ΔCTC 2	ΔCTC 3	ΔCTC avg	ΔΔCt 1	ΔΔCt 2	ΔΔCt 3	2^-ΔΔCt 1	2^-ΔΔCt 2	2^-ΔΔCt 3			ddCt SD	ddCt SEM
Gene	18s	17.5339	17.5135	17.8253	14.977	15.815	15.5611	6.27912	5.63583	5.58228	4.73471	4.37651	5.07334	4.72819	1.55093	0.907643	0.854097	0.34129	0.533055	0.553211	7dpf	0.475852	0.116969	0.0675321
	eif2b3	23.813	23.1493	23.4075	19.7117	20.1915	20.6344
		p value
	1dpf	0.424
	2dpf	0.005							24hpf	1.00372		0.0605067
	3dpf	0.002
	4dpf	0.258							2dpf	0.702593		0.3002
	5dpf	0.0003
	6dpf	0.004							3dpf	0.667309		0.207613
	7dpf	0.0009
									4dpf	0.919838		0.578562
									5dpf	0.459738		0.0638935
									6dpf	0.607136		0.0714577
									7dpf	0.475852		0.0675321

## Sheet: Sheet4
		Experimental Well 1	Experimental Well 2	Experimental Well 3	Control Well 1	Control Well 2	Control Well 3	ΔCt Value (Experimental)			ΔCt Value (Control)				Delta Delta Ct Value			Expression Fold Change				ddCt avg	ddCt stats
24 hpf		Raw Ct Value	Raw Ct Value	Raw Ct Value	Raw Ct Value	Raw Ct Value	Raw Ct Value	ΔCTE 1	ΔCTE 2	ΔCTE 3	ΔCTC 1	ΔCTC 2	ΔCTC 3	ΔCTC avg	ΔΔCt 1	ΔΔCt 2	ΔΔCt 3	2^-ΔΔCt 1	2^-ΔΔCt 2	2^-ΔΔCt 3			ddCt SD	ddCt SEM
Gene	18s	14.5458	14.7867	14.5157	14.5458	14.7867	14.5157	6.40011	5.76186	5.94412	6.40011	5.76186	5.94412	6.03536	0.364745	-0.273502	-0.091243	0.776606	1.20874	1.06529	24hpf	1.01688	0.220096	0.127072
	eif2b4	20.9459	20.5486	20.4598	20.9459	20.5486	20.4598
2 dpf		Raw Ct Value	Raw Ct Value	Raw Ct Value	Raw Ct Value	Raw Ct Value	Raw Ct Value	ΔCTE 1	ΔCTE 2	ΔCTE 3	ΔCTC 1	ΔCTC 2	ΔCTC 3	ΔCTC avg	ΔΔCt 1	ΔΔCt 2	ΔΔCt 3	2^-ΔΔCt 1	2^-ΔΔCt 2	2^-ΔΔCt 3			ddCt SD	ddCt SEM
Gene	18s	15.9566	17.3273	16.2591	14.5458	14.7867	14.5157	6.92829	5.55785	6.90343	6.40011	5.76186	5.94412	6.03536	0.892924	-0.477517	0.868065	0.538522	1.39235	0.547881	2dpf	0.826249	0.490276	0.283061
	eif2b4	22.8849	22.8852	23.1626	20.9459	20.5486	20.4598
3 dpf		Raw Ct Value	Raw Ct Value	Raw Ct Value	Raw Ct Value	Raw Ct Value	Raw Ct Value	ΔCTE 1	ΔCTE 2	ΔCTE 3	ΔCTC 1	ΔCTC 2	ΔCTC 3	ΔCTC avg	ΔΔCt 1	ΔΔCt 2	ΔΔCt 3	2^-ΔΔCt 1	2^-ΔΔCt 2	2^-ΔΔCt 3			ddCt SD	ddCt SEM
Gene	18s	16.0506	17.0103	16.3336	14.5458	14.7867	14.5157	6.84134	6.18935	6.33782	6.40011	5.76186	5.94412	6.03536	0.805974	0.153991	0.302452	0.571976	0.898761	0.810873	3dpf	0.760537	0.169108	0.0976344
	eif2b4	22.8919	23.1996	22.6714	20.9459	20.5486	20.4598
4 dpf		Raw Ct Value	Raw Ct Value	Raw Ct Value	Raw Ct Value	Raw Ct Value	Raw Ct Value	ΔCTE 1	ΔCTE 2	ΔCTE 3	ΔCTC 1	ΔCTC 2	ΔCTC 3	ΔCTC avg	ΔΔCt 1	ΔΔCt 2	ΔΔCt 3	2^-ΔΔCt 1	2^-ΔΔCt 2	2^-ΔΔCt 3			ddCt SD	ddCt SEM
Gene	18s	16.4048	17.5519	16.8412	14.5458	14.7867	14.5157	6.65545	4.93408	6.11607	6.40011	5.76186	5.94412	6.03536	0.620088	-1.10128	0.080709	0.650631	2.14545	0.945593	4dpf	1.24723	0.791745	0.457114
	eif2b4	23.0603	22.486	22.9573	20.9459	20.5486	20.4598
5 dpf		Raw Ct Value	Raw Ct Value	Raw Ct Value	Raw Ct Value	Raw Ct Value	Raw Ct Value	ΔCTE 1	ΔCTE 2	ΔCTE 3	ΔCTC 1	ΔCTC 2	ΔCTC 3	ΔCTC avg	ΔΔCt 1	ΔΔCt 2	ΔΔCt 3	2^-ΔΔCt 1	2^-ΔΔCt 2	2^-ΔΔCt 3			ddCt SD	ddCt SEM
Gene	18s	16.9333	17.9257	17.2498	14.9781	15.1131	15.149	7.48883	6.77388	6.84838	6.29671	6.47331	6.08559	6.28521	1.20363	0.488675	0.563178	0.434183	0.712679	0.67681	5dpf	0.607891	0.151501	0.087469
	eif2b4	24.4221	24.6996	24.0982	21.2749	21.5864	21.2345
6 dpf		Raw Ct Value	Raw Ct Value	Raw Ct Value	Raw Ct Value	Raw Ct Value	Raw Ct Value	ΔCTE 1	ΔCTE 2	ΔCTE 3	ΔCTC 1	ΔCTC 2	ΔCTC 3	ΔCTC avg	ΔΔCt 1	ΔΔCt 2	ΔΔCt 3	2^-ΔΔCt 1	2^-ΔΔCt 2	2^-ΔΔCt 3			ddCt SD	ddCt SEM
Gene	18s	17.1053	17.1053	17.6388	14.9781	15.1131	15.149	6.71808	6.4983	6.16694	6.29671	6.47331	6.08559	6.28521	0.432872	0.213096	-0.118263	0.740786	0.862684	1.08543	6dpf	0.896299	0.174763	0.100899
	eif2b4	23.8234	23.6036	23.8058	21.2749	21.5864	21.2345
7 dpf		Raw Ct Value	Raw Ct Value	Raw Ct Value	Raw Ct Value	Raw Ct Value	Raw Ct Value	ΔCTE 1	ΔCTE 2	ΔCTE 3	ΔCTC 1	ΔCTC 2	ΔCTC 3	ΔCTC avg	ΔΔCt 1	ΔΔCt 2	ΔΔCt 3	2^-ΔΔCt 1	2^-ΔΔCt 2	2^-ΔΔCt 3			ddCt SD	ddCt SEM
Gene	18s	17.6568	17.3704	17.7126	14.9781	15.1131	15.149	5.3269	5.31998	5.24881	6.29671	6.47331	6.08559	6.28521	-0.958302	-0.965221	-1.03639	1.94302	1.95236	2.05109	7dpf	1.98216	0.059881	0.0345723
	eif2b4	22.9837	22.6904	22.9614	21.2749	21.5864	21.2345
		p value
	1dpf	0.434
	2dpf	0.025															24hpf	1.01688			0.127072
	3dpf	0.016
	4dpf	0.327															2dpf	0.826249			0.283061
	5dpf	0.001
	6dpf	0.059															3dpf	0.760537			0.0976344
	7dpf	2e-06
																	4dpf	1.24723			0.457114
																	5dpf	0.607891			0.087469
																	6dpf	0.896299			0.100899
																	7dpf	1.98216			0.0345723

## Sheet: Sheet5
		Experimental Well 1	Experimental Well 2	Experimental Well 3	Control Well 1	Control Well 2	Control Well 3	ΔCt Value (Experimental)			ΔCt Value (Control)				Delta Delta Ct Value			Expression Fold Change				ddCt avg	ddCt stats
24 hpf		Raw Ct Value	Raw Ct Value	Raw Ct Value	Raw Ct Value	Raw Ct Value	Raw Ct Value	ΔCTE 1	ΔCTE 2	ΔCTE 3	ΔCTC 1	ΔCTC 2	ΔCTC 3	ΔCTC avg	ΔΔCt 1	ΔΔCt 2	ΔΔCt 3	2^-ΔΔCt 1	2^-ΔΔCt 2	2^-ΔΔCt 3			ddCt SD	ddCt SEM
Gene	18s	14.8074	15.844	15.8338	14.8074	15.844	15.8338	3.43469	2.53866	2.46279	3.43469	2.53866	2.46279	2.81205	0.622647	-0.273391	-0.349257	0.649478	1.20865	1.2739	24hpf	1.04401	0.343228	0.198163
	eif2b5	18.242	18.3826	18.2966	18.242	18.3826	18.2966
2 dpf		Raw Ct Value	Raw Ct Value	Raw Ct Value	Raw Ct Value	Raw Ct Value	Raw Ct Value	ΔCTE 1	ΔCTE 2	ΔCTE 3	ΔCTC 1	ΔCTC 2	ΔCTC 3	ΔCTC avg	ΔΔCt 1	ΔΔCt 2	ΔΔCt 3	2^-ΔΔCt 1	2^-ΔΔCt 2	2^-ΔΔCt 3			ddCt SD	ddCt SEM
Gene	18s	15.4509	16.2741	15.7049	14.8074	15.844	15.8338	3.46025	2.03997	3.06443	3.43469	2.53866	2.46279	2.81205	0.648202	-0.772082	0.252382	0.638075	1.70773	0.839509	2dpf	1.06177	0.568412	0.328173
	eif2b5	18.9111	18.3141	18.7694	18.242	18.3826	18.2966
3 dpf		Raw Ct Value	Raw Ct Value	Raw Ct Value	Raw Ct Value	Raw Ct Value	Raw Ct Value	ΔCTE 1	ΔCTE 2	ΔCTE 3	ΔCTC 1	ΔCTC 2	ΔCTC 3	ΔCTC avg	ΔΔCt 1	ΔΔCt 2	ΔΔCt 3	2^-ΔΔCt 1	2^-ΔΔCt 2	2^-ΔΔCt 3			ddCt SD	ddCt SEM
Gene	18s	15.3421	16.4704	16.0305	14.8074	15.844	15.8338	3.12762	1.89434	2.24345	3.43469	2.53866	2.46279	2.81205	0.315568	-0.917703	-0.568597	0.803534	1.8891	1.48308	3dpf	1.39191	0.548498	0.316676
	eif2b5	18.4697	18.3647	18.274	18.242	18.3826	18.2966
4 dpf		Raw Ct Value	Raw Ct Value	Raw Ct Value	Raw Ct Value	Raw Ct Value	Raw Ct Value	ΔCTE 1	ΔCTE 2	ΔCTE 3	ΔCTC 1	ΔCTC 2	ΔCTC 3	ΔCTC avg	ΔΔCt 1	ΔΔCt 2	ΔΔCt 3	2^-ΔΔCt 1	2^-ΔΔCt 2	2^-ΔΔCt 3			ddCt SD	ddCt SEM
Gene	18s	16.3808	16.6721	16.3078	14.8074	15.844	15.8338	2.95948	1.30183	2.64669	3.43469	2.53866	2.46279	2.81205	0.147431	-1.51022	-0.165354	0.902857	2.84853	1.12144	4dpf	1.62427	1.06585	0.615369
	eif2b5	19.3403	17.974	18.9545	18.242	18.3826	18.2966
5 dpf		Raw Ct Value	Raw Ct Value	Raw Ct Value	Raw Ct Value	Raw Ct Value	Raw Ct Value	ΔCTE 1	ΔCTE 2	ΔCTE 3	ΔCTC 1	ΔCTC 2	ΔCTC 3	ΔCTC avg	ΔΔCt 1	ΔΔCt 2	ΔΔCt 3	2^-ΔΔCt 1	2^-ΔΔCt 2	2^-ΔΔCt 3			ddCt SD	ddCt SEM
Gene	18s	16.7086	16.8219	16.5709	15.8361	17.1211	16.7314	4.12924	3.83306	3.60607	3.80466	3.04895	3.33269	3.39543	0.733809	0.437627	0.210637	0.601314	0.738348	0.864155	5dpf	0.734606	0.131461	0.0758988
	eif2b5	20.8379	20.6549	20.177	19.6407	20.1701	20.0641
6 dpf		Raw Ct Value	Raw Ct Value	Raw Ct Value	Raw Ct Value	Raw Ct Value	Raw Ct Value	ΔCTE 1	ΔCTE 2	ΔCTE 3	ΔCTC 1	ΔCTC 2	ΔCTC 3	ΔCTC avg	ΔΔCt 1	ΔΔCt 2	ΔΔCt 3	2^-ΔΔCt 1	2^-ΔΔCt 2	2^-ΔΔCt 3			ddCt SD	ddCt SEM
Gene	18s	16.9912	16.8746	17.0734	15.8361	17.1211	16.7314	3.58214	3.17549	3.32711	3.80466	3.04895	3.33269	3.39543	0.186702	-0.219945	-0.0683207	0.878612	1.16469	1.0485	6dpf	1.0306	0.143876	0.0830668
	eif2b5	20.5733	20.0501	20.4005	19.6407	20.1701	20.0641
7 dpf		Raw Ct Value	Raw Ct Value	Raw Ct Value	Raw Ct Value	Raw Ct Value	Raw Ct Value	ΔCTE 1	ΔCTE 2	ΔCTE 3	ΔCTC 1	ΔCTC 2	ΔCTC 3	ΔCTC avg	ΔΔCt 1	ΔΔCt 2	ΔΔCt 3	2^-ΔΔCt 1	2^-ΔΔCt 2	2^-ΔΔCt 3			ddCt SD	ddCt SEM
Gene	18s	17.5771	17.132	17.9153	15.8361	17.1211	16.7314	2.46939	3.11157	2.09162	3.80466	3.04895	3.33269	3.39543	-0.92604	-0.283863	-1.30382	1.90005	1.21745	2.46881	7dpf	1.8621	0.626542	0.361734
	eif2b5	20.0465	20.2435	20.007	19.6407	20.1701	20.0641
