# Supplementary material for: Vanishing white matter disease expression of truncated EIF2B5 activates induced stress response
Source: eLife. 2020 Dec 10;9:e56319. doi: 10.7554/eLife.56319 (PMC7752137; doi:10.7554/eLife.56319)
Supplement: Figure 1—source data 2. [file elife-56319-fig1-data2.xlsx]

## Sheet: eif2b1
	Expression Fold Change				Ordinary one-way ANOVA											Expression Fold Change								Descriptive Statistics
																1dpf	2dpf	3dpf	4dpf	5dpf	6dpf	7dpf			1	2	3	4	5	6	7
	eif2b1				Number of families	1										0.840284	0.758312	0.792392	0.607629	0.526635	1.01576	1.01049		Number of values	3	3	3	3	3	3	3
1dpf	0.840284	1.05762	1.12524		Number of comparisons per family	21										1.05762	0.486444	0.58643	0.744792	1.73718	2.8048	3.21408
2dpf	0.758312	0.486444	0.766313		Alpha	0.05										1.12524	0.766313	0.479832	0.53161	1.09644	1.36174	1.04306		Minimum	0.8403	0.4864	0.4798	0.5316	0.5266	1.016	1.01
3dpf	0.792392	0.58643	0.479832																					Maximum	1.125	0.7663	0.7924	0.7448	1.737	2.805	3.214
4dpf	0.607629	0.744792	0.53161		Tukey's multiple comparisons test	Mean Diff.	95.00% CI of diff.	Significant?	Summary															Range	0.285	0.2799	0.3126	0.2132	1.211	1.789	2.204
5dpf	0.526635	1.73718	1.09644		1dpf vs. 2dpf	0.3374	-1.472 to 2.146	No	ns		A-B
6dpf	1.01576	2.8048	1.36174		1dpf vs. 3dpf	0.3882	-1.421 to 2.197	No	ns		A-C													Mean	1.008	0.6704	0.6196	0.628	1.12	1.727	1.756
7dpf	1.01049	3.21408	1.04306		1dpf vs. 4dpf	0.3797	-1.429 to 2.189	No	ns		A-D													Std. Deviation	0.1489	0.1593	0.1589	0.108	0.6056	0.9489	1.263
					1dpf vs. 5dpf	-0.1124	-1.921 to 1.697	No	ns		A-E													Std. Error of Mean	0.08596	0.09198	0.09174	0.06238	0.3497	0.5479	0.7292
					1dpf vs. 6dpf	-0.7197	-2.529 to 1.089	No	ns		A-F
					1dpf vs. 7dpf	-0.7482	-2.557 to 1.061	No	ns		A-G													Lower 95% CI of mean	0.6379	0.2746	0.2248	0.3596	-0.3844	-0.6298	-1.381
					2dpf vs. 3dpf	0.0508	-1.758 to 1.860	No	ns		B-C													Upper 95% CI of mean	1.378	1.066	1.014	0.8964	2.625	4.085	4.893
					2dpf vs. 4dpf	0.04235	-1.767 to 1.851	No	ns		B-D
					2dpf vs. 5dpf	-0.4497	-2.259 to 1.359	No	ns		B-E
					2dpf vs. 6dpf	-1.057	-2.866 to 0.7518	No	ns		B-F
					2dpf vs. 7dpf	-1.086	-2.894 to 0.7234	No	ns		B-G
					3dpf vs. 4dpf	-0.008459	-1.817 to 1.800	No	ns		C-D
					3dpf vs. 5dpf	-0.5005	-2.309 to 1.308	No	ns		C-E
					3dpf vs. 6dpf	-1.108	-2.917 to 0.7010	No	ns		C-F
					3dpf vs. 7dpf	-1.136	-2.945 to 0.6726	No	ns		C-G
					4dpf vs. 5dpf	-0.4921	-2.301 to 1.317	No	ns		D-E
					4dpf vs. 6dpf	-1.099	-2.908 to 0.7095	No	ns		D-F
					4dpf vs. 7dpf	-1.128	-2.937 to 0.6810	No	ns		D-G
					5dpf vs. 6dpf	-0.6073	-2.416 to 1.202	No	ns		E-F
					5dpf vs. 7dpf	-0.6358	-2.445 to 1.173	No	ns		E-G
					6dpf vs. 7dpf	-0.02844	-1.837 to 1.780	No	ns		F-G
					Test details	Mean 1	Mean 2	Mean Diff.	SE of diff.	n1	n2	q	DF
					1dpf vs. 2dpf	1.008	0.6704	0.3374	0.5298	3	3	0.9006	14
					1dpf vs. 3dpf	1.008	0.6196	0.3882	0.5298	3	3	1.036	14
					1dpf vs. 4dpf	1.008	0.628	0.3797	0.5298	3	3	1.014	14
					1dpf vs. 5dpf	1.008	1.12	-0.1124	0.5298	3	3	0.3	14
					1dpf vs. 6dpf	1.008	1.727	-0.7197	0.5298	3	3	1.921	14
					1dpf vs. 7dpf	1.008	1.756	-0.7482	0.5298	3	3	1.997	14
					2dpf vs. 3dpf	0.6704	0.6196	0.0508	0.5298	3	3	0.1356	14
					2dpf vs. 4dpf	0.6704	0.628	0.04235	0.5298	3	3	0.113	14
					2dpf vs. 5dpf	0.6704	1.12	-0.4497	0.5298	3	3	1.201	14
					2dpf vs. 6dpf	0.6704	1.727	-1.057	0.5298	3	3	2.822	14
					2dpf vs. 7dpf	0.6704	1.756	-1.086	0.5298	3	3	2.898	14
					3dpf vs. 4dpf	0.6196	0.628	-0.008459	0.5298	3	3	0.02258	14
					3dpf vs. 5dpf	0.6196	1.12	-0.5005	0.5298	3	3	1.336	14
					3dpf vs. 6dpf	0.6196	1.727	-1.108	0.5298	3	3	2.958	14
					3dpf vs. 7dpf	0.6196	1.756	-1.136	0.5298	3	3	3.033	14
					4dpf vs. 5dpf	0.628	1.12	-0.4921	0.5298	3	3	1.314	14
					4dpf vs. 6dpf	0.628	1.727	-1.099	0.5298	3	3	2.935	14
					4dpf vs. 7dpf	0.628	1.756	-1.128	0.5298	3	3	3.011	14
					5dpf vs. 6dpf	1.12	1.727	-0.6073	0.5298	3	3	1.621	14
					5dpf vs. 7dpf	1.12	1.756	-0.6358	0.5298	3	3	1.697	14
					6dpf vs. 7dpf	1.727	1.756	-0.02844	0.5298	3	3	0.07592	14

## Sheet: eif2b2
	Expression Fold Change				Ordinary one-way ANOVA											Expression Fold Change								Descriptive Statistics
																1dpf	2dpf	3dpf	4dpf	5dpf	6dpf	7dpf			1	2	3	4	5	6	7
					Number of families	1										0.89879	1.12728	1.6622	1.16542	0.284275	0.450362	0.760371		Number of values	3	3	3	3	3	3	3
	eif2b2				Number of comparisons per family	21										0.905139	0.936265	1.43636	1.96643	1.11327	1.03492	1.33237
1dpf	0.89879	0.905139	1.22921		Alpha	0.05										1.22921	1.24264	1.62505	1.574	0.448818	1.5924	1.26079		Minimum	0.8988	0.9363	1.436	1.165	0.2843	0.4504	0.7604
2dpf	1.12728	0.936265	1.24264																					Maximum	1.229	1.243	1.662	1.966	1.113	1.592	1.332
3dpf	1.6622	1.43636	1.62505		Tukey's multiple comparisons test	Mean Diff.	95.00% CI of diff.	Significant?	Summary															Range	0.3304	0.3064	0.2258	0.801	0.829	1.142	0.572
4dpf	1.16542	1.96643	1.574		1dpf vs. 2dpf	-0.09102	-1.063 to 0.8809	No	ns		A-B
5dpf	0.284275	1.11327	0.448818		1dpf vs. 3dpf	-0.5635	-1.535 to 0.4084	No	ns		A-C													Mean	1.011	1.102	1.575	1.569	0.6155	1.026	1.118
6dpf	0.450362	1.03492	1.5924		1dpf vs. 4dpf	-0.5576	-1.529 to 0.4143	No	ns		A-D													Std. Deviation	0.189	0.1547	0.1211	0.4005	0.4389	0.5711	0.3116
7dpf	0.760371	1.33237	1.26079		1dpf vs. 5dpf	0.3956	-0.5763 to 1.367	No	ns		A-E													Std. Error of Mean	0.1091	0.08934	0.06992	0.2312	0.2534	0.3297	0.1799
					1dpf vs. 6dpf	-0.01485	-0.9867 to 0.9570	No	ns		A-F
					1dpf vs. 7dpf	-0.1068	-1.079 to 0.8651	No	ns		A-G													Lower 95% CI of mean	0.5416	0.7177	1.274	0.5736	-0.4748	-0.3927	0.3437
					2dpf vs. 3dpf	-0.4725	-1.444 to 0.4994	No	ns		B-C													Upper 95% CI of mean	1.48	1.486	1.875	2.564	1.706	2.445	1.892
					2dpf vs. 4dpf	-0.4666	-1.438 to 0.5053	No	ns		B-D
					2dpf vs. 5dpf	0.4866	-0.4853 to 1.458	No	ns		B-E
					2dpf vs. 6dpf	0.07617	-0.8957 to 1.048	No	ns		B-F
					2dpf vs. 7dpf	-0.01578	-0.9877 to 0.9561	No	ns		B-G
					3dpf vs. 4dpf	0.00592	-0.9660 to 0.9778	No	ns		C-D
					3dpf vs. 5dpf	0.9591	-0.01279 to 1.931	No	ns		C-E
					3dpf vs. 6dpf	0.5486	-0.4232 to 1.521	No	ns		C-F
					3dpf vs. 7dpf	0.4567	-0.5152 to 1.429	No	ns		C-G
					4dpf vs. 5dpf	0.9532	-0.01871 to 1.925	No	ns		D-E
					4dpf vs. 6dpf	0.5427	-0.4292 to 1.515	No	ns		D-F
					4dpf vs. 7dpf	0.4508	-0.5211 to 1.423	No	ns		D-G
					5dpf vs. 6dpf	-0.4104	-1.382 to 0.5614	No	ns		E-F
					5dpf vs. 7dpf	-0.5024	-1.474 to 0.4695	No	ns		E-G
					6dpf vs. 7dpf	-0.09195	-1.064 to 0.8799	No	ns		F-G
					Test details	Mean 1	Mean 2	Mean Diff.	SE of diff.	n1	n2	q	DF
					1dpf vs. 2dpf	1.011	1.102	-0.09102	0.2846	3	3	0.4522	14
					1dpf vs. 3dpf	1.011	1.575	-0.5635	0.2846	3	3	2.8	14
					1dpf vs. 4dpf	1.011	1.569	-0.5576	0.2846	3	3	2.77	14
					1dpf vs. 5dpf	1.011	0.6155	0.3956	0.2846	3	3	1.966	14
					1dpf vs. 6dpf	1.011	1.026	-0.01485	0.2846	3	3	0.07376	14
					1dpf vs. 7dpf	1.011	1.118	-0.1068	0.2846	3	3	0.5306	14
					2dpf vs. 3dpf	1.102	1.575	-0.4725	0.2846	3	3	2.348	14
					2dpf vs. 4dpf	1.102	1.569	-0.4666	0.2846	3	3	2.318	14
					2dpf vs. 5dpf	1.102	0.6155	0.4866	0.2846	3	3	2.418	14
					2dpf vs. 6dpf	1.102	1.026	0.07617	0.2846	3	3	0.3785	14
					2dpf vs. 7dpf	1.102	1.118	-0.01578	0.2846	3	3	0.07841	14
					3dpf vs. 4dpf	1.575	1.569	0.00592	0.2846	3	3	0.02941	14
					3dpf vs. 5dpf	1.575	0.6155	0.9591	0.2846	3	3	4.765	14
					3dpf vs. 6dpf	1.575	1.026	0.5486	0.2846	3	3	2.726	14
					3dpf vs. 7dpf	1.575	1.118	0.4567	0.2846	3	3	2.269	14
					4dpf vs. 5dpf	1.569	0.6155	0.9532	0.2846	3	3	4.736	14
					4dpf vs. 6dpf	1.569	1.026	0.5427	0.2846	3	3	2.697	14
					4dpf vs. 7dpf	1.569	1.118	0.4508	0.2846	3	3	2.24	14
					5dpf vs. 6dpf	0.6155	1.026	-0.4104	0.2846	3	3	2.039	14
					5dpf vs. 7dpf	0.6155	1.118	-0.5024	0.2846	3	3	2.496	14
					6dpf vs. 7dpf	1.026	1.118	-0.09195	0.2846	3	3	0.4569	14

## Sheet: eif2b3
	Expression Fold Change				Ordinary one-way ANOVA											Expression Fold Change								Descriptive Statistics
																1dpf	2dpf	3dpf	4dpf	5dpf	6dpf	7dpf			1dpf	2dpf	3dpf	4dpf	5dpf	6dpf	7dpf
																1.09955	0.197166	0.290558	0.170418	0.341204	0.473077	0.34129			Number of values	3	3	3	3	3	3	3
	eif2b3				Number of families	1										0.89181	1.23596	1.00686	2.05808	0.477663	0.717059	0.533055
1dpf	1.09955	0.89181	1.01979		Number of comparisons per family	21										1.01979	0.674651	0.70451	0.531017	0.560349	0.631271	0.553211			Minimum	0.8918	0.1972	0.2906	0.1704	0.3412	0.4731	0.3413
2dpf	0.197166	1.23596	0.674651		Alpha	0.05																			Maximum	1.1	1.236	1.007	2.058	0.5603	0.7171	0.5532
3dpf	0.290558	1.00686	0.70451																						Range	0.2077	1.039	0.7163	1.888	0.2191	0.244	0.2119
4dpf	0.170418	2.05808	0.531017		Tukey's multiple comparisons test	Mean Diff.	95.00% CI of diff.	Significant?	Summary
5dpf	0.341204	0.477663	0.560349		1dpf vs. 2dpf	0.3011	-0.9704 to 1.573	No	ns		A-B														Mean	1.004	0.7026	0.6673	0.9198	0.4597	0.6071	0.4759
6dpf	0.473077	0.717059	0.631271		1dpf vs. 3dpf	0.3364	-0.9352 to 1.608	No	ns		A-C														Std. Deviation	0.1048	0.52	0.3596	1.002	0.1107	0.1238	0.117
7dpf	0.34129	0.533055	0.553211		1dpf vs. 4dpf	0.08388	-1.188 to 1.355	No	ns		A-D														Std. Error of Mean	0.06051	0.3002	0.2076	0.5786	0.06389	0.07146	0.06753
					1dpf vs. 5dpf	0.544	-0.7276 to 1.816	No	ns		A-E
					1dpf vs. 6dpf	0.3966	-0.8750 to 1.668	No	ns		A-F														Lower 95% CI of mean	0.7434	-0.5891	-0.226	-1.57	0.1848	0.2997	0.1853
					1dpf vs. 7dpf	0.5279	-0.7437 to 1.799	No	ns		A-G														Upper 95% CI of mean	1.264	1.994	1.561	3.409	0.7347	0.9146	0.7664
					2dpf vs. 3dpf	0.03528	-1.236 to 1.307	No	ns		B-C
					2dpf vs. 4dpf	-0.2172	-1.489 to 1.054	No	ns		B-D
					2dpf vs. 5dpf	0.2429	-1.029 to 1.514	No	ns		B-E
					2dpf vs. 6dpf	0.09546	-1.176 to 1.367	No	ns		B-F
					2dpf vs. 7dpf	0.2267	-1.045 to 1.498	No	ns		B-G
					3dpf vs. 4dpf	-0.2525	-1.524 to 1.019	No	ns		C-D
					3dpf vs. 5dpf	0.2076	-1.064 to 1.479	No	ns		C-E
					3dpf vs. 6dpf	0.06017	-1.211 to 1.332	No	ns		C-F
					3dpf vs. 7dpf	0.1915	-1.080 to 1.463	No	ns		C-G
					4dpf vs. 5dpf	0.4601	-0.8115 to 1.732	No	ns		D-E
					4dpf vs. 6dpf	0.3127	-0.9589 to 1.584	No	ns		D-F
					4dpf vs. 7dpf	0.444	-0.8276 to 1.716	No	ns		D-G
					5dpf vs. 6dpf	-0.1474	-1.419 to 1.124	No	ns		E-F
					5dpf vs. 7dpf	-0.01611	-1.288 to 1.255	No	ns		E-G
					6dpf vs. 7dpf	0.1313	-1.140 to 1.403	No	ns		F-G
					Test details	Mean 1	Mean 2	Mean Diff.	SE of diff.	n1	n2	q	DF
					1dpf vs. 2dpf	1.004	0.7026	0.3011	0.3724	3	3	1.144	14
					1dpf vs. 3dpf	1.004	0.6673	0.3364	0.3724	3	3	1.278	14
					1dpf vs. 4dpf	1.004	0.9198	0.08388	0.3724	3	3	0.3185	14
					1dpf vs. 5dpf	1.004	0.4597	0.544	0.3724	3	3	2.066	14
					1dpf vs. 6dpf	1.004	0.6071	0.3966	0.3724	3	3	1.506	14
					1dpf vs. 7dpf	1.004	0.4759	0.5279	0.3724	3	3	2.005	14
					2dpf vs. 3dpf	0.7026	0.6673	0.03528	0.3724	3	3	0.134	14
					2dpf vs. 4dpf	0.7026	0.9198	-0.2172	0.3724	3	3	0.825	14
					2dpf vs. 5dpf	0.7026	0.4597	0.2429	0.3724	3	3	0.9223	14
					2dpf vs. 6dpf	0.7026	0.6071	0.09546	0.3724	3	3	0.3625	14
					2dpf vs. 7dpf	0.7026	0.4759	0.2267	0.3724	3	3	0.8611	14
					3dpf vs. 4dpf	0.6673	0.9198	-0.2525	0.3724	3	3	0.959	14
					3dpf vs. 5dpf	0.6673	0.4597	0.2076	0.3724	3	3	0.7883	14
					3dpf vs. 6dpf	0.6673	0.6071	0.06017	0.3724	3	3	0.2285	14
					3dpf vs. 7dpf	0.6673	0.4759	0.1915	0.3724	3	3	0.7271	14
					4dpf vs. 5dpf	0.9198	0.4597	0.4601	0.3724	3	3	1.747	14
					4dpf vs. 6dpf	0.9198	0.6071	0.3127	0.3724	3	3	1.188	14
					4dpf vs. 7dpf	0.9198	0.4759	0.444	0.3724	3	3	1.686	14
					5dpf vs. 6dpf	0.4597	0.6071	-0.1474	0.3724	3	3	0.5598	14
					5dpf vs. 7dpf	0.4597	0.4759	-0.01611	0.3724	3	3	0.06119	14
					6dpf vs. 7dpf	0.6071	0.4759	0.1313	0.3724	3	3	0.4986	14

## Sheet: eif2b4
	Expression Fold Change				Ordinary one-way ANOVA											Expression Fold Change								Descriptive Statistics
																1dpf	2dpf	3dpf	4dpf	5dpf	6dpf	7dpf			1dpf	2dpf	3dpf	4dpf	5dpf	6dpf	7dpf
																0.776606	0.538521	0.571976	0.650631	0.434183	0.740786	1.94302			Number of values	3	3	3	3	3	3	3
	eif2b4				Number of families	1										1.20874	1.39234	0.898761	2.14545	0.712679	0.862684	1.95236
1dpf	0.776606	1.20874	1.06529		Number of comparisons per family	21										1.06529	0.547881	0.810873	0.945593	0.67681	1.08543	2.05109			Minimum	0.7766	0.5385	0.572	0.6506	0.4342	0.7408	1.943
2dpf	0.538521	1.39234	0.547881		Alpha	0.05																			Maximum	1.209	1.392	0.8988	2.145	0.7127	1.085	2.051
3dpf	0.571976	0.898761	0.810873																						Range	0.4321	0.8538	0.3268	1.495	0.2785	0.3446	0.1081
4dpf	0.650631	2.14545	0.945593		Tukey's multiple comparisons test	Mean Diff.	95.00% CI of diff.	Significant?	Summary
5dpf	0.434183	0.712679	0.67681		1dpf vs. 2dpf	0.1906	-0.8638 to 1.245	No	ns		A-B														Mean	1.017	0.8262	0.7605	1.247	0.6079	0.8963	1.982
6dpf	0.740786	0.862684	1.08543		1dpf vs. 3dpf	0.2563	-0.7981 to 1.311	No	ns		A-C														Std. Deviation	0.2201	0.4903	0.1691	0.7917	0.1515	0.1748	0.05988
7dpf	1.94302	1.95236	2.05109		1dpf vs. 4dpf	-0.2303	-1.285 to 0.8241	No	ns		A-D														Std. Error of Mean	0.1271	0.2831	0.09763	0.4571	0.08747	0.1009	0.03457
					1dpf vs. 5dpf	0.409	-0.6455 to 1.463	No	ns		A-E
					1dpf vs. 6dpf	0.1206	-0.9339 to 1.175	No	ns		A-F														Lower 95% CI of mean	0.4701	-0.3917	0.3404	-0.7196	0.2315	0.4622	1.833
					1dpf vs. 7dpf	-0.9653	-2.020 to 0.08919	No	ns		A-G														Upper 95% CI of mean	1.564	2.044	1.181	3.214	0.9842	1.33	2.131
					2dpf vs. 3dpf	0.06571	-0.9888 to 1.120	No	ns		B-C
					2dpf vs. 4dpf	-0.421	-1.475 to 0.6335	No	ns		B-D
					2dpf vs. 5dpf	0.2184	-0.8361 to 1.273	No	ns		B-E
					2dpf vs. 6dpf	-0.07005	-1.125 to 0.9844	No	ns		B-F
					2dpf vs. 7dpf	-1.156	-2.210 to -0.1014	Yes	*		B-G
					3dpf vs. 4dpf	-0.4867	-1.541 to 0.5678	No	ns		C-D
					3dpf vs. 5dpf	0.1526	-0.9018 to 1.207	No	ns		C-E
					3dpf vs. 6dpf	-0.1358	-1.190 to 0.9187	No	ns		C-F
					3dpf vs. 7dpf	-1.222	-2.276 to -0.1671	Yes	*		C-G
					4dpf vs. 5dpf	0.6393	-0.4151 to 1.694	No	ns		D-E
					4dpf vs. 6dpf	0.3509	-0.7035 to 1.405	No	ns		D-F
					4dpf vs. 7dpf	-0.7349	-1.789 to 0.3195	No	ns		D-G
					5dpf vs. 6dpf	-0.2884	-1.343 to 0.7661	No	ns		E-F
					5dpf vs. 7dpf	-1.374	-2.429 to -0.3198	Yes	**		E-G
					6dpf vs. 7dpf	-1.086	-2.140 to -0.03139	Yes	*		F-G
					Test details	Mean 1	Mean 2	Mean Diff.	SE of diff.	n1	n2	q	DF
					1dpf vs. 2dpf	1.017	0.8262	0.1906	0.3088	3	3	0.873	14
					1dpf vs. 3dpf	1.017	0.7605	0.2563	0.3088	3	3	1.174	14
					1dpf vs. 4dpf	1.017	1.247	-0.2303	0.3088	3	3	1.055	14
					1dpf vs. 5dpf	1.017	0.6079	0.409	0.3088	3	3	1.873	14
					1dpf vs. 6dpf	1.017	0.8963	0.1206	0.3088	3	3	0.5522	14
					1dpf vs. 7dpf	1.017	1.982	-0.9653	0.3088	3	3	4.42	14
					2dpf vs. 3dpf	0.8262	0.7605	0.06571	0.3088	3	3	0.3009	14
					2dpf vs. 4dpf	0.8262	1.247	-0.421	0.3088	3	3	1.928	14
					2dpf vs. 5dpf	0.8262	0.6079	0.2184	0.3088	3	3	1	14
					2dpf vs. 6dpf	0.8262	0.8963	-0.07005	0.3088	3	3	0.3208	14
					2dpf vs. 7dpf	0.8262	1.982	-1.156	0.3088	3	3	5.293	14
					3dpf vs. 4dpf	0.7605	1.247	-0.4867	0.3088	3	3	2.229	14
					3dpf vs. 5dpf	0.7605	0.6079	0.1526	0.3088	3	3	0.699	14
					3dpf vs. 6dpf	0.7605	0.8963	-0.1358	0.3088	3	3	0.6217	14
					3dpf vs. 7dpf	0.7605	1.982	-1.222	0.3088	3	3	5.594	14
					4dpf vs. 5dpf	1.247	0.6079	0.6393	0.3088	3	3	2.928	14
					4dpf vs. 6dpf	1.247	0.8963	0.3509	0.3088	3	3	1.607	14
					4dpf vs. 7dpf	1.247	1.982	-0.7349	0.3088	3	3	3.366	14
					5dpf vs. 6dpf	0.6079	0.8963	-0.2884	0.3088	3	3	1.321	14
					5dpf vs. 7dpf	0.6079	1.982	-1.374	0.3088	3	3	6.293	14
					6dpf vs. 7dpf	0.8963	1.982	-1.086	0.3088	3	3	4.973	14

## Sheet: eif2b5
	Expression Fold Change				Ordinary one-way ANOVA											Expression Fold Change								Descriptive Statistics
																1dpf	2dpf	3dpf	4dpf	5dpf	6dpf	7dpf			1dpf	2dpf	3dpf	4dpf	5dpf	6dpf	7dpf
	eif2b5															0.649478	0.638075	0.803534	0.902856	0.601314	0.878612	1.90005			Number of values	3	3	3	3	3	3	3
1dpf	0.649478	1.20864	1.2739		Number of families	1										1.20864	1.70773	1.88911	2.84853	0.738348	1.16469	1.21745
2dpf	0.638075	1.70773	0.839509		Number of comparisons per family	21										1.2739	0.839509	1.48308	1.12144	0.864155	1.0485	2.46881			Minimum	0.6495	0.6381	0.8035	0.9029	0.6013	0.8786	1.217
3dpf	0.803534	1.88911	1.48308		Alpha	0.05																			Maximum	1.274	1.708	1.889	2.849	0.8642	1.165	2.469
4dpf	0.902856	2.84853	1.12144																						Range	0.6244	1.07	1.086	1.946	0.2628	0.2861	1.251
5dpf	0.601314	0.738348	0.864155		Tukey's multiple comparisons test	Mean Diff.	95.00% CI of diff.	Significant?	Summary
6dpf	0.878612	1.16469	1.0485		1dpf vs. 2dpf	-0.01776	-1.619 to 1.583	No	ns		A-B														Mean	1.044	1.062	1.392	1.624	0.7346	1.031	1.862
7dpf	1.90005	1.21745	2.46881		1dpf vs. 3dpf	-0.3479	-1.949 to 1.253	No	ns		A-C														Std. Deviation	0.3432	0.5684	0.5485	1.066	0.1315	0.1439	0.6265
					1dpf vs. 4dpf	-0.5803	-2.181 to 1.021	No	ns		A-D														Std. Error of Mean	0.1982	0.3282	0.3167	0.6154	0.0759	0.08307	0.3617
					1dpf vs. 5dpf	0.3094	-1.292 to 1.910	No	ns		A-E
					1dpf vs. 6dpf	0.01341	-1.588 to 1.614	No	ns		A-F														Lower 95% CI of mean	0.1914	-0.3502	0.02936	-1.023	0.408	0.6732	0.3057
					1dpf vs. 7dpf	-0.8181	-2.419 to 0.7829	No	ns		A-G														Upper 95% CI of mean	1.897	2.474	2.754	4.272	1.061	1.388	3.419
					2dpf vs. 3dpf	-0.3301	-1.931 to 1.271	No	ns		B-C
					2dpf vs. 4dpf	-0.5625	-2.164 to 1.038	No	ns		B-D
					2dpf vs. 5dpf	0.3272	-1.274 to 1.928	No	ns		B-E
					2dpf vs. 6dpf	0.03117	-1.570 to 1.632	No	ns		B-F
					2dpf vs. 7dpf	-0.8003	-2.401 to 0.8007	No	ns		B-G
					3dpf vs. 4dpf	-0.2324	-1.833 to 1.369	No	ns		C-D
					3dpf vs. 5dpf	0.6573	-0.9437 to 2.258	No	ns		C-E
					3dpf vs. 6dpf	0.3613	-1.240 to 1.962	No	ns		C-F
					3dpf vs. 7dpf	-0.4702	-2.071 to 1.131	No	ns		C-G
					4dpf vs. 5dpf	0.8897	-0.7113 to 2.491	No	ns		D-E
					4dpf vs. 6dpf	0.5937	-1.007 to 2.195	No	ns		D-F
					4dpf vs. 7dpf	-0.2378	-1.839 to 1.363	No	ns		D-G
					5dpf vs. 6dpf	-0.296	-1.897 to 1.305	No	ns		E-F
					5dpf vs. 7dpf	-1.127	-2.729 to 0.4735	No	ns		E-G
					6dpf vs. 7dpf	-0.8315	-2.433 to 0.7695	No	ns		F-G
					Test details	Mean 1	Mean 2	Mean Diff.	SE of diff.	n1	n2	q	DF
					1dpf vs. 2dpf	1.044	1.062	-0.01776	0.4689	3	3	0.05358	14
					1dpf vs. 3dpf	1.044	1.392	-0.3479	0.4689	3	3	1.049	14
					1dpf vs. 4dpf	1.044	1.624	-0.5803	0.4689	3	3	1.75	14
					1dpf vs. 5dpf	1.044	0.7346	0.3094	0.4689	3	3	0.9332	14
					1dpf vs. 6dpf	1.044	1.031	0.01341	0.4689	3	3	0.04045	14
					1dpf vs. 7dpf	1.044	1.862	-0.8181	0.4689	3	3	2.468	14
					2dpf vs. 3dpf	1.062	1.392	-0.3301	0.4689	3	3	0.9958	14
					2dpf vs. 4dpf	1.062	1.624	-0.5625	0.4689	3	3	1.697	14
					2dpf vs. 5dpf	1.062	0.7346	0.3272	0.4689	3	3	0.9868	14
					2dpf vs. 6dpf	1.062	1.031	0.03117	0.4689	3	3	0.09402	14
					2dpf vs. 7dpf	1.062	1.862	-0.8003	0.4689	3	3	2.414	14
					3dpf vs. 4dpf	1.392	1.624	-0.2324	0.4689	3	3	0.7009	14
					3dpf vs. 5dpf	1.392	0.7346	0.6573	0.4689	3	3	1.983	14
					3dpf vs. 6dpf	1.392	1.031	0.3613	0.4689	3	3	1.09	14
					3dpf vs. 7dpf	1.392	1.862	-0.4702	0.4689	3	3	1.418	14
					4dpf vs. 5dpf	1.624	0.7346	0.8897	0.4689	3	3	2.683	14
					4dpf vs. 6dpf	1.624	1.031	0.5937	0.4689	3	3	1.791	14
					4dpf vs. 7dpf	1.624	1.862	-0.2378	0.4689	3	3	0.7173	14
					5dpf vs. 6dpf	0.7346	1.031	-0.296	0.4689	3	3	0.8928	14
					5dpf vs. 7dpf	0.7346	1.862	-1.127	0.4689	3	3	3.401	14
					6dpf vs. 7dpf	1.031	1.862	-0.8315	0.4689	3	3	2.508	14
