# Supplementary material for: Vanishing white matter disease expression of truncated EIF2B5 activates induced stress response
Source: eLife. 2020 Dec 10;9:e56319. doi: 10.7554/eLife.56319 (PMC7752137; doi:10.7554/eLife.56319)
Supplement: Figure 2—source data 1. [file elife-56319-fig2-data1.xlsx]

## Sheet: Sheet1
age matched control	eif2b5zcA9/zcA9		Parameter					age matched control	eif2b5zcA9/zcA9
2.471	1.997		Table Analyzed	Data 1			Number of values	54	76
2.336	1.283
2.159	1.676		Column A	age matched control			Minimum	1.711	0.916
2.341	1.436		vs.	vs.			Maximum	2.641	2.407
2.193	2.296		Column B	eif2b5zcA9/zcA9			Range	0.93	1.491
2.458	1.665
2.371	2.044		Unpaired t test				Mean	2.216	1.806
1.868	1.625		P value	<0.0001			Std. Deviation	0.2304	0.2661
2.385	1.991		P value summary	****			Std. Error of Mean	0.03135	0.03052
2.356	1.762		Significantly different (P < 0.05)?	Yes
2.368	1.603		One- or two-tailed P value?	Two-tailed			Lower 95% CI of mean	2.153	1.745
2.267	1.885		t, df	t=9.135, df=128			Upper 95% CI of mean	2.278	1.867
2.303	1.582
2.487	2.036		How big is the difference?
2.526	1.895		Mean of column A	2.216
2.444	2.267		Mean of column B	1.806
2.418	1.702		Difference between means (A - B) ± SEM	0.4095 ± 0.04483
2.32	1.744		95% confidence interval	0.3208 to 0.4982
2.363	2.195		R squared (eta squared)	0.3946
2.369	2.124
2.324	1.919		F test to compare variances
2.215	1.929		F, DFn, Dfd	1.334, 75, 53
2.485	1.969		P value	0.2689
2.004	1.783		P value summary	ns
1.767	1.526		Significantly different (P < 0.05)?	No
2.126	1.85
2.074	1.886		Data analyzed
2.129	2.054		Sample size, column A	54
2.053	1.575		Sample size, column B	76
2.156	1.833
2.119	1.928
2.201	1.539
2.067	2.01
2.116	1.946
1.711	1.781
1.849	1.88
1.908	2.041
1.981	1.798
1.835	1.581
1.986	1.532
1.923	2.161
2.33	1.642
2.012	1.934
2.033	1.349
1.984	1.518
2.539	1.964
2.109	1.617
2.545	1.561
2.641	1.712
1.885	1.594
2.413	1.382
2.401	1.768
2.471	1.394
2.448	1.307
	1.827
	1.839
	1.966
	1.83
	1.954
	2.029
	1.806
	1.507
	0.916
	1.69
	1.882
	2.157
	1.743
	1.963
	1.942
	1.993
	1.947
	1.87
	2.309
	1.533
	2.082
	2.407
