# Supplementary material for: Vanishing white matter disease expression of truncated EIF2B5 activates induced stress response
Source: eLife. 2020 Dec 10;9:e56319. doi: 10.7554/eLife.56319 (PMC7752137; doi:10.7554/eLife.56319)
Supplement: Figure 2—source data 2. [file elife-56319-fig2-data2.xlsx]

## Sheet: Distance moved
control WT	control MUT			control WT	control MUT
778.187	593.536		Number of values	48	38		Table Analyzed	Distance Moved
1117.28	119.994
918.459	307.561		Minimum	295.9	0.4051		Column B	control MUT
1096.14	0.405109		Maximum	1117	826.5		vs.	vs.
819.243	138.555		Range	821.4	826.1		Column A	control WT
894.167	66.9838
1058.68	3.21898		Mean	716.4	246.7		Unpaired t test
685.161	826.457		Std. Deviation	190.6	215		P value	<0.0001
874.374	174.21		Std. Error of Mean	27.51	34.88		P value summary	****
1013.1	504.522						Significantly different (P < 0.05)?	Yes
930.562	45.7804		Lower 95% CI of mean	661	176		One- or two-tailed P value?	Two-tailed
490.441	70.2379		Upper 95% CI of mean	771.7	317.4		t, df	t=10.72, df=84
886.822	51.3953
784.954	152.033						How big is the difference?
737.031	0.408967						Mean of column A	716.4
563.805	40.7682						Mean of column B	246.7
497.336	91.4744						Difference between means (B - A) ± SEM	-469.7 ± 43.80
749.411	445.38						95% confidence interval	-556.8 to -382.6
631.972	213.659						R squared (eta squared)	0.5778
502.316	368.726
439.254	247.257						F test to compare variances
713.428	161.276						F, DFn, Dfd	1.272, 37, 47
713.694	34.0318						P value	0.432
336.67	242.812						P value summary	ns
784.706	160.43						Significantly different (P < 0.05)?	No
929.219	136.751
769.038	372.944						Data analyzed
660.763	321.129						Sample size, column A	48
791.764	796.227						Sample size, column B	38
590.869	242.347
765.452	252.504
590.321	262.361
295.881	465.026
400.838	259.603
562.858	701.945
533.59	303.155
699.279	84.2255
488.298	115.969
637.11
750.389
856.732
675.938
757.319
766.801
660.879
968.719
647.774
569.216

## Sheet: Velocity
control WT	control MUT			control WT	control MUT		Table Analyzed	Velocity
2.59534	1.97951		Number of values	48	38
3.72626	0.400194						Column B	control MUT
3.06316	1.02575		Minimum	0.9868	0.001351		vs.	vs.
3.65575	0.00135108		Maximum	3.726	2.756		Column A	control WT
2.73227	0.462098		Range	2.739	2.755
2.98215	0.223398						Unpaired t test
3.5308	0.0107357		Mean	2.389	0.8231		P value	<0.0001
2.28509	2.75633		Std. Deviation	0.6356	0.7174		P value summary	****
2.91613	0.581011		Std. Error of Mean	0.09175	0.1164		Significantly different (P < 0.05)?	Yes
3.37882	1.68264						One- or two-tailed P value?	Two-tailed
3.10353	0.152744		Lower 95% CI of mean	2.205	0.5873		t, df	t=10.72, df=84
1.63568	0.234345		Upper 95% CI of mean	2.574	1.059
2.95765	0.171478						How big is the difference?
2.61791	0.507251						Mean of column A	2.389
2.45907	0.0013645						Mean of column B	0.8231
1.8811	0.136021						Difference between means (B - A) ± SEM	-1.566 ± 0.1461
1.65934	0.3052						95% confidence interval	-1.857 to -1.276
2.50037	1.49537						R squared (eta squared)	0.5777
2.10854	0.712577
1.67595	1.22974						F test to compare variances
1.46555	0.82463						F, DFn, Dfd	1.274, 37, 47
2.38031	0.537873						P value	0.4302
2.3812	0.1135						P value summary	ns
1.12328	0.809806						Significantly different (P < 0.05)?	No
2.61708	0.535051
3.09905	0.456079						Data analyzed
2.56483	1.24381						Sample size, column A	48
2.20372	1.071						Sample size, column B	38
2.64062	2.65551
1.97061	0.808256
2.55287	0.84213
1.96879	0.875003
0.986796	1.55091
1.33684	0.865804
1.87719	2.34107
1.77958	1.01106
2.33217	0.280902
1.62853	0.386768
2.12483
2.50263
2.8573
2.25433
2.52574
2.55737
2.20411
3.23079
2.1604
1.8984
