# Supplementary material for: Vanishing white matter disease expression of truncated EIF2B5 activates induced stress response
Source: eLife. 2020 Dec 10;9:e56319. doi: 10.7554/eLife.56319 (PMC7752137; doi:10.7554/eLife.56319)
Supplement: Figure 2—source data 3. [file elife-56319-fig2-data3.xlsx]

## Sheet: Analysis
		Independent Variable	Distance moved	Velocity	Movement	Movement		Distance moved	Velocity	Movement	Movement	Distance moved	Velocity	Movement	Movement
		Independent Variable	center-point	center-point	Moving / center-point	Not Moving / center-point		center-point	center-point	Moving / center-point	Not Moving / center-point	center-point	center-point	Moving / center-point	Not Moving / center-point
		Genotype	Total	Mean	Cumulative Duration	Cumulative Duration		Total	Mean	Cumulative Duration	Cumulative Duration
			mm	mm/s	s	s		mm	mm/s	s	s	STDEV	STDEV	STDEV	STDEV
Trial 1	A12	het	466.382	1.61669	110.16	189.84	wt	436.129	1.55472	101.849	196.249	245.85	0.874616	52.8456	52.7546
Trial 1	B1	het	518.157	1.79616	143.48	156.52	eif2b4 het	471.447	1.70297	117.084	180.511	172.42	0.650872	43.2654	43.6598
Trial 1	B3	het	728.731	2.5261	150.72	149.28	eif2b4 mut	194.054	0.673791	50.2686	248.88	163.888	0.566865	54.955	54.1588
Trial 1	B6	het	478.87	1.65998	124.84	175.16
Trial 1	B9	het	400.341	1.38776	103.64	196.36
Trial 1	B11	het	482.131	1.67128	107.76	192.24
Trial 1	B12	het	585.707	2.03032	134.52	165.48
Trial 1	C2	het	412.399	1.42956	104.56	195.44
Trial 1	C7	het	389.34	1.34963	99.8	200.2
Trial 1	C8	het	535.54	1.85642	145.2	154.8
Trial 1	C11	het	364.013	1.26183	91.64	208.36
Trial 1	C12	het	391.325	1.35651	101.04	198.96
Trial 1	D1	het	401.816	1.39287	97.32	202.68
Trial 1	D3	het	398.386	1.38098	97.76	202.24
Trial 1	D6	het	262.787	0.910938	61.88	238.12
Trial 1	E1	het	540.831	1.87476	151.44	148.56
Trial 1	E2	het	360.764	1.25057	90.24	209.76
Trial 1	E3	het	733.965	2.54425	160.88	139.12
Trial 1	E6	het	438.771	1.52097	82.64	217.36
Trial 1	E7	het	382.61	1.3263	97.44	202.56
Trial 1	E12	het	498.647	1.72853	127.24	172.76
Trial 1	F1	het	437.265	1.51575	112.72	187.28
Trial 1	F7	het	248.648	0.861924	55.4	244.6
Trial 1	F8	het	521.131	1.80647	129.48	170.52
Trial 1	G1	het	512.915	1.77799	140.84	159.16
Trial 1	G3	het	530.443	1.83875	136.56	163.44
Trial 1	G8	het	368.608	1.27776	89.8	210.2
Trial 1	G10	het	241.445	0.836955	65.76	234.24
Trial 1	G12	het	379.19	1.31444	96.72	203.28
Trial 1	H3	het	408.726	1.41683	107.16	192.84
Trial 1	H7	het	782.03	2.71087	195.96	104.04
Trial 1	H8	het	543.053	1.88246	151.4	148.6
Trial 1	H9	het	544.213	1.88648	139.12	160.88
Trial 1	H10	het	213.6	0.740432	55.56	244.44
Trial 2	A1	het	607.183	2.31396	129.36	164.68
Trial 2	A2	het	534.965	2.03874	74.04	220
Trial 2	A7	het	355.01	1.35293	95.8	198.24
Trial 2	A8	het	592.385	2.25757	151.16	142.88
Trial 2	A9	het	291.846	1.11222	79.28	214.76
Trial 2	B1	het	1022.74	3.89765	258	36.04
Trial 2	B6	het	402.637	1.53444	104.76	189.28		t test
Trial 2	B9	het	999.141	3.8077	240.68	53.36		distance moved	velocity	movement time
Trial 2	B11	het	146.11	0.55682	25	269.04	het vs wt	0.408599	0.338423	0.116253
Trial 2	C2	het	254.964	0.971661	64.4	229.64	hom vs wt	0.000158756	9.17102e-05	0.00536631
Trial 2	C3	het	395.824	1.50848	101.68	192.36
Trial 2	C4	het	531.354	2.02498	131.4	162.64
Trial 2	C5	het	541.705	2.06443	142.64	151.4
Trial 2	C6	het	568.168	2.16528	128	166.04
Trial 2	C8	het	319.417	1.21729	84.08	209.96
Trial 2	C9	het	315.132	1.20096	78.52	215.52
Trial 2	C11	het	313.646	1.1953	83.6	210.44
Trial 2	D1	het	271.496	1.03466	66.92	227.12
Trial 2	D7	het	416.489	1.58723	111.16	182.88
Trial 2	D8	het	675.888	2.57579	158.72	135.32
Trial 2	E1	het	720.708	2.7466	191.4	102.64
Trial 2	E2	het	622.893	2.37383	178.64	115.4
Trial 2	E7	het	470.009	1.79119	133.88	160.16
Trial 1	A3	mut	475.47	1.64819	161.28	138.72
Trial 1	B8	mut	317.529	1.1007	86.2	213.8
Trial 1	B10	mut	290.83	1.00815	73.6	226.4
Trial 1	C10	mut	9.79219	0.0339441	0	300
Trial 1	D2	mut	173.797	0.602459	34.52	265.48
Trial 1	F2	mut	196.177	0.680036	42.04	257.96
Trial 1	F12	mut	13.8033	0.0478485	2.48	297.52
Trial 1	G4	mut	194.984	0.675903	45.52	254.48
Trial 1	G5	mut	493.656	1.71123	159.72	140.28
Trial 1	G6	mut	42.5875	0.147627	1.24	298.76
Trial 1	G11	mut	277.377	0.961511	65.2	234.8
Trial 1	H5	mut	185.471	0.642925	31.28	268.72
Trial 2	C12	mut	19.3838	0.073871	0.56	293.48
Trial 2	D11	mut	25.8934	0.0986791	0.12	293.92
Trial 1	A5	wt	450.317	1.561	111.92	188.08
Trial 1	A6	wt	370.014	1.28263	92.36	207.64
Trial 1	A7	wt	155.943	0.540567	34.8	265.2
Trial 1	A8	wt	518.898	1.79873	132.96	167.04
Trial 1	A10	wt	525.067	1.82011	128.44	171.56
Trial 1	B5	wt	420.26	1.45681	112.56	187.44
Trial 1	C4	wt	417.356	1.44674	110.76	189.24
Trial 1	C5	wt	289.078	1.00207	70.76	229.24
Trial 1	C6	wt	248.591	0.861727	61.44	238.56
Trial 1	C9	wt	244.091	0.846126	57.12	242.88
Trial 1	D4	wt	1239.9	4.29806	269.92	30.08
Trial 1	D5	wt	392.768	1.36151	97.76	202.24
Trial 1	D7	wt	422.63	1.46502	99.88	200.12
Trial 1	D8	wt	204.756	0.709774	47.72	252.28
Trial 1	D10	wt	272.8	0.945646	49.68	250.32
Trial 1	D11	wt	365.043	1.2654	85.64	214.36
Trial 1	D12	wt	236.699	0.820504	47.4	252.6
Trial 1	E4	wt	800.019	2.77322	151.2	148.8
Trial 1	E5	wt	275.043	0.953421	64.32	235.68
Trial 1	E9	wt	197.001	0.682892	44.04	255.96
Trial 1	E10	wt	957.456	3.31897	192.96	107.04
Trial 1	E11	wt	880.591	3.05252	169.48	130.52
Trial 1	F3	wt	590.143	2.0457	122.72	177.28
Trial 1	F4	wt	403.96	1.40031	104.96	195.04
Trial 1	F5	wt	594.168	2.05965	146.96	153.04
Trial 1	F10	wt	207.876	0.720592	41.04	258.96
Trial 1	F11	wt	480.291	1.6649	124.16	175.84
Trial 1	H1	wt	357.804	1.24031	73.32	226.68
Trial 1	H4	wt	344.176	1.19307	72.96	227.04
Trial 1	H6	wt	528.219	1.83155	124.6	175.4
Trial 1	H11	wt	591.785	2.05139	126	174
Trial 1	H12	wt	668.413	2.31862	156.8	143.2
Trial 2	A6	wt	58.9573	0.224685	4.52	289.52
Trial 2	A11	wt	254.654	0.97048	62.56	231.48
Trial 2	B3	wt	372.798	1.42073	98.36	195.68
Trial 2	B5	wt	85.2459	0.32487	14.88	279.16
Trial 2	B8	wt	337.836	1.28748	93.48	200.56
Trial 2	C7	wt	257.788	0.982423	61.4	232.64
Trial 2	C10	wt	266.288	1.01482	67.84	226.2
Trial 2	D4	wt	436.73	1.66437	113.76	180.28
Trial 2	D5	wt	519.503	1.97981	147.72	146.32
Trial 2	D6	wt	355.078	1.35319	87.76	206.28
Trial 2	D9	wt	1128.99	4.30253	237.28	56.76
Trial 2	D10	wt	639.68	2.4378	172.36	121.68
Trial 2	E8	wt	405.955	1.54709	103.76	190.28
Trial 2	E10	wt	418.983	1.59673	111.32	182.72
Trial 2	E11	wt	308.401	1.17531	83.24	210.8
