# Supplementary material for: Vanishing white matter disease expression of truncated EIF2B5 activates induced stress response
Source: eLife. 2020 Dec 10;9:e56319. doi: 10.7554/eLife.56319 (PMC7752137; doi:10.7554/eLife.56319)
Supplement: Figure 2—source data 4. [file elife-56319-fig2-data4.xlsx]

## Sheet: atf4
	Cт
	target gene	internal control			ΔCт			ΔCт mean	ΔΔCт			ΔΔCт mean	RQ			RQ mean	SE	Realtime機器算的RQ mean
control	20.1422	13.5665		Sample 1	6.5757	7.13957	7.23504	6.9406	-0.364899	0.198977	0.29444	5.92119e-16	1.28779	0.871168	0.815389	1.0218	0.232865	1
control	20.1163	13.0026			6.54983	7.1137	7.20917		-0.390771	0.173105	0.268568		1.31109	0.886932	0.830143
control	20.0395	12.9072			6.47305	7.03693	7.13239		-0.467546	0.0963303	0.191793		1.38276	0.935409	0.875517
eif2b4sa17367/sa17367	18.016	13.1306		Sample 2	4.88539	5.03548	5.41719	5.24686	-2.05521	-1.90512	-1.52341	-1.69374	4.15603	3.74539	2.87469	3.28319	0.586799	3.23494
eif2b4sa17367/sa17367	18.1404	12.9805			5.00979	5.15988	5.54159		-1.9308	-1.78071	-1.399		3.81268	3.43596	2.63719
eif2b4sa17367/sa17367	18.2941	12.5988			5.1635	5.31359	5.6953		-1.7771	-1.62701	-1.2453		3.42736	3.08872	2.37067
Sample 3				Sample 3	0	0	0	0	-6.9406	-6.9406	-6.9406	-6.9406	122.837	122.837	122.837	122.837	0	122.837
Sample 3					0	0	0		-6.9406	-6.9406	-6.9406		122.837	122.837	122.837
Sample 3					0	0	0		-6.9406	-6.9406	-6.9406		122.837	122.837	122.837
Sample 4				Sample 4	0	0	0	0	-6.9406	-6.9406	-6.9406	-6.9406	122.837	122.837	122.837	122.837	0	122.837
Sample 4					0	0	0		-6.9406	-6.9406	-6.9406		122.837	122.837	122.837
Sample 4					0	0	0		-6.9406	-6.9406	-6.9406		122.837	122.837	122.837
Sample 5				Sample 5	0	0	0	0	-6.9406	-6.9406	-6.9406	-6.9406	122.837	122.837	122.837	122.837	0	122.837
Sample 5					0	0	0		-6.9406	-6.9406	-6.9406		122.837	122.837	122.837
Sample 5					0	0	0		-6.9406	-6.9406	-6.9406		122.837	122.837	122.837
Sample 6				Sample 6	0	0	0	0	-6.9406	-6.9406	-6.9406	-6.9406	122.837	122.837	122.837	122.837	0	122.837
Sample 6					0	0	0		-6.9406	-6.9406	-6.9406		122.837	122.837	122.837
Sample 6					0	0	0		-6.9406	-6.9406	-6.9406		122.837	122.837	122.837
Sample 7				Sample 7	0	0	0	0	-6.9406	-6.9406	-6.9406	-6.9406	122.837	122.837	122.837	122.837	0	122.837
Sample 7					0	0	0		-6.9406	-6.9406	-6.9406		122.837	122.837	122.837
Sample 7					0	0	0		-6.9406	-6.9406	-6.9406		122.837	122.837	122.837
Sample 8				Sample 8	0	0	0	0	-6.9406	-6.9406	-6.9406	-6.9406	122.837	122.837	122.837	122.837	0	122.837
Sample 8					0	0	0		-6.9406	-6.9406	-6.9406		122.837	122.837	122.837
Sample 8					0	0	0		-6.9406	-6.9406	-6.9406		122.837	122.837	122.837
Sample 9				Sample 9	0	0	0	0	-6.9406	-6.9406	-6.9406	-6.9406	122.837	122.837	122.837	122.837	0	122.837
Sample 9					0	0	0		-6.9406	-6.9406	-6.9406		122.837	122.837	122.837
Sample 9					0	0	0		-6.9406	-6.9406	-6.9406		122.837	122.837	122.837
	Value	SD	t-test
control	1	0.232865
eif2b4sa17367/sa17367	3.23494	0.586799	2.7879e-07
Sample 3	122.837	0	1.52212e-23
Sample 4	122.837	0	1.52212e-23
Sample 5	122.837	0	1.52212e-23
Sample 6	122.837	0	1.52212e-23
Sample 7	122.837	0	1.52212e-23
Sample 8	122.837	0	1.52212e-23
Sample 9	122.837	0	1.52212e-23

## Sheet: bip
	Cт
	target gene	internal control			ΔCт			ΔCт mean	ΔΔCт			ΔΔCт mean	RQ			RQ mean	SE	Realtime機器算的RQ mean
control	22.6526	13.5665		Sample 1	9.08613	9.65001	9.74547	9.21879	-0.132653	0.431223	0.526686	-1.18424e-15	1.09631	0.741633	0.694147	1.03132	0.278042	1
control	22.1661	13.0026			8.59957	9.16345	9.25891		-0.619216	-0.0553397	0.0401233		1.53604	1.0391	0.972572
control	22.3139	12.9072			8.74744	9.31131	9.40678		-0.471347	0.0925293	0.187992		1.3864	0.937877	0.877826
eif2b4sa17367/sa17367	21.7399	13.1306		Sample 2	8.60928	8.75937	9.14108	8.95121	-0.609503	-0.459414	-0.0777017	-0.267577	1.52573	1.37498	1.05534	1.22041	0.209688	1.20378
eif2b4sa17367/sa17367	21.86	12.9805			8.72944	8.87952	9.26124		-0.48935	-0.339261	0.0424513		1.40381	1.26511	0.971004
eif2b4sa17367/sa17367	21.9636	12.5988			8.83302	8.98311	9.36482		-0.38577	-0.235681	0.146031		1.30656	1.17746	0.903733
Sample 3				Sample 3	0	0	0	0	-9.21879	-9.21879	-9.21879	-9.21879	595.842	595.842	595.842	595.842	0	595.842
Sample 3					0	0	0		-9.21879	-9.21879	-9.21879		595.842	595.842	595.842
Sample 3					0	0	0		-9.21879	-9.21879	-9.21879		595.842	595.842	595.842
Sample 4				Sample 4	0	0	0	0	-9.21879	-9.21879	-9.21879	-9.21879	595.842	595.842	595.842	595.842	0	595.842
Sample 4					0	0	0		-9.21879	-9.21879	-9.21879		595.842	595.842	595.842
Sample 4					0	0	0		-9.21879	-9.21879	-9.21879		595.842	595.842	595.842
Sample 5				Sample 5	0	0	0	0	-9.21879	-9.21879	-9.21879	-9.21879	595.842	595.842	595.842	595.842	0	595.842
Sample 5					0	0	0		-9.21879	-9.21879	-9.21879		595.842	595.842	595.842
Sample 5					0	0	0		-9.21879	-9.21879	-9.21879		595.842	595.842	595.842
Sample 6				Sample 6	0	0	0	0	-9.21879	-9.21879	-9.21879	-9.21879	595.842	595.842	595.842	595.842	0	595.842
Sample 6					0	0	0		-9.21879	-9.21879	-9.21879		595.842	595.842	595.842
Sample 6					0	0	0		-9.21879	-9.21879	-9.21879		595.842	595.842	595.842
Sample 7				Sample 7	0	0	0	0	-9.21879	-9.21879	-9.21879	-9.21879	595.842	595.842	595.842	595.842	0	595.842
Sample 7					0	0	0		-9.21879	-9.21879	-9.21879		595.842	595.842	595.842
Sample 7					0	0	0		-9.21879	-9.21879	-9.21879		595.842	595.842	595.842
Sample 8				Sample 8	0	0	0	0	-9.21879	-9.21879	-9.21879	-9.21879	595.842	595.842	595.842	595.842	0	595.842
Sample 8					0	0	0		-9.21879	-9.21879	-9.21879		595.842	595.842	595.842
Sample 8					0	0	0		-9.21879	-9.21879	-9.21879		595.842	595.842	595.842
Sample 9				Sample 9	0	0	0	0	-9.21879	-9.21879	-9.21879	-9.21879	595.842	595.842	595.842	595.842	0	595.842
Sample 9					0	0	0		-9.21879	-9.21879	-9.21879		595.842	595.842	595.842
Sample 9					0	0	0		-9.21879	-9.21879	-9.21879		595.842	595.842	595.842
	Value	SD	t-test
control	1	0.278042
eif2b4sa17367/sa17367	1.20378	0.209688	0.0621572
Sample 3	595.842	0	1.94566e-28
Sample 4	595.842	0	1.94566e-28
Sample 5	595.842	0	1.94566e-28
Sample 6	595.842	0	1.94566e-28
Sample 7	595.842	0	1.94566e-28
Sample 8	595.842	0	1.94566e-28
Sample 9	595.842	0	1.94566e-28

## Sheet: chopII
	Cт
	target gene	internal control			ΔCт			ΔCт mean	ΔΔCт			ΔΔCт mean	RQ			RQ mean	SE	Realtime機器算的RQ mean
control	22.1544	13.5665		Sample 1	8.58788	9.15176	9.24722	8.81594	-0.228058	0.335818	0.431281	-5.92119e-16	1.17126	0.792335	0.741603	1.02644	0.256599	1
control	21.801	13.0026			8.23456	8.79843	8.89389		-0.581385	-0.0175093	0.0779537		1.49629	1.01221	0.9474
control	21.9687	12.9072			8.40217	8.96604	9.06151		-0.413771	0.150105	0.245568		1.33216	0.901185	0.843484
eif2b4sa17367/sa17367	20.3176	13.1306		Sample 2	7.18698	7.33707	7.71878	7.49422	-1.62896	-1.47887	-1.09716	-1.32172	3.0929	2.78731	2.13933	2.5318	0.418685	2.49964
eif2b4sa17367/sa17367	20.3936	12.9805			7.26299	7.41308	7.79479		-1.55295	-1.40286	-1.02115		2.93416	2.64425	2.02953
eif2b4sa17367/sa17367	20.4814	12.5988			7.3508	7.50089	7.8826		-1.46514	-1.31505	-0.93334		2.76091	2.48811	1.90969
Sample 3				Sample 3	0	0	0	0	-8.81594	-8.81594	-8.81594	-8.81594	450.674	450.674	450.674	450.674	6.02916e-14	450.674
Sample 3					0	0	0		-8.81594	-8.81594	-8.81594		450.674	450.674	450.674
Sample 3					0	0	0		-8.81594	-8.81594	-8.81594		450.674	450.674	450.674
Sample 4				Sample 4	0	0	0	0	-8.81594	-8.81594	-8.81594	-8.81594	450.674	450.674	450.674	450.674	6.02916e-14	450.674
Sample 4					0	0	0		-8.81594	-8.81594	-8.81594		450.674	450.674	450.674
Sample 4					0	0	0		-8.81594	-8.81594	-8.81594		450.674	450.674	450.674
Sample 5				Sample 5	0	0	0	0	-8.81594	-8.81594	-8.81594	-8.81594	450.674	450.674	450.674	450.674	6.02916e-14	450.674
Sample 5					0	0	0		-8.81594	-8.81594	-8.81594		450.674	450.674	450.674
Sample 5					0	0	0		-8.81594	-8.81594	-8.81594		450.674	450.674	450.674
Sample 6				Sample 6	0	0	0	0	-8.81594	-8.81594	-8.81594	-8.81594	450.674	450.674	450.674	450.674	6.02916e-14	450.674
Sample 6					0	0	0		-8.81594	-8.81594	-8.81594		450.674	450.674	450.674
Sample 6					0	0	0		-8.81594	-8.81594	-8.81594		450.674	450.674	450.674
Sample 7				Sample 7	0	0	0	0	-8.81594	-8.81594	-8.81594	-8.81594	450.674	450.674	450.674	450.674	6.02916e-14	450.674
Sample 7					0	0	0		-8.81594	-8.81594	-8.81594		450.674	450.674	450.674
Sample 7					0	0	0		-8.81594	-8.81594	-8.81594		450.674	450.674	450.674
Sample 8				Sample 8	0	0	0	0	-8.81594	-8.81594	-8.81594	-8.81594	450.674	450.674	450.674	450.674	6.02916e-14	450.674
Sample 8					0	0	0		-8.81594	-8.81594	-8.81594		450.674	450.674	450.674
Sample 8					0	0	0		-8.81594	-8.81594	-8.81594		450.674	450.674	450.674
Sample 9				Sample 9	0	0	0	0	-8.81594	-8.81594	-8.81594	-8.81594	450.674	450.674	450.674	450.674	6.02916e-14	450.674
Sample 9					0	0	0		-8.81594	-8.81594	-8.81594		450.674	450.674	450.674
Sample 9					0	0	0		-8.81594	-8.81594	-8.81594		450.674	450.674	450.674
	Value	SD	t-test
control	1	0.256599
eif2b4sa17367/sa17367	2.49964	0.418685	2.00627e-07
Sample 3	450.674	6.02916e-14	9.60004e-28
Sample 4	450.674	6.02916e-14	9.60004e-28
Sample 5	450.674	6.02916e-14	9.60004e-28
Sample 6	450.674	6.02916e-14	9.60004e-28
Sample 7	450.674	6.02916e-14	9.60004e-28
Sample 8	450.674	6.02916e-14	9.60004e-28
Sample 9	450.674	6.02916e-14	9.60004e-28

## Sheet: perk
	Cт
	target gene	internal control			ΔCт			ΔCт mean	ΔΔCт			ΔΔCт mean	RQ			RQ mean	SE	Realtime機器算的RQ mean
control	25.3362	13.5665		Sample 1	11.7697	12.3336	12.4291	12.4077	-0.637975	-0.0740993	0.0213637	-5.92119e-16	1.55614	1.0527	0.985301	1.03216	0.282062	1
control	25.8471	13.0026			12.2806	12.8444	12.9399		-0.12716	0.436716	0.532179		1.09214	0.738815	0.69151
control	25.5161	12.9072			11.9496	12.5135	12.609		-0.458079	0.105797	0.20126		1.37371	0.929292	0.869791
eif2b4sa17367/sa17367	25.9186	13.1306		Sample 2	12.788	12.9381	13.3198	13.0268	0.380282	0.530371	0.912083	0.619094	0.768288	0.692377	0.531417	0.658764	0.104033	0.65108
eif2b4sa17367/sa17367	25.9288	12.9805			12.7982	12.9483	13.33		0.390514	0.540603	0.922315		0.762858	0.687484	0.527662
eif2b4sa17367/sa17367	25.9429	12.5988			12.8123	12.9624	13.3441		0.404598	0.554687	0.936399		0.755447	0.680805	0.522536
Sample 3				Sample 3	0	0	0	0	-12.4077	-12.4077	-12.4077	-12.4077	5433.72	5433.72	5433.72	5433.72	9.64665e-13	5433.72
Sample 3					0	0	0		-12.4077	-12.4077	-12.4077		5433.72	5433.72	5433.72
Sample 3					0	0	0		-12.4077	-12.4077	-12.4077		5433.72	5433.72	5433.72
Sample 4				Sample 4	0	0	0	0	-12.4077	-12.4077	-12.4077	-12.4077	5433.72	5433.72	5433.72	5433.72	9.64665e-13	5433.72
Sample 4					0	0	0		-12.4077	-12.4077	-12.4077		5433.72	5433.72	5433.72
Sample 4					0	0	0		-12.4077	-12.4077	-12.4077		5433.72	5433.72	5433.72
Sample 5				Sample 5	0	0	0	0	-12.4077	-12.4077	-12.4077	-12.4077	5433.72	5433.72	5433.72	5433.72	9.64665e-13	5433.72
Sample 5					0	0	0		-12.4077	-12.4077	-12.4077		5433.72	5433.72	5433.72
Sample 5					0	0	0		-12.4077	-12.4077	-12.4077		5433.72	5433.72	5433.72
Sample 6				Sample 6	0	0	0	0	-12.4077	-12.4077	-12.4077	-12.4077	5433.72	5433.72	5433.72	5433.72	9.64665e-13	5433.72
Sample 6					0	0	0		-12.4077	-12.4077	-12.4077		5433.72	5433.72	5433.72
Sample 6					0	0	0		-12.4077	-12.4077	-12.4077		5433.72	5433.72	5433.72
Sample 7				Sample 7	0	0	0	0	-12.4077	-12.4077	-12.4077	-12.4077	5433.72	5433.72	5433.72	5433.72	9.64665e-13	5433.72
Sample 7					0	0	0		-12.4077	-12.4077	-12.4077		5433.72	5433.72	5433.72
Sample 7					0	0	0		-12.4077	-12.4077	-12.4077		5433.72	5433.72	5433.72
Sample 8				Sample 8	0	0	0	0	-12.4077	-12.4077	-12.4077	-12.4077	5433.72	5433.72	5433.72	5433.72	9.64665e-13	5433.72
Sample 8					0	0	0		-12.4077	-12.4077	-12.4077		5433.72	5433.72	5433.72
Sample 8					0	0	0		-12.4077	-12.4077	-12.4077		5433.72	5433.72	5433.72
Sample 9				Sample 9	0	0	0	0	-12.4077	-12.4077	-12.4077	-12.4077	5433.72	5433.72	5433.72	5433.72	9.64665e-13	5433.72
Sample 9					0	0	0		-12.4077	-12.4077	-12.4077		5433.72	5433.72	5433.72
Sample 9					0	0	0		-12.4077	-12.4077	-12.4077		5433.72	5433.72	5433.72
	Value	SD	t-test
control	1	0.282062
eif2b4sa17367/sa17367	0.65108	0.104033	0.00192253
Sample 3	5433.72	9.64665e-13	4.50669e-36
Sample 4	5433.72	9.64665e-13	4.50669e-36
Sample 5	5433.72	9.64665e-13	4.50669e-36
Sample 6	5433.72	9.64665e-13	4.50669e-36
Sample 7	5433.72	9.64665e-13	4.50669e-36
Sample 8	5433.72	9.64665e-13	4.50669e-36
Sample 9	5433.72	9.64665e-13	4.50669e-36
