# Supplementary material for: Vanishing white matter disease expression of truncated EIF2B5 activates induced stress response
Source: eLife. 2020 Dec 10;9:e56319. doi: 10.7554/eLife.56319 (PMC7752137; doi:10.7554/eLife.56319)
Supplement: Figure 2—source data 5. [file elife-56319-fig2-data5.xlsx]

## Sheet: Sheet1
Survival to 10 dpf
	eif2b4 het incross
dpf	# dead	# alive
1	0	100
2	2	98
3	0	98
4	0	98
5	0	98
6	0	98
7	25	73
8	3	70
9	7	63
10	6	57
	eif2b4
	n	%
wt	17	32.0755
het	34	64.1509
mut	2	3.77358
TOTAL	53
