# Supplementary material for: Vanishing white matter disease expression of truncated EIF2B5 activates induced stress response
Source: eLife. 2020 Dec 10;9:e56319. doi: 10.7554/eLife.56319 (PMC7752137; doi:10.7554/eLife.56319)
Supplement: Figure 2—source data 6. [file elife-56319-fig2-data6.xlsx]

## Sheet: Sheet1
		eif2b5 zc103 het incross
	dpf	# dead	# alive
	1	0	100
	2	0	100
	3	0	100
	4	0	100
	5	1	99
	6	2	97
	7	0	97
	8	5	92
	9	3	89
	10	0	89
	eif2b5 zc103
	n	%
wt	25	0.284091
het	41	0.465909
mut	22	0.25
unknown	0	0
TOTAL	88
