# Supplementary material for: Vanishing white matter disease expression of truncated EIF2B5 activates induced stress response
Source: eLife. 2020 Dec 10;9:e56319. doi: 10.7554/eLife.56319 (PMC7752137; doi:10.7554/eLife.56319)
Supplement: Figure 3—source data 1. [file elife-56319-fig3-data1.xlsx]

## Sheet: Sheet1
TUNEL counts															Ordinary 1 way ANOVA							Ordinary 1 way ANOVA: Multiple comparisons
								eif2b5A9 ctrl	eif2b5A9 MUT	eif2b5A3 ctrl	eif2b5A3 MUT	eif2b2 ctrl	eif2b2 MUT
eif2b5A9 ctrl	eif2b5A9 MUT	eif2b5A3 ctrl	eif2b5A3 MUT	eif2b2 ctrl	eif2b2 MUT		Number of values	10	10	12	13	5	6		Table Analyzed	tunel						Number of families	1
3	34	6	108	63	131										Data sets analyzed	A-F						Number of comparisons per family	15
12	55	16	72	10	236		Minimum	1	34	2	57	10	130									Alpha	0.05
12	169	20	141	29	262		Maximum	35	246	36	313	65	262		ANOVA summary
7	244	16	147	65	130		Range	34	212	34	256	55	132		F	19.4						Tukey's multiple comparisons test	Mean Diff.	95.00% CI of diff.	Significant?	Summary
16	127	31	114	20	197										P value	<0.0001						eif2b5A9 ctrl vs. eif2b5A9 MUT	-116.9	-190.3 to -43.52	Yes	***		A-B
35	153	30	167		261		Mean	12.2	129.1	18.67	163.7	37.4	202.8		P value summary	****						eif2b5A9 ctrl vs. eif2b5A3 ctrl	-6.467	-76.72 to 63.79	No	ns		A-C
6	246	2	57				Std. Deviation	9.762	79.47	10.65	78.18	25.21	60.8		Significant diff. among means (P < 0.05)?	Yes						eif2b5A9 ctrl vs. eif2b5A3 MUT	-151.5	-220.5 to -82.48	Yes	****		A-D
19	160	18	196				Std. Error of Mean	3.087	25.13	3.073	21.68	11.27	24.82		R squared	0.6598						eif2b5A9 ctrl vs. eif2b2 ctrl	-25.2	-115.1 to 64.67	No	ns		A-E
11	40	5	310																			eif2b5A9 ctrl vs. eif2b2 MUT	-190.6	-275.4 to -105.9	Yes	****		A-F
1	63	21	142				Lower 95% CI of mean	5.217	72.25	11.9	116.4	6.104	139		Brown-Forsythe test							eif2b5A9 MUT vs. eif2b5A3 ctrl	110.4	40.18 to 180.7	Yes	***		B-C
		36	313				Upper 95% CI of mean	19.18	185.9	25.43	210.9	68.7	266.6		F (DFn, DFd)	5.630 (5, 50)						eif2b5A9 MUT vs. eif2b5A3 MUT	-34.59	-103.6 to 34.42	No	ns		B-D
		23	154												P value	0.0003						eif2b5A9 MUT vs. eif2b2 ctrl	91.7	1.833 to 181.6	Yes	*		B-E
			207												P value summary	***						eif2b5A9 MUT vs. eif2b2 MUT	-73.73	-158.5 to 10.99	No	ns		B-F
															Are SDs significantly different (P < 0.05)?	Yes						eif2b5A3 ctrl vs. eif2b5A3 MUT	-145	-210.7 to -79.34	Yes	****		C-D
																						eif2b5A3 ctrl vs. eif2b2 ctrl	-18.73	-106.1 to 68.60	No	ns		C-E
															Bartlett's test							eif2b5A3 ctrl vs. eif2b2 MUT	-184.2	-266.2 to -102.1	Yes	****		C-F
															Bartlett's statistic (corrected)	55.06						eif2b5A3 MUT vs. eif2b2 ctrl	126.3	39.95 to 212.6	Yes	***		D-E
															P value	<0.0001						eif2b5A3 MUT vs. eif2b2 MUT	-39.14	-120.1 to 41.84	No	ns		D-F
															P value summary	****						eif2b2 ctrl vs. eif2b2 MUT	-165.4	-264.8 to -66.08	Yes	***		E-F
															Are SDs significantly different (P < 0.05)?	Yes
																						Test details	Mean 1	Mean 2	Mean Diff.	SE of diff.	n1	n2	q	DF
															ANOVA table	SS	DF	MS	F (DFn, DFd)	P value		eif2b5A9 ctrl vs. eif2b5A9 MUT	12.2	129.1	-116.9	24.76	10	10	6.676	50
															Treatment (between columns)	297400	5	59480	F (5, 50) = 19.40	P<0.0001		eif2b5A9 ctrl vs. eif2b5A3 ctrl	12.2	18.67	-6.467	23.71	10	12	0.3857	50
															Residual (within columns)	153310	50	3066				eif2b5A9 ctrl vs. eif2b5A3 MUT	12.2	163.7	-151.5	23.29	10	13	9.198	50
															Total	450710	55					eif2b5A9 ctrl vs. eif2b2 ctrl	12.2	37.4	-25.2	30.33	10	5	1.175	50
																						eif2b5A9 ctrl vs. eif2b2 MUT	12.2	202.8	-190.6	28.59	10	6	9.428	50
															Data summary							eif2b5A9 MUT vs. eif2b5A3 ctrl	129.1	18.67	110.4	23.71	10	12	6.587	50
															Number of treatments (columns)	6						eif2b5A9 MUT vs. eif2b5A3 MUT	129.1	163.7	-34.59	23.29	10	13	2.1	50
															Number of values (total)	56						eif2b5A9 MUT vs. eif2b2 ctrl	129.1	37.4	91.7	30.33	10	5	4.276	50
																						eif2b5A9 MUT vs. eif2b2 MUT	129.1	202.8	-73.73	28.59	10	6	3.647	50
																						eif2b5A3 ctrl vs. eif2b5A3 MUT	18.67	163.7	-145	22.17	12	13	9.252	50
																						eif2b5A3 ctrl vs. eif2b2 ctrl	18.67	37.4	-18.73	29.47	12	5	0.8988	50
																						eif2b5A3 ctrl vs. eif2b2 MUT	18.67	202.8	-184.2	27.69	12	6	9.407	50
																						eif2b5A3 MUT vs. eif2b2 ctrl	163.7	37.4	126.3	29.14	13	5	6.129	50
																						eif2b5A3 MUT vs. eif2b2 MUT	163.7	202.8	-39.14	27.33	13	6	2.025	50
																						eif2b2 ctrl vs. eif2b2 MUT	37.4	202.8	-165.4	33.53	5	6	6.978	50
