# Supplementary material for: Vanishing white matter disease expression of truncated EIF2B5 activates induced stress response
Source: eLife. 2020 Dec 10;9:e56319. doi: 10.7554/eLife.56319 (PMC7752137; doi:10.7554/eLife.56319)
Supplement: Figure 3—source data 2. [file elife-56319-fig3-data2.xlsx]

## Sheet: Sheet1
PH3 counts															Ordinary 1 way ANOVA							Ordinary 1 way ANOVA: Multiple comparisons
eif2b5A9 ctrl	eif2b5A9 MUT	eif2b5A3 ctrl	eif2b5A3 MUT	eif2b2 ctrl	eif2b2 MUT			eif2b5A9 ctrl	eif2b5A9 MUT	eif2b5A3 ctrl	eif2b5A3 MUT	eif2b2 ctrl	eif2b2 MUT
218	205	326	209	243	214		Number of values	10	10	9	8	10	9		Table Analyzed	ph3						Number of families	1
265	197	285	234	335	215										Data sets analyzed	A-F						Number of comparisons per family	15
291	299	271	185	248	163		Minimum	188	197	247	185	217	136									Alpha	0.05
280	263	301	302	289	159		25% Percentile	250.3	203.8	261.5	215	241	154		ANOVA summary
326	306	274	297	270	136		Median	280.5	245.5	285	235	258	176		F	7.138						Tukey's multiple comparisons test	Mean Diff.	95.00% CI of diff.	Significant?	Summary
281	277	247	236	242	251		75% Percentile	299.8	293	313.5	285.3	300.5	214.5		P value	<0.0001						eif2b5A9 ctrl vs. eif2b5A9 MUT	25.9	-28.89 to 80.69	No	ns		A-B
291	228	252	233	238	176		Maximum	330	306	343	302	366	251		P value summary	****						eif2b5A9 ctrl vs. eif2b5A3 ctrl	-15.23	-71.52 to 41.06	No	ns		A-C
330	200	296	250	217	149										Significant diff. among means (P < 0.05)?	Yes						eif2b5A9 ctrl vs. eif2b5A3 MUT	29.85	-28.26 to 87.96	No	ns		A-D
261	206	343		366	205		Mean	273.1	247.2	288.3	243.3	271.6	185.3		R squared	0.4165						eif2b5A9 ctrl vs. eif2b2 ctrl	1.5	-53.29 to 56.29	No	ns		A-E
188	291			268			Std. Deviation	43.81	44.46	31.96	39.99	46.68	37.81									eif2b5A9 ctrl vs. eif2b2 MUT	87.77	31.48 to 144.1	Yes	***		A-F
							Std. Error of Mean	13.86	14.06	10.65	14.14	14.76	12.6		Brown-Forsythe test							eif2b5A9 MUT vs. eif2b5A3 ctrl	-41.13	-97.42 to 15.16	No	ns		B-C
															F (DFn, DFd)	0.4099 (5, 50)						eif2b5A9 MUT vs. eif2b5A3 MUT	3.95	-54.16 to 62.06	No	ns		B-D
							Lower 95% CI of mean	241.8	215.4	263.8	209.8	238.2	156.3		P value	0.8397						eif2b5A9 MUT vs. eif2b2 ctrl	-24.4	-79.19 to 30.39	No	ns		B-E
							Upper 95% CI of mean	304.4	279	312.9	276.7	305	214.4		P value summary	ns						eif2b5A9 MUT vs. eif2b2 MUT	61.87	5.575 to 118.2	Yes	*		B-F
															Are SDs significantly different (P < 0.05)?	No						eif2b5A3 ctrl vs. eif2b5A3 MUT	45.08	-14.45 to 104.6	No	ns		C-D
							Sum	2731	2472	2595	1946	2716	1668									eif2b5A3 ctrl vs. eif2b2 ctrl	16.73	-39.56 to 73.02	No	ns		C-E
															Bartlett's test							eif2b5A3 ctrl vs. eif2b2 MUT	103	45.25 to 160.8	Yes	****		C-F
															Bartlett's statistic (corrected)	1.419						eif2b5A3 MUT vs. eif2b2 ctrl	-28.35	-86.46 to 29.76	No	ns		D-E
															P value	0.9222						eif2b5A3 MUT vs. eif2b2 MUT	57.92	-1.615 to 117.4	No	ns		D-F
															P value summary	ns						eif2b2 ctrl vs. eif2b2 MUT	86.27	29.98 to 142.6	Yes	***		E-F
															Are SDs significantly different (P < 0.05)?	No
																						Test details	Mean 1	Mean 2	Mean Diff.	SE of diff.	n1	n2	q	DF
															ANOVA table	SS	DF	MS	F (DFn, DFd)	P value		eif2b5A9 ctrl vs. eif2b5A9 MUT	273.1	247.2	25.9	18.49	10	10	1.981	50
															Treatment (between columns)	61013	5	12203	F (5, 50) = 7.138	P<0.0001		eif2b5A9 ctrl vs. eif2b5A3 ctrl	273.1	288.3	-15.23	19	10	9	1.134	50
															Residual (within columns)	85480	50	1710				eif2b5A9 ctrl vs. eif2b5A3 MUT	273.1	243.3	29.85	19.61	10	8	2.152	50
															Total	146493	55					eif2b5A9 ctrl vs. eif2b2 ctrl	273.1	271.6	1.5	18.49	10	10	0.1147	50
																						eif2b5A9 ctrl vs. eif2b2 MUT	273.1	185.3	87.77	19	10	9	6.533	50
															Data summary							eif2b5A9 MUT vs. eif2b5A3 ctrl	247.2	288.3	-41.13	19	10	9	3.062	50
															Number of treatments (columns)	6						eif2b5A9 MUT vs. eif2b5A3 MUT	247.2	243.3	3.95	19.61	10	8	0.2848	50
															Number of values (total)	56						eif2b5A9 MUT vs. eif2b2 ctrl	247.2	271.6	-24.4	18.49	10	10	1.866	50
																						eif2b5A9 MUT vs. eif2b2 MUT	247.2	185.3	61.87	19	10	9	4.605	50
																						eif2b5A3 ctrl vs. eif2b5A3 MUT	288.3	243.3	45.08	20.09	9	8	3.173	50
																						eif2b5A3 ctrl vs. eif2b2 ctrl	288.3	271.6	16.73	19	9	10	1.246	50
																						eif2b5A3 ctrl vs. eif2b2 MUT	288.3	185.3	103	19.49	9	9	7.473	50
																						eif2b5A3 MUT vs. eif2b2 ctrl	243.3	271.6	-28.35	19.61	8	10	2.044	50
																						eif2b5A3 MUT vs. eif2b2 MUT	243.3	185.3	57.92	20.09	8	9	4.077	50
																						eif2b2 ctrl vs. eif2b2 MUT	271.6	185.3	86.27	19	10	9	6.422	50
