# Supplementary material for: Vanishing white matter disease expression of truncated EIF2B5 activates induced stress response
Source: eLife. 2020 Dec 10;9:e56319. doi: 10.7554/eLife.56319 (PMC7752137; doi:10.7554/eLife.56319)
Supplement: Figure 3—source data 3. [file elife-56319-fig3-data3.xlsx]

## Sheet: Sheet1
wt	A9 mutant	wt	A3 mutant	wt	2b2 mutant										wt	A9 mutant	wt	A3 mutant	wt	2b2 mutant
24	25	31	24	43	41		Table Analyzed	olig2+ counts						Number of values	7	7	5	5	5	5
28	29	49	18	44	34		Data sets analyzed	A-F
39	25	45	30	33	31									Minimum	24	18	29	18	33	31
37	39	29	34	40	42		ANOVA summary							Maximum	39	39	49	47	44	42
24	32	29	47	36	31		F	2.26						Range	15	21	20	29	11	11
31	18						P value	0.0759
32	18						P value summary	ns						Mean	30.71	26.57	36.6	30.6	39.2	35.8
							Significant diff. among means (P < 0.05)?	No						Std. Deviation	5.88	7.547	9.633	10.99	4.658	5.357
							R squared	0.2876						Std. Error of Mean	2.222	2.852	4.308	4.915	2.083	2.396
							Brown-Forsythe test							Lower 95% CI of mean	25.28	19.59	24.64	16.95	33.42	29.15
							F (DFn, DFd)	0.5697 (5, 28)						Upper 95% CI of mean	36.15	33.55	48.56	44.25	44.98	42.45
							P value	0.7225
							P value summary	ns
							Are SDs significantly different (P < 0.05)?	No
							Bartlett's test
							Bartlett's statistic (corrected)	4.435
							P value	0.4886
							P value summary	ns
							Are SDs significantly different (P < 0.05)?	No
							ANOVA table	SS	DF	MS	F (DFn, DFd)	P value
							Treatment (between columns)	647.9	5	129.6	F (5, 28) = 2.260	P=0.0759
							Residual (within columns)	1605	28	57.33
							Total	2253	33
							Data summary
							Number of treatments (columns)	6
							Number of values (total)	34
