# Supplementary material for: Vanishing white matter disease expression of truncated EIF2B5 activates induced stress response
Source: eLife. 2020 Dec 10;9:e56319. doi: 10.7554/eLife.56319 (PMC7752137; doi:10.7554/eLife.56319)
Supplement: Figure 3—source data 4. [file elife-56319-fig3-data4.xlsx]

## Sheet: Sheet1
control	eif2b5A9 MUT	control	eif2b5A3 Mutant	control	eif2b2 MUT												control	eif2b5A9 MUT	control	eif2b5A3 Mutant	control	eif2b2 MUT
0	0	1	18	1	4		Table Analyzed	hindbrain olig2+TUNEL+		Table Analyzed	hindbrain olig2+TUNEL+		Table Analyzed	hindbrain olig2+TUNEL+		Number of values	9	10	3	6	3	6
3	4	0	23	0	3
0	6	2	17	0	2		Column B	eif2b5A9 MUT		Column D	eif2b5A3 Mutant		Column F	eif2b2 MUT		Minimum	0	0	0	14	0	2
0	7		17		3		vs.	vs.		vs.	vs.		vs.	vs.		Maximum	3	7	2	23	1	5
0	3		16		4		Column A	control		Column C	control		Column E	control		Range	3	7	2	9	1	3
1	2		14		5
2	3						Unpaired t test			Unpaired t test			Unpaired t test			Mean	0.7778	3	1	17.5	0.3333	3.5
1	3						P value	0.016		P value	<0.0001		P value	0.002		Std. Deviation	1.093	2.261	1	3.017	0.5774	1.049
0	2						P value summary	*		P value summary	****		P value summary	**		Std. Error of Mean	0.3643	0.7149	0.5774	1.232	0.3333	0.4282
	0						Significantly different (P < 0.05)?	Yes		Significantly different (P < 0.05)?	Yes		Significantly different (P < 0.05)?	Yes
							One- or two-tailed P value?	Two-tailed		One- or two-tailed P value?	Two-tailed		One- or two-tailed P value?	Two-tailed		Lower 95% CI of mean	-0.0623	1.383	-1.484	14.33	-1.101	2.399
							t, df	t=2.675, df=17		t, df	t=8.958, df=7		t, df	t=4.771, df=7		Upper 95% CI of mean	1.618	4.617	3.484	20.67	1.768	4.601
							How big is the difference?			How big is the difference?			How big is the difference?
							Mean of column A	0.7778		Mean of column C	1		Mean of column E	0.3333
							Mean of column B	3		Mean of column D	17.5		Mean of column F	3.5
							Difference between means (B - A) ± SEM	2.222 ± 0.8306		Difference between means (D - C) ± SEM	16.50 ± 1.842		Difference between means (F - E) ± SEM	3.167 ± 0.6637
							95% confidence interval	0.4698 to 3.975		95% confidence interval	12.14 to 20.86		95% confidence interval	1.597 to 4.736
							R squared (eta squared)	0.2963		R squared (eta squared)	0.9198		R squared (eta squared)	0.7648
							F test to compare variances			F test to compare variances			F test to compare variances
							F, DFn, Dfd	4.279, 9, 8		F, DFn, Dfd	9.100, 5, 2		F, DFn, Dfd	3.300, 5, 2
							P value	0.0527		P value	0.2039		P value	0.4975
							P value summary	ns		P value summary	ns		P value summary	ns
							Significantly different (P < 0.05)?	No		Significantly different (P < 0.05)?	No		Significantly different (P < 0.05)?	No
							Data analyzed			Data analyzed			Data analyzed
							Sample size, column A	9		Sample size, column C	3		Sample size, column E	3
							Sample size, column B	10		Sample size, column D	6		Sample size, column F	6
