# Supplementary material for: Vanishing white matter disease expression of truncated EIF2B5 activates induced stress response
Source: eLife. 2020 Dec 10;9:e56319. doi: 10.7554/eLife.56319 (PMC7752137; doi:10.7554/eLife.56319)
Supplement: Figure 4—source data 1. [file elife-56319-fig4-data1.xlsx]

## Sheet: olig1+ and TUNEL+ cell count
control	eif2b5zc103/zc103	control	eif2b5z102/zc102	control	eif2b2sa17223/sa17223
0	1	1	8	0	1
0	3	0	0	0	1
1	4	0	1	1	4
0	2	1	3	0	1
1	0	0	12	1	9
0	1	0	6	0	4
		1	0	0	4
		0			7
		1			0
		0			2
		0
		0
		0

## Sheet: mag cell count in 5 ss
control	eif2b5zc103/zc103	control	eif2b5z102/zc102	control	eif2b2sa17223/sa17223
5	15	5	3	5	3
5	2	4	5	1	4
2	6	9	5	6	4
3	9	9	11	7	1
9	2	3	0	5	0
14	1	10	10	0	2
7	5	0	7	7	5
11	3	3	8	5	1
4	1	2			2
3	8	3			5
	9	0			0
		8
		5
		4
