# Supplementary material for: Vanishing white matter disease expression of truncated EIF2B5 activates induced stress response
Source: eLife. 2020 Dec 10;9:e56319. doi: 10.7554/eLife.56319 (PMC7752137; doi:10.7554/eLife.56319)
Supplement: Figure 5—source data 1. [file elife-56319-fig5-data1.xlsx]

## Sheet: ZRF1-pH3
eif2b5zc102 ZRF PH3	Blinded Name	TECTUM	MIDLINE	EYES		eif2b5zc103 ZRF PH3	Blinded Name	TECTUM	MIDLINE	EYES		eif2B2sa17223 ZRF PH3	Blinded Name	TECTUM	MIDLINE	EYES
wt9	1	0	2	11		mut10	1	0	6	1		mut3	1	2	15	2
wt4	2	0	5	0		mut2	2	1	4	0		mut6	2	0	7	0
wt2	3	0	2	0		mut8	3	0	4	0		wt1	3	0	2	0
wt7	4	0	0	0		wt7	4	2	3	2		mut2	4	0	4	0
mut4	5	0	13	1		mut4	5	1	4	4		wt2	5	0	3	0
wt5	6	0	2	7		wt10	10	0	7	0		mut4	6	5	12	0
mut2	7	0	10	3		mut3	11	0	10	1		mut1	7	0	1	0
mut5	8	1	12	1		mut7	12	0	4	0		wt4	8	0	4	1
mut1	9	2	19	4		mut9	13	0	5	0		wt5	9	0	1	0
wt10	10	6	4	15		wt6	14	0	6	0		wt3	10	3	9	4
mut3	11	0	4	1		mut6	15	2	16	6

## Sheet: HuC.D-pH3
eif2b5zc102 HUC PH3		TECTUM	EYES		eif2b5zc103 HUC PH3		TECTUM	EYES		eif2B2sa17223 HUC PH3		TECTUM	EYES
mut1	1	28	11		wt4	1	111	67		mut5	1	121	54
wt2	2	89	20		mut1	2	103	73		mut7	2	13	9
mut2	3	21	4		mut2	3	81	51		mut6	3	30	20
wt3	4	94	88		wt3	4	109	46		wt3	4	76	37
mut4	5	19	26		wt5	5	71	32		wt4	5	96	10
wt4	6	93	42		wt2	6	69	51		wt6	6	76	33
mut7	7	14	8		wt1	7	62	35		wt2	7	101	43
wt5	8	87	15		mut3	8	88	23		mut2	8	16	5
wt6	9	88	59							wt1	9	103	17
mut10	10	17	21							mut1	10	21	10

## Sheet: apoeb-pH3
eif2b5zc102 apoeb pH3		TECTUM	MIDLINE	EYES		eif2b5zc103 apoeb pH3		TECTUM	MIDLINE	EYES		eif2b2sa17223 apoeb pH3		TECTUM	MIDLINE	EYES
	wt	3	3	0			wt	6	4	1			wt	9	4	0
	wt	5	6	0			wt	9	5	0			wt	8	2	1
	wt	7	6	0			wt	13	8	0			wt	8	2	1
	wt	4	5	1			wt	8	5	0			wt	8	2	2
	wt	9	4	2			wt	16	4	0			wt	1	2	1
	wt	9	3	0			wt	17	5	1			wt	4	4	1
	wt	5	7	0			wt	13	3	0			wt	9	2	0
	wt	4	2	0			wt	2	2	0			wt	13	10	0
	wt	6	3	0			wt	10	2	0			mut	9	8	2
	wt	10	5	2			wt	24	4	2			mut	5	2	0
	mut	7	13	0			wt	8	5	0			mut	8	5	0
	mut	6	4	0			wt	8	6	0			mut	8	1	0
	mut	5	5	0			mut	7	6	1			mut	8	4	3
	mut	10	11	1			mut	6	7	0			mut	5	2	0
	mut	9	10	0			mut	7	5	1			mut	9	2	1
	mut	6	10	0			mut	9	4	0			mut	7	2	0
	mut	11	11	0			mut	11	7	0			mut	6	5	0
							mut	11	7	0			mut	5	0	1
							mut	14	9	1			mut	3	4	0
							mut	13	9	0			mut	11	5	0
