# Supplementary material for: Vanishing white matter disease expression of truncated EIF2B5 activates induced stress response
Source: eLife. 2020 Dec 10;9:e56319. doi: 10.7554/eLife.56319 (PMC7752137; doi:10.7554/eLife.56319)
Supplement: Figure 5—source data 2. [file elife-56319-fig5-data2.xlsx]

## Sheet: ZRF1-TUNEL
eif2b5zc102 ZRF PH3	Blinded Name	TECTUM	MIDLINE	EYES		eif2b5zc103 ZRF PH3	Blinded Name	TECTUM	MIDLINE	EYES		eif2B2sa17223 ZRF PH3	Blinded Name	TECTUM	MIDLINE	EYES
wt1	1	0	1	0		mut4	1	0	1	0		het2	1	0	3	0
wt6	2	0	2	1		mut1	2	0	1	0		wt1	2	1	4	0
mut9	3	0	12	0		mut3	3	0	2	0		mut8	3	0	6	0
wt4	4	0	1	0		wt6	4	0	0	0		mut5	4	0	16	0
mut6	5	0	8	0		wt1002	5	0	3	0		mut4	5	0	9	0
mut5	6	0	2	0		wt2	6	0	1	0		het1	6	1	2	0
wt3	7	0	1	0		wt8	7	0	6	0		mut6	7	0	7	0
mut3	8	1	5	0		wt4	9	0	1	0		mut7	8	0	3	0
mut1	9	0	9	1		mut2	10	0	3	0		wt2	9	0	7	0
wt2	10	0	3	2								wt3	10	0	8	0

## Sheet: HuC.D-TUNEL
eif2b5zc102 HUC PH3	TECTUM	EYES			eif2b5zc103 HUC PH3	TECTUM	EYES			eif2B2sa17223 HUC PH3	TECTUM	EYES
wt	13	2			wt	5	4			wt	3	0
wt	1	1			wt	5	0			wt	2	0
wt	5	0			wt	4	1			wt	0	1
wt	5	2			wt	1	1			wt	0	0
wt	4	0			wt	1	0			wt	3	1
wt	12	3			wt	2	0			mut	1	1
wt	8	1			mut	2	1			mut	4	0
wt	18	0			mut	3	0			mut	3	2
wt	2	0			mut	2	0			mut	1	0
mut	4	4			mut	3	2
mut	4	1			mut	2	0
mut	0	17			mut	3	1
mut	3	0
mut	5	3

## Sheet: apoeb-TUNEL
eif2b5zc102 apoeb pH3		TECTUM	MIDLINE	EYES		eif2b5zc103 apoeb pH3		TECTUM	MIDLINE	EYES		eif2b2sa17223 apoeb pH3		TECTUM	MIDLINE	EYES
	wt	1	1	0			wt	4	0	0			wt	0	0	2
	wt	0	0	0			wt	1	0	0			wt	1	0	0
	wt	0	0	0			wt	0	0	1			wt	1	0	0
	wt	0	0	3			wt	0	0	0			wt	2	0	0
	wt	0	0	0			wt	0	0	0			wt	0	0	0
	wt	3	0	0			wt	0	0	0			wt	2	0	2
	wt	0	0	1			wt	3	0	0			wt	3	1	0
	wt	1	0	0			wt	0	1	0			wt	0	0	0
	wt	3	3	4			wt	2	1	0			mut	0	0	0
	wt	2	1	0			wt	1	0	0			mut	4	3	1
	wt	0	0	0			wt	0	0	0			mut	2	0	1
	mut	2	2	0			mut	4	0	3			mut	5	0	0
	mut	2	2	0			mut	3	0	0			mut	0	0	0
	mut	3	1	1			mut	4	6	2			mut	0	0	0
	mut	0	1	0			mut	0	0	0			mut	1	0	0
	mut	0	0	0			mut	0	0	0			mut	3	0	3
							mut	0	0	0			mut	6	3	3
							mut	0	0	0
							mut	6	0	0
							mut	3	0	2
