# Supplementary material for: Vanishing white matter disease expression of truncated EIF2B5 activates induced stress response
Source: eLife. 2020 Dec 10;9:e56319. doi: 10.7554/eLife.56319 (PMC7752137; doi:10.7554/eLife.56319)
Supplement: Figure 6—source data 1. [file elife-56319-fig6-data1.xlsx]

## Sheet: Sheet1
WT	myelin	axon	axon/myelin		A9 MUT	myelin	axon	axon/myelin
fish 1; image G	3.509	1.957	0.557709		fish 1; image 10	1.124	0.672	0.597865
	1.802	0.484	0.26859			1.698	1.083	0.637809
	3.568	2.607	0.730661			1.564	1.012	0.647059
	6.103	3.486	0.571194			1.426	0.935	0.65568
	2.978	2.08	0.698455			1.545	1.007	0.65178
	1.342	0.785	0.584948			1.827	1.161	0.635468
	1.507	0.96	0.637027			1.723	1.098	0.637261
	3.068	2.058	0.670795			1.086	0.681	0.627072
	1.668	0.802	0.480815			1.286	0.788	0.612753
	4.954	3.05	0.615664			1.306	0.751	0.575038
	2.293	1.497	0.652857			1.498	0.989	0.660214
	2.406	1.59	0.660848			1.652	1.05	0.635593
	2.864	1.867	0.651885			1.742	0.908	0.52124
	1.906	1.305	0.68468			1.384	0.845	0.610549
	3.325	2.376	0.714586			2.016	1.342	0.665675
	1.723	1.094	0.634939			1.684	0.959	0.569477
	1.211	0.664	0.548307			1.338	0.714	0.533632
	2.612	1.721	0.658882			1.64	1.024	0.62439
	2.285	1.413	0.618381			1.273	0.83	0.652003
	2.143	1.267	0.591227			1.273	0.806	0.63315
fish 1; image I	5.338	3.08	0.576995			1.194	0.789	0.660804
	1.757	1.167	0.6642			1.544	0.876	0.567358
	1.998	1.139	0.57007			1.297	0.736	0.567463
	2.942	1.513	0.514276			2.069	1.099	0.531174
	1.943	1.342	0.690685			1.321	0.854	0.64648
	1.703	1.109	0.651204			1.49	0.931	0.624832
	2.519	1.247	0.495038			1.551	0.944	0.60864
	1.414	0.774	0.547383			0.983	0.557	0.566633
	1.837	1.07	0.582471			1.469	0.859	0.584752
	1.419	0.929	0.654686			1.453	0.978	0.67309
	1.517	0.765	0.504285			1.694	0.967	0.570838
	2.65	1.728	0.652075			1.755	1.282	0.730484
	1.608	1.048	0.651741			1.683	1.214	0.721331
	1.637	1.01	0.616982			1.514	0.971	0.641347
	1.462	0.855	0.584815			1.887	1.21	0.641229
	2.058	1.564	0.759961			2.095	1.292	0.616706
	2.572	1.777	0.690902			1.34	0.89	0.664179
	2.129	1.455	0.683419			1.283	0.769	0.599376
fish 2; image E	5.143	3.287	0.639121			1.947	1.329	0.682589
	2.122	1.406	0.662582			1.678	0.856	0.510131
	1.891	1.215	0.642517			1.568	1.099	0.700893
	2.397	1.686	0.703379			1.475	0.857	0.581017
	1.603	1.147	0.715533			1.568	0.919	0.586097
	1.702	1.133	0.665687			3.026	2.142	0.707865
	2.423	1.663	0.686339			1.274	0.687	0.539246
	1.635	0.964	0.589602			1.407	0.821	0.583511
	1.655	1.015	0.613293		fish 1; image 1	1.303	0.955	0.732924
	2.592	1.657	0.639275			1.725	1.325	0.768116
	1.725	1.255	0.727536			1.678	1.019	0.607271
fish 2; image F	4.318	2.608	0.603983			1.935	1.088	0.562274
	1.849	0.445	0.240671			1.647	1.087	0.659988
	1.667	1.051	0.630474			1.656	1.107	0.668478
	2.185	1.333	0.610069			1.532	0.978	0.638381
	2.241	1.396	0.622936			1.501	1.048	0.698201
	2.575	1.88	0.730097			1.385	0.914	0.659928
	1.622	1.12	0.690506			1.039	0.77	0.741097
	2.128	1.383	0.649906			1.124	0.707	0.629004
	1.436	0.88	0.612813			1.27	0.87	0.685039
	1.698	1.021	0.601296			1.643	1.043	0.634814
	1.759	1.206	0.685617			1.554	0.929	0.597812
	1.649	1.028	0.623408			0.995	0.632	0.635176
	2.108	1.365	0.647533			1.271	0.85	0.668765
	1.769	1.062	0.600339			1.297	0.831	0.640709
	1.801	1.228	0.681843			1.126	0.884	0.78508
	1.224	0.845	0.690359			1.347	1.011	0.750557
	1.509	0.958	0.634858			1.099	0.805	0.732484
	1.264	0.8	0.632911			1.382	0.861	0.62301
	1.329	0.907	0.682468			1.275	0.807	0.632941
	1.925	1.351	0.701818			1.826	1.042	0.570646
	1.857	1.232	0.663436			2.067	1.094	0.529269
	1.387	0.894	0.644557			1.37	1.033	0.754015
	1.64	1.032	0.629268			2.003	1.44	0.718922
fish 3; image J	3.203	2.001	0.624727			1.487	0.893	0.600538
	1.659	0.753	0.453888			1.691	1.168	0.690716
	1.569	0.771	0.491396			1.635	1.233	0.754128
	2.414	1.31	0.542668			1.926	1.253	0.650571
	1.622	0.836	0.515413		fish 3; image 4	1.055	0.899	0.852133
	1.799	0.926	0.51473			1.501	1.08	0.71952
	1.916	1.228	0.640919			1.706	1.181	0.692263
	2.264	1.146	0.506184			1.495	0.954	0.638127
	1.385	0.801	0.578339			1.565	1.032	0.659425
	1.865	1.01	0.541555			1.298	1.019	0.785054
	2.004	1.108	0.552894			1.326	0.835	0.629713
	1.673	0.943	0.563658			1.491	1.095	0.734406
	1.384	0.758	0.547688			1.554	1.022	0.657658
	1.68	0.93	0.553571			1.978	1.289	0.651668
	1.6	0.823	0.514375			1.349	0.932	0.690882
	2.187	1.326	0.60631			1.305	0.915	0.701149
	1.459	0.986	0.675805			1.471	1.05	0.7138
	1.538	0.912	0.592978			1.587	1.162	0.732199
	1.831	0.858	0.468596			1.322	0.961	0.726929
	1.796	1.042	0.580178			1.574	1.106	0.702668
	1.979	1.141	0.576554			1.989	1.416	0.711916
	1.84	0.952	0.517391			1.592	1.168	0.733668
	2.499	1.507	0.603041			1.674	1.278	0.763441
	2.336	1.342	0.574486			1.098	0.737	0.67122
	1.648	1.141	0.692354			1.442	1.006	0.697642
	2.592	1.518	0.585648			1.072	0.769	0.717351
	1.493	0.871	0.583389			2.144	1.327	0.618937
	2.955	2.006	0.678849			1.865	1.489	0.798391
fish 3; image O	2.144	0.974	0.454291			1.214	1.025	0.844316
	1.587	0.791	0.498425			1.084	0.751	0.692804
	2.895	1.417	0.489465			1.655	1.214	0.733535
	1.884	0.592	0.314225			1.665	1.043	0.626426
	2.532	1.304	0.515008			2.139	1.567	0.732585
	2.61	1.572	0.602299			1.553	1.047	0.674179
	1.803	1.105	0.612867			1.218	0.987	0.810345
	1.654	0.892	0.539299			2.182	1.703	0.780477
	3.13	1.651	0.527476			2.015	1.254	0.622333
	2.78	1.727	0.621223			1.593	1.239	0.777778
	2.055	0.934	0.454501			2.178	1.573	0.722222
	2.638	1.824	0.691433		fish 3; image 5	2.379	1.956	0.822194
	1.582	0.945	0.597345			2.128	1.591	0.74765
	3.956	2.574	0.650657			1.326	0.928	0.699849
	2.576	1.349	0.52368			1.638	1.051	0.641636
	1.742	0.744	0.427095			1.579	1.079	0.683344
	1.728	1.133	0.655671			1.476	1.083	0.73374
	1.807	1.077	0.596015			0.971	0.592	0.609681
	2.421	1.355	0.559686			0.955	0.665	0.696335
	1.63	0.976	0.598773			1.088	0.816	0.75
fish 3; image P	1.921	1.079	0.561687			1.493	1.196	0.801072
	2.354	1.348	0.572642			1.623	1.104	0.680222
	1.606	0.88	0.547945			1.085	0.828	0.763134
	1.902	0.973	0.511567			1.286	0.865	0.672628
	1.406	0.759	0.539829			1.595	1.116	0.699687
	1.334	0.871	0.652924			1.347	1.003	0.744618
	2.462	1.432	0.581641			1.716	1.108	0.645688
	2.233	1.178	0.527541			1.798	1.383	0.769188
	2.301	1.094	0.475445			1.239	0.86	0.694108
	2.38	1.588	0.667227			1.353	0.862	0.637103
	1.857	0.859	0.462574			1.81	1.196	0.660773
	2.212	1.147	0.518535			1.916	1.329	0.693633
	2.633	1.361	0.516901		fish 4; image 21	4.195	3.614	0.861502
	2.093	1.177	0.562351			1.286	0.933	0.725505
	2.29	1.168	0.510044			1.546	1.236	0.799483
	2.263	1.265	0.558992			2.103	1.398	0.664765
	1.705	1.05	0.615836			2.581	2.255	0.873692
	1.992	1.032	0.518072			3.673	2.674	0.728015
	2.556	1.316	0.514867			2.108	1.226	0.581594
	1.489	0.951	0.638684			1.347	0.96	0.712695
	2.235	1.523	0.681432			1.169	0.815	0.697177
			0.593358	average		1.651	1.278	0.774076
			0.0850569	SD		1.855	1.274	0.686792
						1.072	0.772	0.720149
						1.583	1.072	0.677195
						1.288	0.902	0.700311
						1.205	0.926	0.768465
						1.723	1.191	0.691236
						1.579	1.221	0.773274
						1.443	1.057	0.732502
						2.08	1.628	0.782692
						1.996	1.674	0.838677
						2.9	2.076	0.715862
						1.696	1.326	0.78184
						2.252	1.849	0.821048
					fish 4; image 29	1.298	0.981	0.755778
						1.888	1.375	0.728284
						1.867	1.349	0.72255
						2.311	1.885	0.815664
						1.296	0.876	0.675926
						1.272	0.889	0.698899
						1.403	1.077	0.767641
						1.138	0.789	0.693322
						1.596	1.205	0.755013
						1.84	1.472	0.8
						1.529	1.108	0.724657
						2.078	1.394	0.670837
						1.213	0.943	0.777411
						2.021	1.515	0.749629
						1.048	0.791	0.754771
						2.031	1.546	0.761201
						1.688	1.361	0.80628
						2.138	1.679	0.785313
						1.776	1.491	0.839527
						1.861	1.388	0.745836
						2.203	1.475	0.669542
						1.59	1.25	0.786164
						1.628	1.122	0.689189
						2.009	1.731	0.861623
						1.579	1.17	0.740975
								0.690337	average
								0.0760541	SD
								2.18647e-22	T Test
