# Supplementary material for: Vanishing white matter disease expression of truncated EIF2B5 activates induced stress response
Source: eLife. 2020 Dec 10;9:e56319. doi: 10.7554/eLife.56319 (PMC7752137; doi:10.7554/eLife.56319)
Supplement: Figure 7—source data 1. [file elife-56319-fig7-data1.xlsx]

## Sheet: Sheet1
											Ordinary 1 way ANOVA							Ordinary 1 way ANOVA: Multiple comparisons
						control	eif2B2sa17/sa17	Control	eif2B2sa17/sa17 rescue
control	eif2B2sa17/sa17	Control	eif2B2sa17/sa17 rescue		Number of values	9	8	10	10		Table Analyzed	Data 1						Number of families	1
20	96	48	43								Data sets analyzed	A-D						Number of comparisons per family	6
41	57	48	12		Minimum	7	30	23	11									Alpha	0.05
7	88	40	27		Maximum	41	112	59	50		ANOVA summary
17	99	39	11		Range	34	82	36	39		F	23.01						Tukey's multiple comparisons test	Mean Diff.	95.00% CI of diff.	Significant?	Summary	Adjusted P Value
26	112	59	44								P value	<0.0001						control vs. eif2B2sa17/sa17	-60.49	-81.86 to -39.11	Yes	****	<0.0001	A-B
29	30	39	50		Mean	23.89	84.38	42.9	31.5		P value summary	****						control vs. Control	-19.01	-39.22 to 1.199	No	ns	0.0713	A-C
33	86	34	36		Std. Deviation	10.13	27.64	10.84	12.92		Significant diff. among means (P < 0.05)?	Yes						control vs. eif2B2sa17/sa17 rescue	-7.611	-27.82 to 12.60	No	ns	0.7398	A-D
26	107	41	28		Std. Error of Mean	3.377	9.77	3.427	4.086		R squared	0.6766						eif2B2sa17/sa17 vs. Control	41.48	20.61 to 62.34	Yes	****	<0.0001	B-C
16		58	29															eif2B2sa17/sa17 vs. eif2B2sa17/sa17 rescue	52.88	32.01 to 73.74	Yes	****	<0.0001	B-D
		23	35		Lower 95% CI of mean	16.1	61.27	35.15	22.26		Brown-Forsythe test							Control vs. eif2B2sa17/sa17 rescue	11.4	-8.271 to 31.07	No	ns	0.4104	C-D
					Upper 95% CI of mean	31.68	107.5	50.65	40.74		F (DFn, DFd)	1.920 (3, 33)
											P value	0.1456						Test details	Mean 1	Mean 2	Mean Diff.	SE of diff.	n1	n2	q	DF
											P value summary	ns						control vs. eif2B2sa17/sa17	23.89	84.38	-60.49	7.902	9	8	10.83	33
											Are SDs significantly different (P < 0.05)?	No						control vs. Control	23.89	42.9	-19.01	7.472	9	10	3.598	33
																		control vs. eif2B2sa17/sa17 rescue	23.89	31.5	-7.611	7.472	9	10	1.441	33
											Bartlett's test							eif2B2sa17/sa17 vs. Control	84.38	42.9	41.48	7.713	8	10	7.604	33
											Bartlett's statistic (corrected)	11.03						eif2B2sa17/sa17 vs. eif2B2sa17/sa17 rescue	84.38	31.5	52.88	7.713	8	10	9.694	33
											P value	0.0116						Control vs. eif2B2sa17/sa17 rescue	42.9	31.5	11.4	7.272	10	10	2.217	33
											P value summary	*
											Are SDs significantly different (P < 0.05)?	Yes
											ANOVA table	SS	DF	MS	F (DFn, DFd)	P value
											Treatment (between columns)	18255	3	6085	F (3, 33) = 23.01	P<0.0001
											Residual (within columns)	8726	33	264.4
											Total	26981	36
											Data summary
											Number of treatments (columns)	4
											Number of values (total)	37
