# Supplementary material for: Vanishing white matter disease expression of truncated EIF2B5 activates induced stress response
Source: eLife. 2020 Dec 10;9:e56319. doi: 10.7554/eLife.56319 (PMC7752137; doi:10.7554/eLife.56319)
Supplement: Figure 7—source data 2. [file elife-56319-fig7-data2.xlsx]

## Sheet: Analysis
			Independent Variable	Distance moved			Velocity			Movement
			Independent Variable	center-point			center-point			Moving / center-point
			genotype	Total (mm)			Mean (mm/s)			Cumulative Duration (s)
				Trial 1	Trial 2	Trial 3	Trial 1	Trial 2	Trial 3	Trial 1	Trial 2	Trial 3
Result 1	Trial 1	1	wt sibling	1170.24	10136.8	846.725	3.92066	33.8391	2.82392	244.16	234.92	181.92
Result 1	Trial 1	2	wt sibling	737.454	688.188	610.919	2.45949	2.2958	2.03748	130.08	142.16	125.32
Result 1	Trial 1	3	wt sibling	1093.76	1089.1	744.632	3.64781	3.63322	2.48343	226.68	224.76	152.4
Result 1	Trial 1	4	wt sibling	1024.2	934.532	1026.58	3.41582	3.1176	3.42375	167.4	177.88	190.96
Result 1	Trial 1	5	wt sibling	26.9058	24.7321	497.224	0.0897339	0.0825062	1.6583	2.76	0.76	116.08
Result 1	Trial 1	6	wt sibling	0.439274	86.2257	557.501	0.00146503	0.287649	1.85933	0	8.76	56.8
Result 1	Trial 1	7	wt sibling	917.887	563.529	811.021	3.06126	1.87993	2.70485	206.76	129.84	178.72
Result 1	Trial 1	8	wt sibling	548.701	598.556	600.331	1.82998	1.99678	2.00217	123.08	137.64	138.24
Result 1	Trial 1	9	wt sibling	699.556	549.227	516.17	2.3331	1.83222	1.72148	157.36	119.96	116.92
Result 1	Trial 1	10	wt sibling	735.198	807.116	830.986	2.45197	2.69254	2.77143	139.64	148.44	143.04
Result 1	Trial 1	11	wt sibling	427.826	300.97	376.618	1.42685	1.00404	1.25606	84.08	58.84	80.2
Result 1	Trial 1	12	wt sibling	895.967	508.912	652.702	2.98815	1.69773	2.17683	184.88	126.2	145.96
Result 1	Trial 1	13	wt sibling	566.132	638.804	620.734	1.88812	2.13105	2.07022	115.08	133.64	134.28
Result 1	Trial 1	14	wt sibling	823.83	917.221	1116.19	2.74757	3.05985	3.72261	129.24	160.76	178.32
Result 1	Trial 1	15	wt sibling	950.169	554.288	705.323	3.16892	1.84911	2.35233	206.72	129.8	162.52
Result 1	Trial 1	16	wt sibling	12468.7	240.001	439.857	41.668	0.800645	1.46697	218.24	49.92	94.52
Result 1	Trial 1	17	wt sibling	854.051	541.564	558.484	2.84836	1.80666	1.86261	188.96	121.08	129.76
Result 1	Trial 1	18	wt sibling	468.203	305.68	617.459	1.56151	1.01975	2.05929	107.08	76.44	146.4
Result 1	Trial 1	19	wt sibling	1773.65	340.987	379.338	5.92798	1.13753	1.26513	112.48	65.96	75
Result 1	Trial 1	20	wt sibling	801.23	450.319	401.972	2.67219	1.50226	1.34062	168.72	114	102.28
Result 1	Trial 1	21	wt sibling	712.601	962.429	694.29	2.3766	3.21067	2.31553	153.4	222.16	158.8
Result 1	Trial 1	22	wt sibling	663.634	453.044	614.142	2.2133	1.51136	2.04823	127.88	96.4	137.56
Result 1	Trial 1	23	wt sibling	660.502	493.36	477.542	2.20285	1.64585	1.59266	144.56	111.24	112.04
Result 1	Trial 1	24	wt sibling	740.606	439.074	342.041	2.47001	1.46475	1.14074	156.04	96.68	67.68
Result 1	Trial 1	25	wt sibling	1165.34	711.476	664.051	3.88653	2.37348	2.21468	189.4	126	118
Result 1	Trial 1	26	wt sibling	717.15	673.739	655.687	2.39178	2.2476	2.18679	149.72	151.52	151.12
Result 1	Trial 1	27	wt sibling	816.962	581.236	650.98	2.72466	1.939	2.17109	159.32	126.2	128.76
Result 1	Trial 1	28	wt sibling	705.316	892.365	770.59	2.35231	2.97693	2.57	128.24	220.88	157.76
Result 1	Trial 1	29	wt sibling	595.147	601.877	518.535	1.98488	2.00786	1.72937	126.04	135.76	128.4
Result 1	Trial 1	30	wt sibling	393.851	489.768	400.404	1.31354	1.63387	1.33539	90.52	120.04	93.32
Result 1	Trial 1	31	wt sibling	19.7363	59.2409	1301.07	0.0658227	0.197628	4.33921	0.56	5.52	188.36
Result 1	Trial 1	49	bactin:hEIF2B2-2A-GFP	247.11	6.13954	28.5261	0.82436	0.0204815	0.0951378	56.76	0	5.92
Result 1	Trial 1	50	bactin:hEIF2B2-2A-GFP	84.9085	164.011	574.598	0.283179	0.547143	1.91635	8.68	17.24	77.24
Result 1	Trial 1	51	bactin:hEIF2B2-2A-GFP	295.696	566.333	488.301	0.98618	1.88929	1.62854	36.64	80.56	49.32
Result 1	Trial 1	52	bactin:hEIF2B2-2A-GFP	9.28735	172.949	62.6696	0.0309744	0.576959	0.20901	1.36	21.96	3.56
Result 1	Trial 1	53	bactin:hEIF2B2-2A-GFP	589.579	755.338	710.471	1.96631	2.51981	2.3695	90.8	179.04	153.52
Result 1	Trial 1	54	bactin:hEIF2B2-2A-GFP	650.072	706.007	785.356	2.16806	2.35524	2.61925	105.96	142.44	158.16
Result 1	Trial 1	55	bactin:hEIF2B2-2A-GFP	0	0.218031	33.8553	0	0.000727353	0.112911	0	0	0.52
Result 1	Trial 1	56	bactin:hEIF2B2-2A-GFP	709.084	875.932	465.007	2.36488	2.92211	1.55085	148.52	213.6	113.92
Result 1	Trial 1	57	bactin:hEIF2B2-2A-GFP	190.275	449.632	1150.73	0.634589	1.49997	3.83781	47.92	57.68	164.72
Result 1	Trial 1	58	bactin:hEIF2B2-2A-GFP	237.344	113.495	0	0.79157	0.378619	0	44.2	6.16	0
Result 1	Trial 1	59	bactin:hEIF2B2-2A-GFP	577.01	669.979	836.42	1.92439	2.23505	2.78956	145.48	145.4	162.04
Result 1	Trial 1	60	bactin:hEIF2B2-2A-GFP	818.919	966.923	906.626	2.73119	3.22566	3.0237	185.84	211.88	180.56
Result 1	Trial 1	61	bactin:hEIF2B2-2A-GFP	360.849	80.2663	493.957	1.20347	0.267768	1.6474	64.52	5.04	85.76
Result 1	Trial 1	62	bactin:hEIF2B2-2A-GFP	24.5758	286.221	298.397	0.0819631	0.954834	0.995188	0.36	50.44	52.44
Result 1	Trial 1	63	bactin:hEIF2B2-2A-GFP	588.114	462.229	169.503	1.96143	1.542	0.565312	96.52	71.2	9.44
Result 1	Trial 1	64	bactin:hEIF2B2-2A-GFP	66.3791	31.62	186.625	0.221382	0.105484	0.622417	3.24	0.96	7.24
Result 1	Trial 1	65	bactin:hEIF2B2-2A-GFP	167.27	191.835	351.341	0.557863	0.639963	1.17176	19.92	12.28	39.44
Result 1	Trial 1	66	bactin:hEIF2B2-2A-GFP	27.7487	167.285	128.24	0.0925451	0.558062	0.427696	5.16	4.92	3.44
Result 1	Trial 1	67	bactin:hEIF2B2-2A-GFP	0	153.091	1.86953	0	0.510712	0.00623509	0	26.76	0
Result 1	Trial 1	68	bactin:hEIF2B2-2A-GFP	466.423	273.48	665.599	1.55557	0.912331	2.21985	100.48	58.32	159.68
Result 1	Trial 1	69	bactin:hEIF2B2-2A-GFP	480.351	282.913	414.263	1.60202	0.943797	1.38161	91.76	48.64	90.24
Result 1	Trial 1	70	bactin:hEIF2B2-2A-GFP	925.532	573.714	323.086	3.08675	1.91391	1.07753	196.16	121.16	64.48
Result 1	Trial 1	71	bactin:hEIF2B2-2A-GFP	586.449	909.907	778.343	1.95587	3.03545	2.59586	95.96	138.84	127.16
