# Supplementary material for: Vanishing white matter disease expression of truncated EIF2B5 activates induced stress response
Source: eLife. 2020 Dec 10;9:e56319. doi: 10.7554/eLife.56319 (PMC7752137; doi:10.7554/eLife.56319)
Supplement: Figure 8—source data 1. [file elife-56319-fig8-data1.xlsx]

## Sheet: Sheet1
zc102 and zc103 exon 12F+13R and exon 12F + intron 12R; normalized to 28S
	splicing	no splicing	control	splicing	no splicing	splicing	no splicing	splicing	no splicing	splicing	no splicing	splicing	no splicing	splicing	no splicing	splicing	no splicing	TTEST - not spliced
	exon12F+13R	exon12F+intron12R	28S	exon12F+13R	exon12F+intron12R	exon12F+13R	exon12F+intron12R	ddCt	ddCt	exon12F+13R	exon12F+intron12R	exon12F+13R	exon12F+intron12R	exon12F+13R	exon12F+intron12R	exon12F+13R	exon12F+intron12R	(vs wt; primer set 2)
	CT	CT	CT	dCT	dCT	average	average	normalized	normalized	fold change	fold change	average	average	STDEV	STDEV	SEM	SEM
zc 102 +/+	23.5501	29.619	7.01375	16.5364	22.6053	16.5776	22.7278	-0.0412238	-0.122587	1.02899	1.08869	1.00429	1.00692	0.112148	0.140409	0.0647489	0.0810651
	23.5517	29.7214	7.1143	16.4375	22.6071			-0.140167	-0.120738	1.10203	1.08729
	23.5296	29.7417	6.77056	16.759	22.9712			0.181391	0.243325	0.881852	0.844796
zc102 +/-	24.555	30.1944	7.30931	17.2457	22.8851	17.2322	22.743	0.66809	0.157273	0.629339	0.896718	0.635664	0.992364	0.0276149	0.0908799	0.0159435	0.0524695	0.887447
	24.614	30.0512	7.3274	17.2866	22.7238			0.708963	-0.00402907	0.61176	1.0028
	24.5194	29.9752	7.35518	17.1643	22.6201			0.586639	-0.107792	0.665892	1.07758
zc102 -/-	23.2544	28.7393	7.12441	16.13	21.6149	15.9424	21.5399	-0.447618	-1.11296	1.36379	2.16289	1.56262	2.28974	0.210765	0.285463	0.121685	0.164812	0.00221061
	23.3021	28.8994	7.55926	15.7429	21.3401			-0.834771	-1.38772	1.78357	2.61664
	23.2081	28.9184	7.25384	15.9542	21.6646			-0.623407	-1.06328	1.54051	2.08968
zc103 +/+	23.6694	29.7155	7.46384	16.2056	22.2516	16.3478	22.1516	-0.142169	0.100086	1.10356	0.932977	1.00625	1.00534	0.133924	0.129874	0.0773209	0.0749827
	23.5302	29.2121	7.26881	16.2614	21.9433			-0.0863485	-0.208241	1.06168	1.15528
	23.7149	29.3983	7.1386	16.5763	22.2597			0.228517	0.108155	0.853512	0.927774
zc103 +/-	22.9254	28.7847	7.08769	15.8377	21.697	15.8847	21.7292	-0.510048	-0.454532	1.4241	1.37034	1.37891	1.34032	0.0431357	0.0259947	0.0249044	0.015008	0.0118698
	22.9407	28.7581	7.01316	15.9275	21.7449			-0.420263	-0.406655	1.33817	1.32561
	22.8614	28.718	6.97247	15.8889	21.7455			-0.458854	-0.40602	1.37445	1.32503
zc103 -/-	22.6392	28.9966	7.61978	15.0194	21.3768	15.316	21.3865	-1.32833	-0.774718	2.51112	1.71086	2.09153	1.70653	0.51935	0.190744	0.299847	0.110126	0.0300771
	22.5139	28.5672	7.33787	15.176	21.2293			-1.17171	-0.922256	2.25279	1.89508
	23.0037	28.8046	7.25113	15.7526	21.5535			-0.595196	-0.598044	1.51068	1.51366
					primer set 1 - spliced	primer set 2 - not spliced	spliced STDEV	not spliced STDEV
				zc102 +/+	1.00429	1.00692	0.112148	0.140409
				zc102 +/-	0.635664	0.992364	0.0276149	0.0908799
				zc102 -/-	1.56262	2.28974	0.210765	0.285463
				zc103 +/+	1.00625	1.00534	0.133924	0.129874
				zc103 +/-	1.37891	1.34032	0.0431357	0.0259947
				zc103 -/-	2.09153	1.70653	0.51935	0.190744
