# Supplementary material for: Vanishing white matter disease expression of truncated EIF2B5 activates induced stress response
Source: eLife. 2020 Dec 10;9:e56319. doi: 10.7554/eLife.56319 (PMC7752137; doi:10.7554/eLife.56319)
Supplement: Figure 8—source data 2. [file elife-56319-fig8-data2.xlsx]

## Sheet: Sheet1
eif2b2 fish wt, het, mut; exon 12F + intron 12R; normalized to GAPDH
	no splicing	control	no splicing	no splicing	no splicing	no splicing	no splicing	no splicing	no splicing	TTEST
	exon12F+intron12R	GAPDH	exon12F+intron12R	exon12F+intron12R	ddCt	exon12F+intron12R	exon12F+intron12R	exon12F+intron12R	exon12F+intron12R
	CT	CT	dCT	average	normalized	fold change	average	STDEV	SEM
2b2 +/+	31.2265	18.9785	12.248	12.3007	-0.0527237	1.03722	1.00053	0.0396995	0.0229205
	31.1326	18.8405	12.2921		-0.00859867	1.00598
	31.2621	18.9001	12.362		0.0613223	0.958385
2b2 +/-	30.5831	18.8779	11.7052	12.3489	-0.595507	1.511	1.02263	0.431513	0.249134	0.933837
	31.18	18.6685	12.5115		0.210831	0.864039
	31.1851	18.3551	12.8301		0.52936	0.692862
2b2 -/-		19.4132	19.2657	10.903			2.63485	0.033244	0.0191934	2.05121e-05
	30.1559	18.9821	10.8902		-1.41053	2.65835
	30.1816	19.4019	10.9159		-1.38479	2.61134
	average	STDEV
2b2 +/+	1.00053	0.0396995
2b2 +/-	1.02263	0.431513
2b2 -/-	2.63485	0.033244
