# Supplementary material for: Vanishing white matter disease expression of truncated EIF2B5 activates induced stress response
Source: eLife. 2020 Dec 10;9:e56319. doi: 10.7554/eLife.56319 (PMC7752137; doi:10.7554/eLife.56319)
Supplement: Figure 8—source data 3. [file elife-56319-fig8-data3.xlsx]

## Sheet: Sheet1
human exon 12F + intron 12R; normalized to exon 12F+R
	no splicing	spliced
	exon12F+intron12R	exon 12F+R			ddCt
	CT	CT	dCT	dCT average	normalized	fold change	average	STDEV	SEM	TTEST
(parent)	29.8177	27.1857	2.63202	2.60811	0.0239027	0.983568	1.00053	0.0401628	0.023188
	29.5756	26.926	2.64963		0.0415197	0.971631
	29.7451	27.2024	2.54269		-0.0654223	1.04639
(patient)	28.7906	26.3217	2.46894	2.51494	-0.139179	1.10128	1.06828	0.0700801	0.0404608	0.219912
	28.958	26.3321	2.62583		0.0177137	0.987797
	29.1018	26.6517	2.45006		-0.158049	1.11578
	average	STDEV
(parent)	1.00053	0.0401628
(patient)	1.06828	0.0700801
