# Supplementary material for: Vanishing white matter disease expression of truncated EIF2B5 activates induced stress response
Source: eLife. 2020 Dec 10;9:e56319. doi: 10.7554/eLife.56319 (PMC7752137; doi:10.7554/eLife.56319)
Supplement: Figure 8—source data 4. [file elife-56319-fig8-data4.xlsx]

## Sheet: Analysis
			Independent Variable	Independent Variable	Distance moved	Velocity	Movement	Movement							Distance moved	Velocity	Movement	Movement	Distance moved	Velocity	Movement	Movement
			Independent Variable	Independent Variable	center-point	center-point	Moving / center-point	Not Moving / center-point							center-point	center-point	Moving / center-point	Not Moving / center-point	center-point	center-point	Moving / center-point	Not Moving / center-point
			Treatment	genotype	Total	Mean	Cumulative Duration	Cumulative Duration							Total	Mean	Cumulative Duration	Cumulative Duration	Total	Mean	Cumulative Duration	Cumulative Duration
					mm	mm/s	s	s							mm	mm/s	s	s	mm	mm/s	s	s
Result 1	Trial 1	14	green		843.579	2.81456	194.36	105.64							average				STDEV
Result 1	Trial 1	15	green		439.733	1.46714	95.52	204.48															TTEST green vs blue
Result 1	Trial 1	16	green		455.054	1.51826	107.56	192.44					clutch 1	green	298.331	0.995366	66.0519	233.948	274.354	0.915367	67.2304	67.2304	0.874273
Result 1	Trial 1	17	green		334.571	1.11628	65.96	234.04						blue	289.154	0.964747	65.4852	234.515	214.853	0.716846	53.4221	53.4221
Result 1	Trial 1	18	green		2.29016	0.00764099	0	300					clutch 2	uninjected	556.899	1.85732	134.798	165.202	136.679	0.455841	34.8946	34.8946
Result 1	Trial 1	19	green		2.60324	0.00868557	0	300						green	458.621	1.52955	108.235	191.765	106.776	0.356111	29.107	29.107	0.408747
Result 1	Trial 1	20	green		444.036	1.4815	94	206						blue	429.65	1.43293	98.8291	201.171	143.974	0.480171	37.561	37.561
Result 1	Trial 1	21	green		255.768	0.853357	62.12	237.88					clutch 3	uninjected	403.615	1.3461	90.5709	209.429	124.74	0.416023	37.7942	37.7942
Result 1	Trial 1	22	green		25.9318	0.0865201	3.12	296.88						blue	406.584	1.356	94.1433	205.857	91.4872	0.30512	27.924	27.924
Result 1	Trial 1	23	green		3.47219	0.0115848	0.52	299.48
Result 1	Trial 1	26	green		5.68554	0.0189695	0	300					all clutches	uninjected	519.43	1.73235	123.987	176.013	148.275	0.494513	40.0915	40.0915
Result 1	Trial 1	27	green		367.617	1.22653	79.88	220.12						green	373.762	1.24675	85.9027	214.097	225.641	0.752698	56.5001	56.5001
Result 1	Trial 1	28	green		281.133	0.937984	46.8	253.2						blue	361.53	1.20591	82.8458	217.154	181.927	0.606826	46.1099	46.1099
Result 1	Trial 1	29	green		976.343	3.25752	230.72	69.28
Result 1	Trial 1	30	green		99.7621	0.332851	5.44	294.56					"Green" is wt construct
Result 1	Trial 1	31	green		285.178	0.951481	62.28	237.72					"Blue" is 65KDa truncated eif2b5 construct
Result 1	Trial 1	32	green		171.305	0.571552	24.6	275.4
Result 1	Trial 1	33	green		624.057	2.08213	162.08	137.92
Result 1	Trial 1	34	green		517.56	1.72681	110.12	189.88
Result 1	Trial 1	35	green		89.8913	0.299917	14.16	285.84					normalized data
Result 1	Trial 1	36	green		144.029	0.480544	15.24	284.76
Result 1	Trial 1	37	green		641.643	2.14081	156.44	143.56								Total	Mean	Cumulative Duration	Cumulative Duration	Total	Mean	Cumulative Duration	Cumulative Duration
Result 1	Trial 1	38	green		452.989	1.51137	112.76	187.24								mm	mm/s	s	s	mm	mm/s	s	s
Result 1	Trial 1	39	green		9.1458	0.0305145	0.72	299.28								average				STDEV
Result 1	Trial 1	40	green		528.952	1.76482	131.96	168.04
Result 1	Trial 1	41	green		40.3791	0.134723	6.52	293.48						clutch 1	wt	1	0.995366	66.0519	233.948	274.354	0.915367	67.2304	67.2304
Result 1	Trial 1	42	green		12.2388	0.0408341	0.52	299.48							blue	0.969	0.964747	65.4852	234.515	214.853	0.716846	53.4221	53.4221
Result 1	Trial 1	43	blue		158.236	0.527946	25.4	274.6						clutch 2
Result 1	Trial 1	44	blue		500.102	1.66856	116.6	183.4							wt	458.621	1.52955	108.235	191.765	106.776	0.356111	29.107	29.107
Result 1	Trial 1	45	blue		452.601	1.51008	107.68	192.32							blue	429.65	1.43293	98.8291	201.171	143.974	0.480171	37.561	37.561
Result 1	Trial 1	46	blue		221.427	0.738779	45.08	254.92
Result 1	Trial 1	47	blue		482.694	1.61048	103.8	196.2
Result 1	Trial 1	48	blue		190.1	0.634259	26.96	273.04
Result 1	Trial 1	49	blue		387.556	1.29306	83.64	216.36
Result 1	Trial 1	50	blue		429.182	1.43194	95.08	204.92
Result 1	Trial 1	51	blue		341.36	1.13893	68.44	231.56
Result 1	Trial 1	52	blue		410.805	1.37063	99.92	200.08
Result 1	Trial 1	53	blue		536.643	1.79048	126.4	173.6
Result 1	Trial 1	54	blue		445.107	1.48508	103.68	196.32
Result 1	Trial 1	55	blue		427.475	1.42625	107.92	192.08
Result 1	Trial 1	56	blue		74.7623	0.249441	11.64	288.36
Result 1	Trial 1	57	blue		350.989	1.17106	79.64	220.36
Result 1	Trial 1	59	blue		584.077	1.94874	130.64	169.36
Result 1	Trial 1	61	blue		117.473	0.391944	17.04	282.96
Result 1	Trial 1	62	blue		531.088	1.77195	130.24	169.76
Result 1	Trial 1	63	blue		410.214	1.36866	89.64	210.36
Result 1	Trial 1	64	blue		89.7021	0.299286	20.36	279.64
Result 1	Trial 1	65	blue		592.421	1.97658	162.6	137.4
Result 1	Trial 1	66	blue		11.7545	0.0392184	0	300
Result 1	Trial 1	67	blue		0.628763	0.00209783	0	300
Result 1	Trial 1	68	blue		57.6669	0.192403	11.92	288.08
Result 1	Trial 1	69	blue		14.9757	0.0499657	1.12	298.88
Result 1	Trial 1	70	blue		773.164	2.57962	197.28	102.72
Result 1	Trial 1	71	blue		7.3212	0.0244268	0	300
Result 1	Trial 1	72	blue		173.345	0.578356	27.96	272.04
Result 1	Trial 1	73	blue		454.548	1.51657	104.32	195.68
Result 1	Trial 1	74	blue		249.68	0.833045	54.88	245.12
Result 1	Trial 1	75	blue		351.107	1.17145	72.76	227.24
Result 1	Trial 1	76	blue		6.6374	0.0221453	0	300
Result 1	Trial 1	77	blue		276.076	0.921112	57.76	242.24
Result 1	Trial 1	78	blue		3.83633	0.0127997	1.08	298.92
Result 1	Trial 1	79	blue		457.026	1.52484	110.56	189.44
Result 1	Trial 1	80	blue		484.326	1.61593	121.68	178.32
Result 1	Trial 1	81	blue		387.195	1.29186	92.12	207.88
Result 1	Trial 1	82	blue		6.90582	0.0230409	0	300
Result 1	Trial 1	83	blue		233.114	0.777773	54.6	245.4
Result 1	Trial 1	85	blue		27.4475	0.091577	1.8	298.2
Result 1	Trial 1	86	blue		447.963	1.4946	105.36	194.64
Result 1	Trial 1	87	blue		474.66	1.58368	106.28	193.72
Result 1	Trial 1	88	blue		22.2225	0.0741443	3.24	296.76
Result 1	Trial 1	89	blue		2.51705	0.008398	0	300
Result 1	Trial 1	90	blue		605.951	2.02172	135.2	164.8
Result 1	Trial 1	91	blue		36.9992	0.123446	0	300
Result 1	Trial 2	1	uninjected		586.811	1.95708	160	140
Result 1	Trial 2	2	uninjected		565.742	1.88681	142.6	157.4
Result 1	Trial 2	3	uninjected		630.401	2.10246	149.32	150.68
Result 1	Trial 2	4	uninjected		466.667	1.55639	107.8	192.2
Result 1	Trial 2	5	uninjected		649.438	2.16595	153.8	146.2
Result 1	Trial 2	6	uninjected		541.359	1.80549	135.28	164.72
Result 1	Trial 2	7	uninjected		463.308	1.54518	119.6	180.4
Result 1	Trial 2	8	uninjected		466.593	1.55614	116.4	183.6
Result 1	Trial 2	9	uninjected		661.976	2.20776	174.52	125.48
Result 1	Trial 2	10	uninjected		602.889	2.0107	141.44	158.56
Result 1	Trial 2	11	uninjected		422.529	1.40918	96.72	203.28
Result 1	Trial 2	12	uninjected		721.777	2.40721	185.04	114.96
Result 1	Trial 2	13	uninjected		455.048	1.51764	108.4	191.6
Result 1	Trial 2	14	uninjected		634.795	2.11711	152.92	147.08
Result 1	Trial 2	15	uninjected		582.782	1.94364	140	160
Result 1	Trial 2	16	uninjected		532.204	1.77496	120.04	179.96
Result 1	Trial 2	17	uninjected		133.316	0.444624	10.04	289.96
Result 1	Trial 2	18	uninjected		678.635	2.26332	175.52	124.48
Result 1	Trial 2	19	uninjected		582.039	1.94116	142.56	157.44
Result 1	Trial 2	20	uninjected		807.251	2.69227	171.52	128.48
Result 1	Trial 2	21	uninjected		534.295	1.78193	137.52	162.48
Result 1	Trial 2	22	uninjected		527.076	1.75786	131.28	168.72
Result 1	Trial 2	23	uninjected		754.214	2.51539	188.12	111.88
Result 1	Trial 2	24	uninjected		498.006	1.6609	118.68	181.32
Result 1	Trial 2	25	uninjected		484.065	1.61441	122.96	177.04
Result 1	Trial 2	26	uninjected		529.211	1.76498	135.48	164.52
Result 1	Trial 2	27	uninjected		510.11	1.70127	121.88	178.12
Result 1	Trial 2	28	uninjected		679.862	2.26741	149.28	150.72
Result 1	Trial 2	29	uninjected		825.153	2.75198	188.6	111.4
Result 1	Trial 2	30	uninjected		485.391	1.61883	125	175
Result 1	Trial 2	31	uninjected		322.344	1.07505	79.84	220.16
Result 1	Trial 2	32	uninjected		560.561	1.86953	134.48	165.52
Result 1	Trial 2	33	uninjected		377.105	1.25769	90.08	209.92
Result 1	Trial 2	34	uninjected		661.613	2.20655	156.4	143.6
Result 1	Trial 2	35	green		462.565	1.54271	109.76	190.24
Result 1	Trial 2	36	green		603.55	2.01291	153.36	146.64
Result 1	Trial 2	37	green		474.612	1.58288	110.2	189.8
Result 1	Trial 2	38	green		639.973	2.13438	166.88	133.12
Result 1	Trial 2	39	green		386.489	1.28898	85.92	214.08
Result 1	Trial 2	40	green		531.002	1.77095	121	179
Result 1	Trial 2	41	green		436.38	1.45538	98.84	201.16
Result 1	Trial 2	42	green		382.935	1.27713	84.76	215.24
Result 1	Trial 2	43	green		469.885	1.56712	123.76	176.24
Result 1	Trial 2	44	green		166.784	0.556242	34.2	265.8
Result 1	Trial 2	45	green		604.305	2.01542	153.08	146.92
Result 1	Trial 2	46	green		486.033	1.62097	112.2	187.8
Result 1	Trial 2	47	green		452.84	1.51027	99.92	200.08
Result 1	Trial 2	48	green		503.463	1.67911	120.44	179.56
Result 1	Trial 2	49	green		604.765	2.01696	141.84	158.16
Result 1	Trial 2	50	green		407.441	1.35886	92.32	207.68
Result 1	Trial 2	51	green		400.867	1.33694	95.64	204.36
Result 1	Trial 2	53	green		479.408	1.59888	126.64	173.36
Result 1	Trial 2	54	green		386.977	1.29061	88.64	211.36
Result 1	Trial 2	55	green		441.743	1.47326	99.04	200.96
Result 1	Trial 2	56	green		394.819	1.31676	86.44	213.56
Result 1	Trial 2	57	green		372.997	1.24399	84	216
Result 1	Trial 2	58	green		595.498	1.98605	129.84	170.16
Result 1	Trial 2	59	green		321.574	1.07248	78.92	221.08
Result 1	Trial 2	62	blue		497.999	1.66088	122.32	177.68
Result 1	Trial 2	63	blue		341.161	1.13781	85.8	214.2
Result 1	Trial 2	64	blue		744.883	2.48427	162	138
Result 1	Trial 2	65	blue		315.934	1.05367	63	237
Result 1	Trial 2	66	blue		331.034	1.10404	76.04	223.96
Result 1	Trial 2	67	blue		399.172	1.33128	88.04	211.96
Result 1	Trial 2	68	blue		296.631	0.989296	63.48	236.52
Result 1	Trial 2	69	blue		385.076	1.28427	87.16	212.84
Result 1	Trial 2	70	blue		168.756	0.562819	33.92	266.08
Result 1	Trial 2	72	blue		374.764	1.24988	86.72	213.28
Result 1	Trial 2	73	blue		427.259	1.42496	93.8	206.2
Result 1	Trial 2	74	blue		383.862	1.28022	89.12	210.88
Result 1	Trial 2	75	blue		539.241	1.79843	124.84	175.16
Result 1	Trial 2	76	blue		199.401	0.665024	40.04	259.96
Result 1	Trial 2	77	blue		377.564	1.25922	88.8	211.2
Result 1	Trial 2	78	blue		499.272	1.66513	117.16	182.84
Result 1	Trial 2	79	blue		359.915	1.20036	76.88	223.12
Result 1	Trial 2	80	blue		340.353	1.13512	72.12	227.88
Result 1	Trial 2	81	blue		504.283	1.68184	127.72	172.28
Result 1	Trial 2	82	blue		237.08	0.790688	47.92	252.08
Result 1	Trial 2	83	blue		351.969	1.17385	73.44	226.56
Result 1	Trial 2	84	blue		503.664	1.67978	115.56	184.44
Result 1	Trial 2	85	blue		303.685	1.01282	60.72	239.28
Result 1	Trial 2	86	blue		649.469	2.16605	168.36	131.64
Result 1	Trial 2	87	blue		609.813	2.03379	154.36	145.64
Result 1	Trial 2	88	blue		542.415	1.80902	114.32	185.68
Result 1	Trial 2	89	blue		339.684	1.13288	73.92	226.08
Result 1	Trial 2	90	blue		445.437	1.48558	102.28	197.72
Result 1	Trial 2	91	blue		424.431	1.41553	97.8	202.2
Result 1	Trial 2	92	blue		836.209	2.78885	202.32	97.68
Result 1	Trial 2	93	blue		443.05	1.47762	98.2	201.8
Result 1	Trial 2	94	blue		530.704	1.76996	130.92	169.08
Result 1	Trial 2	95	blue		474.295	1.58183	122.28	177.72
Result 1	Trial 3	1	uninjected		611.89	2.04072	152	148
Result 1	Trial 3	2	uninjected		622.553	2.07628	158.4	141.6
Result 1	Trial 3	3	uninjected		420.145	1.40123	93.52	206.48
Result 1	Trial 3	4	uninjected		284.183	0.947781	59.08	240.92
Result 1	Trial 3	5	uninjected		419.547	1.39924	101.48	198.52
Result 1	Trial 3	6	uninjected		237.003	0.790431	41.36	258.64
Result 1	Trial 3	7	uninjected		355.791	1.1866	74.64	225.36
Result 1	Trial 3	8	uninjected		394.748	1.31653	83.32	216.68
Result 1	Trial 3	9	uninjected		421.531	1.40585	93.16	206.84
Result 1	Trial 3	10	uninjected		265.621	0.885876	45.36	254.64
Result 1	Trial 3	11	uninjected		406.75	1.35656	93.96	206.04
Result 1	Trial 3	12	blue		361.806	1.20666	62.44	237.56
Result 1	Trial 3	13	blue		361.782	1.20658	74.92	225.08
Result 1	Trial 3	14	blue		571.819	1.90708	150.24	149.76
Result 1	Trial 3	15	blue		496.719	1.65661	118.96	181.04
Result 1	Trial 3	16	blue		319.42	1.0653	76.56	223.44
Result 1	Trial 3	17	blue		418.841	1.39688	98.32	201.68
Result 1	Trial 3	18	blue		343.525	1.14569	75.16	224.84
Result 1	Trial 3	19	blue		456.677	1.52307	113.88	186.12
Result 1	Trial 3	20	blue		365.175	1.2179	85.32	214.68
Result 1	Trial 3	21	blue		391.876	1.30695	92.08	207.92
Result 1	Trial 3	22	blue		392.086	1.30765	92.76	207.24
Result 1	Trial 3	23	blue		409.426	1.36548	94.72	205.28
Result 1	Trial 3	24	blue		492.502	1.64255	118.8	181.2
Result 1	Trial 3	25	blue		400.983	1.33732	97.56	202.44
Result 1	Trial 3	26	blue		404.987	1.35068	93.12	206.88
Result 1	Trial 3	28	blue		394.594	1.31601	89.88	210.12
Result 1	Trial 3	29	blue		333.604	1.11261	72.8	227.2
Result 1	Trial 3	30	blue		257.549	0.858953	52.56	247.44
Result 1	Trial 3	31	blue		214.981	0.716985	37.84	262.16
Result 1	Trial 3	32	blue		584.685	1.94999	136.8	163.2
Result 1	Trial 3	33	blue		317.816	1.05995	62.92	237.08
Result 1	Trial 3	34	blue		457.049	1.52431	105.12	194.88
Result 1	Trial 3	35	blue		545.91	1.82067	142.28	157.72
Result 1	Trial 3	36	blue		464.193	1.54814	114.4	185.6

## Sheet: Analysis (2)
			Independent Variable	Independent Variable	Distance moved	Velocity	Movement	Movement
			Independent Variable	Independent Variable	center-point	center-point	Moving / center-point	Not Moving / center-point
			Treatment	genotype	Total	Mean	Cumulative Duration	Cumulative Duration
					mm	mm/s	s	s
Result 1	Trial 1	43	blue		158.236	0.527946	25.4	274.6
Result 1	Trial 1	44	blue		500.102	1.66856	116.6	183.4
Result 1	Trial 1	45	blue		452.601	1.51008	107.68	192.32
Result 1	Trial 1	46	blue		221.427	0.738779	45.08	254.92
Result 1	Trial 1	47	blue		482.694	1.61048	103.8	196.2
Result 1	Trial 1	48	blue		190.1	0.634259	26.96	273.04
Result 1	Trial 1	49	blue		387.556	1.29306	83.64	216.36
Result 1	Trial 1	50	blue		429.182	1.43194	95.08	204.92
Result 1	Trial 1	51	blue		341.36	1.13893	68.44	231.56
Result 1	Trial 1	52	blue		410.805	1.37063	99.92	200.08
Result 1	Trial 1	53	blue		536.643	1.79048	126.4	173.6
Result 1	Trial 1	54	blue		445.107	1.48508	103.68	196.32
Result 1	Trial 1	55	blue		427.475	1.42625	107.92	192.08
Result 1	Trial 1	56	blue		74.7623	0.249441	11.64	288.36
Result 1	Trial 1	57	blue		350.989	1.17106	79.64	220.36
Result 1	Trial 1	59	blue		584.077	1.94874	130.64	169.36
Result 1	Trial 1	61	blue		117.473	0.391944	17.04	282.96
Result 1	Trial 1	62	blue		531.088	1.77195	130.24	169.76
Result 1	Trial 1	63	blue		410.214	1.36866	89.64	210.36
Result 1	Trial 1	64	blue		89.7021	0.299286	20.36	279.64
Result 1	Trial 1	65	blue		592.421	1.97658	162.6	137.4
Result 1	Trial 1	68	blue		57.6669	0.192403	11.92	288.08
Result 1	Trial 1	69	blue		14.9757	0.0499657	1.12	298.88
Result 1	Trial 1	70	blue		773.164	2.57962	197.28	102.72
Result 1	Trial 1	72	blue		173.345	0.578356	27.96	272.04
Result 1	Trial 1	73	blue		454.548	1.51657	104.32	195.68
Result 1	Trial 1	74	blue		249.68	0.833045	54.88	245.12
Result 1	Trial 1	75	blue		351.107	1.17145	72.76	227.24
Result 1	Trial 1	77	blue		276.076	0.921112	57.76	242.24
Result 1	Trial 1	78	blue		3.83633	0.0127997	1.08	298.92
Result 1	Trial 1	79	blue		457.026	1.52484	110.56	189.44
Result 1	Trial 1	80	blue		484.326	1.61593	121.68	178.32
Result 1	Trial 1	81	blue		387.195	1.29186	92.12	207.88
Result 1	Trial 1	83	blue		233.114	0.777773	54.6	245.4
Result 1	Trial 1	86	blue		447.963	1.4946	105.36	194.64
Result 1	Trial 1	87	blue		474.66	1.58368	106.28	193.72
Result 1	Trial 1	88	blue		22.2225	0.0741443	3.24	296.76
Result 1	Trial 1	90	blue		605.951	2.02172	135.2	164.8
Result 1	Trial 2	1	uninjected		586.811	1.95708	160	140
Result 1	Trial 2	2	uninjected		565.742	1.88681	142.6	157.4
Result 1	Trial 2	3	uninjected		630.401	2.10246	149.32	150.68
Result 1	Trial 2	4	uninjected		466.667	1.55639	107.8	192.2
Result 1	Trial 2	5	uninjected		649.438	2.16595	153.8	146.2
Result 1	Trial 2	6	uninjected		541.359	1.80549	135.28	164.72
Result 1	Trial 2	7	uninjected		463.308	1.54518	119.6	180.4
Result 1	Trial 2	8	uninjected		466.593	1.55614	116.4	183.6
Result 1	Trial 2	9	uninjected		661.976	2.20776	174.52	125.48
Result 1	Trial 2	10	uninjected		602.889	2.0107	141.44	158.56
Result 1	Trial 2	11	uninjected		422.529	1.40918	96.72	203.28
Result 1	Trial 2	12	uninjected		721.777	2.40721	185.04	114.96
Result 1	Trial 2	13	uninjected		455.048	1.51764	108.4	191.6
Result 1	Trial 2	14	uninjected		634.795	2.11711	152.92	147.08
Result 1	Trial 2	15	uninjected		582.782	1.94364	140	160
Result 1	Trial 2	16	uninjected		532.204	1.77496	120.04	179.96
Result 1	Trial 2	17	uninjected		133.316	0.444624	10.04	289.96
Result 1	Trial 2	18	uninjected		678.635	2.26332	175.52	124.48
Result 1	Trial 2	19	uninjected		582.039	1.94116	142.56	157.44
Result 1	Trial 2	20	uninjected		807.251	2.69227	171.52	128.48
Result 1	Trial 2	21	uninjected		534.295	1.78193	137.52	162.48
Result 1	Trial 2	22	uninjected		527.076	1.75786	131.28	168.72
Result 1	Trial 2	23	uninjected		754.214	2.51539	188.12	111.88
Result 1	Trial 2	24	uninjected		498.006	1.6609	118.68	181.32
Result 1	Trial 2	25	uninjected		484.065	1.61441	122.96	177.04
Result 1	Trial 2	26	uninjected		529.211	1.76498	135.48	164.52
Result 1	Trial 2	27	uninjected		510.11	1.70127	121.88	178.12
Result 1	Trial 2	28	uninjected		679.862	2.26741	149.28	150.72
Result 1	Trial 2	29	uninjected		825.153	2.75198	188.6	111.4
Result 1	Trial 2	30	uninjected		485.391	1.61883	125	175
Result 1	Trial 2	31	uninjected		322.344	1.07505	79.84	220.16
Result 1	Trial 2	32	uninjected		560.561	1.86953	134.48	165.52
Result 1	Trial 2	33	uninjected		377.105	1.25769	90.08	209.92
Result 1	Trial 2	34	uninjected		661.613	2.20655	156.4	143.6
Result 1	Trial 2	62	blue		497.999	1.66088	122.32	177.68
Result 1	Trial 2	63	blue		341.161	1.13781	85.8	214.2
Result 1	Trial 2	64	blue		744.883	2.48427	162	138
Result 1	Trial 2	65	blue		315.934	1.05367	63	237
Result 1	Trial 2	66	blue		331.034	1.10404	76.04	223.96
Result 1	Trial 2	67	blue		399.172	1.33128	88.04	211.96
Result 1	Trial 2	68	blue		296.631	0.989296	63.48	236.52
Result 1	Trial 2	69	blue		385.076	1.28427	87.16	212.84
Result 1	Trial 2	70	blue		168.756	0.562819	33.92	266.08
Result 1	Trial 2	72	blue		374.764	1.24988	86.72	213.28
Result 1	Trial 2	73	blue		427.259	1.42496	93.8	206.2
Result 1	Trial 2	74	blue		383.862	1.28022	89.12	210.88
Result 1	Trial 2	75	blue		539.241	1.79843	124.84	175.16
Result 1	Trial 2	76	blue		199.401	0.665024	40.04	259.96
Result 1	Trial 2	77	blue		377.564	1.25922	88.8	211.2
Result 1	Trial 2	78	blue		499.272	1.66513	117.16	182.84
Result 1	Trial 2	79	blue		359.915	1.20036	76.88	223.12
Result 1	Trial 2	80	blue		340.353	1.13512	72.12	227.88
Result 1	Trial 2	81	blue		504.283	1.68184	127.72	172.28
Result 1	Trial 2	82	blue		237.08	0.790688	47.92	252.08
Result 1	Trial 2	83	blue		351.969	1.17385	73.44	226.56
Result 1	Trial 2	84	blue		503.664	1.67978	115.56	184.44
Result 1	Trial 2	85	blue		303.685	1.01282	60.72	239.28
Result 1	Trial 2	86	blue		649.469	2.16605	168.36	131.64
Result 1	Trial 2	87	blue		609.813	2.03379	154.36	145.64
Result 1	Trial 2	88	blue		542.415	1.80902	114.32	185.68
Result 1	Trial 2	89	blue		339.684	1.13288	73.92	226.08
Result 1	Trial 2	90	blue		445.437	1.48558	102.28	197.72
Result 1	Trial 2	91	blue		424.431	1.41553	97.8	202.2
Result 1	Trial 2	92	blue		836.209	2.78885	202.32	97.68
Result 1	Trial 2	93	blue		443.05	1.47762	98.2	201.8
Result 1	Trial 2	94	blue		530.704	1.76996	130.92	169.08
Result 1	Trial 2	95	blue		474.295	1.58183	122.28	177.72
Result 1	Trial 3	1	uninjected		611.89	2.04072	152	148
Result 1	Trial 3	2	uninjected		622.553	2.07628	158.4	141.6
Result 1	Trial 3	3	uninjected		420.145	1.40123	93.52	206.48
Result 1	Trial 3	4	uninjected		284.183	0.947781	59.08	240.92
Result 1	Trial 3	5	uninjected		419.547	1.39924	101.48	198.52
Result 1	Trial 3	6	uninjected		237.003	0.790431	41.36	258.64
Result 1	Trial 3	7	uninjected		355.791	1.1866	74.64	225.36
Result 1	Trial 3	8	uninjected		394.748	1.31653	83.32	216.68
Result 1	Trial 3	9	uninjected		421.531	1.40585	93.16	206.84
Result 1	Trial 3	10	uninjected		265.621	0.885876	45.36	254.64
Result 1	Trial 3	11	uninjected		406.75	1.35656	93.96	206.04
Result 1	Trial 3	12	blue		361.806	1.20666	62.44	237.56
Result 1	Trial 3	13	blue		361.782	1.20658	74.92	225.08
Result 1	Trial 3	14	blue		571.819	1.90708	150.24	149.76
Result 1	Trial 3	15	blue		496.719	1.65661	118.96	181.04
Result 1	Trial 3	16	blue		319.42	1.0653	76.56	223.44
Result 1	Trial 3	17	blue		418.841	1.39688	98.32	201.68
Result 1	Trial 3	18	blue		343.525	1.14569	75.16	224.84
Result 1	Trial 3	19	blue		456.677	1.52307	113.88	186.12
Result 1	Trial 3	20	blue		365.175	1.2179	85.32	214.68
Result 1	Trial 3	21	blue		391.876	1.30695	92.08	207.92
Result 1	Trial 3	22	blue		392.086	1.30765	92.76	207.24
Result 1	Trial 3	23	blue		409.426	1.36548	94.72	205.28
Result 1	Trial 3	24	blue		492.502	1.64255	118.8	181.2
Result 1	Trial 3	25	blue		400.983	1.33732	97.56	202.44
Result 1	Trial 3	26	blue		404.987	1.35068	93.12	206.88
Result 1	Trial 3	28	blue		394.594	1.31601	89.88	210.12
Result 1	Trial 3	29	blue		333.604	1.11261	72.8	227.2
Result 1	Trial 3	30	blue		257.549	0.858953	52.56	247.44
Result 1	Trial 3	31	blue		214.981	0.716985	37.84	262.16
Result 1	Trial 3	32	blue		584.685	1.94999	136.8	163.2
Result 1	Trial 3	33	blue		317.816	1.05995	62.92	237.08
Result 1	Trial 3	34	blue		457.049	1.52431	105.12	194.88
Result 1	Trial 3	35	blue		545.91	1.82067	142.28	157.72
Result 1	Trial 3	36	blue		464.193	1.54814	114.4	185.6
