# Supplementary material for: Vanishing white matter disease expression of truncated EIF2B5 activates induced stress response
Source: eLife. 2020 Dec 10;9:e56319. doi: 10.7554/eLife.56319 (PMC7752137; doi:10.7554/eLife.56319)
Supplement: Figure 8—source data 5. [file elife-56319-fig8-data5.xlsx]

## Sheet: atf4
	Cт
	target gene	internal control (28s)			ΔCт			ΔCт mean	ΔΔCт			ΔΔCт mean	RQ			RQ mean	SE	Realtime機器算的RQ mean
eif2b2+/+	21.5604	11.2973		Sample 1	10.2631	10.8771	10.8203	10.7541	-0.490989	0.123016	0.0662697	5.92119e-16	1.40541	0.918266	0.955104	1.02115	0.229079	1
eif2b2+/+	21.6517	10.6833			10.3544	10.9684	10.9116		-0.399695	0.21431	0.157564		1.31923	0.861959	0.896538
eif2b2+/+	21.7708	10.7401			10.4735	11.0875	11.0308		-0.280579	0.333426	0.27668		1.21468	0.79365	0.825489
eif2b2sa17223/+	21.7772	10.4151		Sample 2	11.3621	11.1446	10.8064	11.1419	0.608051	0.39048	0.0523007	0.387842	0.656083	0.762876	0.964397	0.774288	0.133851	0.764272
eif2b2sa17223/+	21.8017	10.6326			11.3866	11.1691	10.8309		0.632574	0.415003	0.0768237		0.645025	0.750018	0.948143
eif2b2sa17223/+	21.8654	10.9708			11.4503	11.2327	10.8945		0.696224	0.478653	0.140474		0.617186	0.717648	0.907221
eif2b2sa17223/sa17223	20.7405	11.0017		Sample 3	9.73872	9.75435	10.136	10.0148	-1.01535	-0.999723	-0.618076	-0.739225	2.02139	1.99962	1.53483	1.68644	0.250723	1.66928
eif2b2sa17223/sa17223	20.9644	10.9861			9.96262	9.97825	10.3599		-0.79145	-0.775823	-0.394176		1.73081	1.71217	1.31419
eif2b2sa17223/sa17223	20.932	10.6045			9.9303	9.94593	10.3276		-0.823774	-0.808147	-0.4265		1.77003	1.75096	1.34397
Sample 4				Sample 4	0	0	0	0	-10.7541	-10.7541	-10.7541	-10.7541	1727.03	1727.03	1727.03	1727.03	0	1727.03
Sample 4					0	0	0		-10.7541	-10.7541	-10.7541		1727.03	1727.03	1727.03
Sample 4					0	0	0		-10.7541	-10.7541	-10.7541		1727.03	1727.03	1727.03
Sample 5				Sample 5	0	0	0	0	-10.7541	-10.7541	-10.7541	-10.7541	1727.03	1727.03	1727.03	1727.03	0	1727.03
Sample 5					0	0	0		-10.7541	-10.7541	-10.7541		1727.03	1727.03	1727.03
Sample 5					0	0	0		-10.7541	-10.7541	-10.7541		1727.03	1727.03	1727.03
Sample 6				Sample 6	0	0	0	0	-10.7541	-10.7541	-10.7541	-10.7541	1727.03	1727.03	1727.03	1727.03	0	1727.03
Sample 6					0	0	0		-10.7541	-10.7541	-10.7541		1727.03	1727.03	1727.03
Sample 6					0	0	0		-10.7541	-10.7541	-10.7541		1727.03	1727.03	1727.03
Sample 7				Sample 7	0	0	0	0	-10.7541	-10.7541	-10.7541	-10.7541	1727.03	1727.03	1727.03	1727.03	0	1727.03
Sample 7					0	0	0		-10.7541	-10.7541	-10.7541		1727.03	1727.03	1727.03
Sample 7					0	0	0		-10.7541	-10.7541	-10.7541		1727.03	1727.03	1727.03
Sample 8				Sample 8	0	0	0	0	-10.7541	-10.7541	-10.7541	-10.7541	1727.03	1727.03	1727.03	1727.03	0	1727.03
Sample 8					0	0	0		-10.7541	-10.7541	-10.7541		1727.03	1727.03	1727.03
Sample 8					0	0	0		-10.7541	-10.7541	-10.7541		1727.03	1727.03	1727.03
Sample 9				Sample 9	0	0	0	0	-10.7541	-10.7541	-10.7541	-10.7541	1727.03	1727.03	1727.03	1727.03	0	1727.03
Sample 9					0	0	0		-10.7541	-10.7541	-10.7541		1727.03	1727.03	1727.03
Sample 9					0	0	0		-10.7541	-10.7541	-10.7541		1727.03	1727.03	1727.03
	Value	SD	t-test
eif2b2+/+	1	0.229079
eif2b2sa17223/+	0.764272	0.133851	0.00769196
eif2b2sa17223/sa17223	1.66928	0.250723	1.20896e-05
Sample 4	1727.03	0	8.21795e-33
Sample 5	1727.03	0	8.21795e-33
Sample 6	1727.03	0	8.21795e-33
Sample 7	1727.03	0	8.21795e-33
Sample 8	1727.03	0	8.21795e-33
Sample 9	1727.03	0	8.21795e-33

## Sheet: bip
eif2b5+/+	Cт
eif2b5zc103/+	target gene	internal control (28s)			ΔCт			ΔCт mean	ΔΔCт			ΔΔCт mean	RQ			RQ mean	SE	Realtime機器算的RQ mean
eif2b5zc103/zc103	22.808	11.2973		Sample 1	11.5106	12.1246	12.0679	11.9242	-0.413582	0.200423	0.143677	1.18424e-15	1.33199	0.870295	0.905209	1.02161	0.231485	1
eif2b2+/+	22.7258	10.6833			11.4285	12.0425	11.9857		-0.495739	0.118266	0.06152		1.41004	0.921294	0.958254
eif2b2+/+	22.9596	10.7401			11.6623	12.2763	12.2195		-0.261943	0.352062	0.295316		1.19909	0.783464	0.814894
eif2b2sa17223/+	22.5281	10.4151		Sample 2	12.113	11.8954	11.5573	11.8098	0.188825	-0.028746	-0.366925	-0.114406	0.87732	1.02013	1.2896	1.09715	0.192642	1.08253
eif2b2sa17223/+	22.4057	10.6326			11.9906	11.773	11.4348		0.066402	-0.151169	-0.489348		0.955017	1.11047	1.40381
eif2b2sa17223/+	22.5141	10.9708			12.0991	11.8815	11.5433		0.174875	-0.042696	-0.380875		0.885844	1.03004	1.30213
eif2b2sa17223/sa17223	21.3584	11.0017		Sample 3	10.3566	10.3723	10.7539	10.5572	-1.56757	-1.55194	-1.17029	-1.36701	2.96404	2.93211	2.25057	2.60595	0.385003	2.57936
eif2b2sa17223/sa17223	21.3418	10.9861			10.34	10.3557	10.7373		-1.58415	-1.56853	-1.18688		2.99832	2.96602	2.2766
eif2b2sa17223/sa17223	21.5637	10.6045			10.562	10.5776	10.9592		-1.36222	-1.34659	-0.964947		2.57081	2.54311	1.95199
Sample 4				Sample 4	0	0	0	0	-11.9242	-11.9242	-11.9242	-11.9242	3886.34	3886.34	3886.34	3886.34	0	3886.34
Sample 4					0	0	0		-11.9242	-11.9242	-11.9242		3886.34	3886.34	3886.34
Sample 4					0	0	0		-11.9242	-11.9242	-11.9242		3886.34	3886.34	3886.34
Sample 5				Sample 5	0	0	0	0	-11.9242	-11.9242	-11.9242	-11.9242	3886.34	3886.34	3886.34	3886.34	0	3886.34
Sample 5					0	0	0		-11.9242	-11.9242	-11.9242		3886.34	3886.34	3886.34
Sample 5					0	0	0		-11.9242	-11.9242	-11.9242		3886.34	3886.34	3886.34
Sample 6				Sample 6	0	0	0	0	-11.9242	-11.9242	-11.9242	-11.9242	3886.34	3886.34	3886.34	3886.34	0	3886.34
Sample 6					0	0	0		-11.9242	-11.9242	-11.9242		3886.34	3886.34	3886.34
Sample 6					0	0	0		-11.9242	-11.9242	-11.9242		3886.34	3886.34	3886.34
Sample 7				Sample 7	0	0	0	0	-11.9242	-11.9242	-11.9242	-11.9242	3886.34	3886.34	3886.34	3886.34	0	3886.34
Sample 7					0	0	0		-11.9242	-11.9242	-11.9242		3886.34	3886.34	3886.34
Sample 7					0	0	0		-11.9242	-11.9242	-11.9242		3886.34	3886.34	3886.34
Sample 8				Sample 8	0	0	0	0	-11.9242	-11.9242	-11.9242	-11.9242	3886.34	3886.34	3886.34	3886.34	0	3886.34
Sample 8					0	0	0		-11.9242	-11.9242	-11.9242		3886.34	3886.34	3886.34
Sample 8					0	0	0		-11.9242	-11.9242	-11.9242		3886.34	3886.34	3886.34
Sample 9				Sample 9	0	0	0	0	-11.9242	-11.9242	-11.9242	-11.9242	3886.34	3886.34	3886.34	3886.34	0	3886.34
Sample 9					0	0	0		-11.9242	-11.9242	-11.9242		3886.34	3886.34	3886.34
Sample 9					0	0	0		-11.9242	-11.9242	-11.9242		3886.34	3886.34	3886.34
	Value	SD	t-test
eif2b2+/+	1	0.231485
eif2b2sa17223/+	1.08253	0.192642	0.231531
eif2b2sa17223/sa17223	2.57936	0.385003	4.28875e-08
Sample 4	3886.34	0	1.35517e-35
Sample 5	3886.34	0	1.35517e-35
Sample 6	3886.34	0	1.35517e-35
Sample 7	3886.34	0	1.35517e-35
Sample 8	3886.34	0	1.35517e-35
Sample 9	3886.34	0	1.35517e-35

## Sheet: chopII
eif2b5+/+	Cт
eif2b5zc103/+	target gene	internal control (28s)			ΔCт			ΔCт mean	ΔΔCт			ΔΔCт mean	RQ			RQ mean	SE	Realtime機器算的RQ mean
eif2b5zc103/zc103	24.1042	11.2973		Sample 1	12.8069	13.4209	13.3642	13.2471	-0.440176	0.173829	0.117083	-1.77636e-15	1.35677	0.886487	0.92205	1.02088	0.227477	1
eif2b2+/+	24.0909	10.6833			12.7936	13.4076	13.3509		-0.453476	0.160529	0.103783		1.36934	0.894697	0.93059
eif2b2+/+	24.2668	10.7401			12.9695	13.5835	13.5267		-0.277611	0.336394	0.279648		1.21219	0.792019	0.823792
eif2b2sa17223/+	24.1777	10.4151		Sample 2	13.7626	13.5451	13.2069	13.5805	0.515554	0.297983	-0.0401963	0.333467	0.699524	0.813389	1.02825	0.805725	0.149788	0.793627
eif2b2sa17223/+	24.397	10.6326			13.982	13.7644	13.4262		0.734883	0.517312	0.179133		0.600867	0.698673	0.883234
eif2b2sa17223/+	24.1854	10.9708			13.7704	13.5528	13.2146		0.523285	0.305714	-0.0324653		0.695786	0.809042	1.02276
eif2b2sa17223/sa17223	22.3588	11.0017		Sample 3	11.357	11.3726	11.7543	11.8933	-1.89006	-1.87443	-1.49278	-1.35376	3.7065	3.66657	2.81432	2.62776	0.671963	2.55578
eif2b2sa17223/sa17223	22.9361	10.9861			11.9344	11.95	12.3317		-1.3127	-1.29707	-0.915423		2.48406	2.45729	1.88612
eif2b2sa17223/sa17223	22.9774	10.6045			11.9756	11.9913	12.3729		-1.27143	-1.2558	-0.874156		2.41401	2.388	1.83294
Sample 4				Sample 4	0	0	0	0	-13.2471	-13.2471	-13.2471	-13.2471	9722.26	9722.26	9722.26	9722.26	1.92933e-12	9722.26
Sample 4					0	0	0		-13.2471	-13.2471	-13.2471		9722.26	9722.26	9722.26
Sample 4					0	0	0		-13.2471	-13.2471	-13.2471		9722.26	9722.26	9722.26
Sample 5				Sample 5	0	0	0	0	-13.2471	-13.2471	-13.2471	-13.2471	9722.26	9722.26	9722.26	9722.26	1.92933e-12	9722.26
Sample 5					0	0	0		-13.2471	-13.2471	-13.2471		9722.26	9722.26	9722.26
Sample 5					0	0	0		-13.2471	-13.2471	-13.2471		9722.26	9722.26	9722.26
Sample 6				Sample 6	0	0	0	0	-13.2471	-13.2471	-13.2471	-13.2471	9722.26	9722.26	9722.26	9722.26	1.92933e-12	9722.26
Sample 6					0	0	0		-13.2471	-13.2471	-13.2471		9722.26	9722.26	9722.26
Sample 6					0	0	0		-13.2471	-13.2471	-13.2471		9722.26	9722.26	9722.26
Sample 7				Sample 7	0	0	0	0	-13.2471	-13.2471	-13.2471	-13.2471	9722.26	9722.26	9722.26	9722.26	1.92933e-12	9722.26
Sample 7					0	0	0		-13.2471	-13.2471	-13.2471		9722.26	9722.26	9722.26
Sample 7					0	0	0		-13.2471	-13.2471	-13.2471		9722.26	9722.26	9722.26
Sample 8				Sample 8	0	0	0	0	-13.2471	-13.2471	-13.2471	-13.2471	9722.26	9722.26	9722.26	9722.26	1.92933e-12	9722.26
Sample 8					0	0	0		-13.2471	-13.2471	-13.2471		9722.26	9722.26	9722.26
Sample 8					0	0	0		-13.2471	-13.2471	-13.2471		9722.26	9722.26	9722.26
Sample 9				Sample 9	0	0	0	0	-13.2471	-13.2471	-13.2471	-13.2471	9722.26	9722.26	9722.26	9722.26	1.92933e-12	9722.26
Sample 9					0	0	0		-13.2471	-13.2471	-13.2471		9722.26	9722.26	9722.26
Sample 9					0	0	0		-13.2471	-13.2471	-13.2471		9722.26	9722.26	9722.26
	Value	SD	t-test
eif2b2+/+	1	0.227477
eif2b2sa17223/+	0.793627	0.149788	0.0164435
eif2b2sa17223/sa17223	2.55578	0.671963	2.61963e-05
Sample 4	9722.26	1.92933e-12	7.67266e-39
Sample 5	9722.26	1.92933e-12	7.67266e-39
Sample 6	9722.26	1.92933e-12	7.67266e-39
Sample 7	9722.26	1.92933e-12	7.67266e-39
Sample 8	9722.26	1.92933e-12	7.67266e-39
Sample 9	9722.26	1.92933e-12	7.67266e-39

## Sheet: perk
eif2b5+/+	Cт
eif2b5zc103/+	target gene	internal control (28s)			ΔCт			ΔCт mean	ΔΔCт			ΔΔCт mean	RQ			RQ mean	SE	Realtime機器算的RQ mean
eif2b5zc103/zc103	25.7593	11.2973		Sample 1	14.4619	15.0759	15.0192	14.9061	-0.444153	0.169852	0.113106	-5.92119e-16	1.36052	0.888934	0.924595	1.02076	0.226811	1
eif2b2+/+	25.9214	10.6833			14.624	15.2381	15.1813		-0.282046	0.331959	0.275213		1.21592	0.794457	0.826328
eif2b2+/+	25.7584	10.7401			14.461	15.075	15.0183		-0.445065	0.16894	0.112194		1.36138	0.889496	0.92518
eif2b2sa17223/+	25.4095	10.4151		Sample 2	14.9944	14.7769	14.4387	14.8558	0.088332	-0.129239	-0.467418	-0.0502657	0.94061	1.09372	1.38263	1.05051	0.191539	1.03546
eif2b2sa17223/+	25.5801	10.6326			15.165	14.9474	14.6093		0.258923	0.041352	-0.296827		0.835712	0.971744	1.22844
eif2b2sa17223/+	25.5964	10.9708			15.1814	14.9638	14.6256		0.275269	0.057698	-0.280481		0.826296	0.960796	1.2146
eif2b2sa17223/sa17223	25.7721	11.0017		Sample 3	14.7703	14.786	15.1676	14.9223	-0.135762	-0.120135	0.261512	0.0161747	1.09867	1.08684	0.834213	0.996744	0.128985	0.988851
eif2b2sa17223/sa17223	25.7718	10.9861			14.77	14.7857	15.1673		-0.136058	-0.120431	0.261216		1.0989	1.08706	0.834384
eif2b2sa17223/sa17223	25.8153	10.6045			14.8135	14.8292	15.2108		-0.092557	-0.07693	0.304717		1.06626	1.05477	0.809601
Sample 4				Sample 4	0	0	0	0	-14.9061	-14.9061	-14.9061	-14.9061	30703	30703	30703	30703	3.85866e-12	30703
Sample 4					0	0	0		-14.9061	-14.9061	-14.9061		30703	30703	30703
Sample 4					0	0	0		-14.9061	-14.9061	-14.9061		30703	30703	30703
Sample 5				Sample 5	0	0	0	0	-14.9061	-14.9061	-14.9061	-14.9061	30703	30703	30703	30703	3.85866e-12	30703
Sample 5					0	0	0		-14.9061	-14.9061	-14.9061		30703	30703	30703
Sample 5					0	0	0		-14.9061	-14.9061	-14.9061		30703	30703	30703
Sample 6				Sample 6	0	0	0	0	-14.9061	-14.9061	-14.9061	-14.9061	30703	30703	30703	30703	3.85866e-12	30703
Sample 6					0	0	0		-14.9061	-14.9061	-14.9061		30703	30703	30703
Sample 6					0	0	0		-14.9061	-14.9061	-14.9061		30703	30703	30703
Sample 7				Sample 7	0	0	0	0	-14.9061	-14.9061	-14.9061	-14.9061	30703	30703	30703	30703	3.85866e-12	30703
Sample 7					0	0	0		-14.9061	-14.9061	-14.9061		30703	30703	30703
Sample 7					0	0	0		-14.9061	-14.9061	-14.9061		30703	30703	30703
Sample 8				Sample 8	0	0	0	0	-14.9061	-14.9061	-14.9061	-14.9061	30703	30703	30703	30703	3.85866e-12	30703
Sample 8					0	0	0		-14.9061	-14.9061	-14.9061		30703	30703	30703
Sample 8					0	0	0		-14.9061	-14.9061	-14.9061		30703	30703	30703
Sample 9				Sample 9	0	0	0	0	-14.9061	-14.9061	-14.9061	-14.9061	30703	30703	30703	30703	3.85866e-12	30703
Sample 9					0	0	0		-14.9061	-14.9061	-14.9061		30703	30703	30703
Sample 9					0	0	0		-14.9061	-14.9061	-14.9061		30703	30703	30703
	Value	SD	t-test
eif2b2+/+	1	0.226811
eif2b2sa17223/+	1.03546	0.191539	0.383836
eif2b2sa17223/sa17223	0.988851	0.128985	0.393468
Sample 4	30703	3.85866e-12	7.57197e-43
Sample 5	30703	3.85866e-12	7.57197e-43
Sample 6	30703	3.85866e-12	7.57197e-43
Sample 7	30703	3.85866e-12	7.57197e-43
Sample 8	30703	3.85866e-12	7.57197e-43
Sample 9	30703	3.85866e-12	7.57197e-43

## Sheet: atf4 (2)
	Cт
	target gene	internal control (28s)			ΔCт			ΔCт mean	ΔΔCт			ΔΔCт mean	RQ			RQ mean	SE	Realtime機器算的RQ mean
eif2b5+/+	20.4396	9.99877		Sample 1	10.4408	10.6254	10.8636	10.5715	-0.130713	0.0538868	0.292086	0	1.09483	0.963337	0.81672	1.00834	0.137164	1
eif2b5+/+	20.39	9.81417			10.3912	10.5758	10.814		-0.180304	0.00429583	0.242495		1.13312	0.997027	0.845282
eif2b5+/+	20.2739	9.57597			10.2751	10.4597	10.6979		-0.296382	-0.111782	0.126417		1.22806	1.08056	0.916104
eif2b5zc103/+	19.9371	9.37566		Sample 2	10.5615	10.2673	10.1354	10.2804	-0.0100442	-0.304256	-0.436105	-0.291136	1.00699	1.23478	1.35295	1.23352	0.163391	1.2236
eif2b5zc103/+	19.9253	9.66987			10.5496	10.2554	10.1235		-0.0219282	-0.31614	-0.447989		1.01532	1.245	1.36414
eif2b5zc103/+	19.826	9.80172			10.4504	10.1562	10.0243		-0.121162	-0.415374	-0.547223		1.08761	1.33364	1.46127
eif2b5zc103/zc103	19.9083	10.1432		Sample 3	9.76511	9.91944	10.1475	9.93044	-0.806416	-0.652082	-0.424029	-0.641083	1.74886	1.57143	1.34167	1.56898	0.181491	1.5595
eif2b5zc103/zc103	19.9203	9.98889			9.77706	9.9314	10.1594		-0.794465	-0.640131	-0.412078		1.73443	1.55847	1.3306
eif2b5zc103/zc103	19.8557	9.76084			9.71244	9.86677	10.0948		-0.859088	-0.704754	-0.476701		1.81389	1.62987	1.39156
Sample 4				Sample 4	0	0	0	0	-10.5715	-10.5715	-10.5715	-10.5715	1521.76	1521.76	1521.76	1521.76	2.41166e-13	1521.76
Sample 4					0	0	0		-10.5715	-10.5715	-10.5715		1521.76	1521.76	1521.76
Sample 4					0	0	0		-10.5715	-10.5715	-10.5715		1521.76	1521.76	1521.76
Sample 5				Sample 5	0	0	0	0	-10.5715	-10.5715	-10.5715	-10.5715	1521.76	1521.76	1521.76	1521.76	2.41166e-13	1521.76
Sample 5					0	0	0		-10.5715	-10.5715	-10.5715		1521.76	1521.76	1521.76
Sample 5					0	0	0		-10.5715	-10.5715	-10.5715		1521.76	1521.76	1521.76
Sample 6				Sample 6	0	0	0	0	-10.5715	-10.5715	-10.5715	-10.5715	1521.76	1521.76	1521.76	1521.76	2.41166e-13	1521.76
Sample 6					0	0	0		-10.5715	-10.5715	-10.5715		1521.76	1521.76	1521.76
Sample 6					0	0	0		-10.5715	-10.5715	-10.5715		1521.76	1521.76	1521.76
Sample 7				Sample 7	0	0	0	0	-10.5715	-10.5715	-10.5715	-10.5715	1521.76	1521.76	1521.76	1521.76	2.41166e-13	1521.76
Sample 7					0	0	0		-10.5715	-10.5715	-10.5715		1521.76	1521.76	1521.76
Sample 7					0	0	0		-10.5715	-10.5715	-10.5715		1521.76	1521.76	1521.76
Sample 8				Sample 8	0	0	0	0	-10.5715	-10.5715	-10.5715	-10.5715	1521.76	1521.76	1521.76	1521.76	2.41166e-13	1521.76
Sample 8					0	0	0		-10.5715	-10.5715	-10.5715		1521.76	1521.76	1521.76
Sample 8					0	0	0		-10.5715	-10.5715	-10.5715		1521.76	1521.76	1521.76
Sample 9				Sample 9	0	0	0	0	-10.5715	-10.5715	-10.5715	-10.5715	1521.76	1521.76	1521.76	1521.76	2.41166e-13	1521.76
Sample 9					0	0	0		-10.5715	-10.5715	-10.5715		1521.76	1521.76	1521.76
Sample 9					0	0	0		-10.5715	-10.5715	-10.5715		1521.76	1521.76	1521.76
	Value	SD	t-test
eif2b5+/+	1	0.137164
eif2b5zc103/+	1.2236	0.163391	0.0030811
eif2b5zc103/zc103	1.5595	0.181491	1.17183e-06
Sample 4	1521.76	2.41166e-13	3.7383e-34
Sample 5	1521.76	2.41166e-13	3.7383e-34
Sample 6	1521.76	2.41166e-13	3.7383e-34
Sample 7	1521.76	2.41166e-13	3.7383e-34
Sample 8	1521.76	2.41166e-13	3.7383e-34
Sample 9	1521.76	2.41166e-13	3.7383e-34

## Sheet: bip (2)
	Cт
	target gene	internal control (28s)			ΔCт			ΔCт mean	ΔΔCт			ΔΔCт mean	RQ			RQ mean	SE	Realtime機器算的RQ mean
eif2b5+/+	21.9965	9.99877		Sample 1	11.9977	12.1823	12.4205	12.2397	-0.242055	-0.0574545	0.180745	-5.92119e-16	1.18268	1.04063	0.882247	1.00738	0.128581	1
eif2b5+/+	22.0676	9.81417			12.0689	12.2535	12.4916		-0.170894	0.0137065	0.251906		1.12576	0.990544	0.839786
eif2b5+/+	22.0441	9.57597			12.0453	12.2299	12.4681		-0.194452	-0.0098515	0.228348		1.14429	1.00685	0.853612
eif2b5zc103/+	21.7092	9.37566		Sample 2	12.3335	12.0393	11.9074	12.0286	0.0937625	-0.20045	-0.332299	-0.21113	0.937076	1.14906	1.25902	1.16701	0.154784	1.15759
eif2b5zc103/+	21.6403	9.66987			12.2646	11.9704	11.8386		0.0248935	-0.269319	-0.401168		0.982893	1.20524	1.32058
eif2b5zc103/+	21.5836	9.80172			12.208	11.9138	11.7819		-0.0317735	-0.325986	-0.457835		1.02227	1.25352	1.37348
eif2b5zc103/zc103	21.8503	10.1432		Sample 3	11.7071	11.8614	12.0895	11.9358	-0.532637	-0.378303	-0.150251	-0.303957	1.44657	1.29981	1.10976	1.24247	0.147884	1.23453
eif2b5zc103/zc103	21.9643	9.98889			11.8211	11.9754	12.2035		-0.418676	-0.264342	-0.0362885		1.3367	1.20109	1.02547
eif2b5zc103/zc103	21.8857	9.76084			11.7425	11.8968	12.1249		-0.497279	-0.342944	-0.114892		1.41155	1.26834	1.08289
Sample 4				Sample 4	0	0	0	0	-12.2397	-12.2397	-12.2397	-12.2397	4836.49	4836.49	4836.49	4836.49	9.64665e-13	4836.49
Sample 4					0	0	0		-12.2397	-12.2397	-12.2397		4836.49	4836.49	4836.49
Sample 4					0	0	0		-12.2397	-12.2397	-12.2397		4836.49	4836.49	4836.49
Sample 5				Sample 5	0	0	0	0	-12.2397	-12.2397	-12.2397	-12.2397	4836.49	4836.49	4836.49	4836.49	9.64665e-13	4836.49
Sample 5					0	0	0		-12.2397	-12.2397	-12.2397		4836.49	4836.49	4836.49
Sample 5					0	0	0		-12.2397	-12.2397	-12.2397		4836.49	4836.49	4836.49
Sample 6				Sample 6	0	0	0	0	-12.2397	-12.2397	-12.2397	-12.2397	4836.49	4836.49	4836.49	4836.49	9.64665e-13	4836.49
Sample 6					0	0	0		-12.2397	-12.2397	-12.2397		4836.49	4836.49	4836.49
Sample 6					0	0	0		-12.2397	-12.2397	-12.2397		4836.49	4836.49	4836.49
Sample 7				Sample 7	0	0	0	0	-12.2397	-12.2397	-12.2397	-12.2397	4836.49	4836.49	4836.49	4836.49	9.64665e-13	4836.49
Sample 7					0	0	0		-12.2397	-12.2397	-12.2397		4836.49	4836.49	4836.49
Sample 7					0	0	0		-12.2397	-12.2397	-12.2397		4836.49	4836.49	4836.49
Sample 8				Sample 8	0	0	0	0	-12.2397	-12.2397	-12.2397	-12.2397	4836.49	4836.49	4836.49	4836.49	9.64665e-13	4836.49
Sample 8					0	0	0		-12.2397	-12.2397	-12.2397		4836.49	4836.49	4836.49
Sample 8					0	0	0		-12.2397	-12.2397	-12.2397		4836.49	4836.49	4836.49
Sample 9				Sample 9	0	0	0	0	-12.2397	-12.2397	-12.2397	-12.2397	4836.49	4836.49	4836.49	4836.49	9.64665e-13	4836.49
Sample 9					0	0	0		-12.2397	-12.2397	-12.2397		4836.49	4836.49	4836.49
Sample 9					0	0	0		-12.2397	-12.2397	-12.2397		4836.49	4836.49	4836.49
	Value	SD	t-test
eif2b5+/+	1	0.128581
eif2b5zc103/+	1.15759	0.154784	0.015278
eif2b5zc103/zc103	1.23453	0.147884	0.00123462
Sample 4	4836.49	9.64665e-13	2.13365e-38
Sample 5	4836.49	9.64665e-13	2.13365e-38
Sample 6	4836.49	9.64665e-13	2.13365e-38
Sample 7	4836.49	9.64665e-13	2.13365e-38
Sample 8	4836.49	9.64665e-13	2.13365e-38
Sample 9	4836.49	9.64665e-13	2.13365e-38

## Sheet: chopII (2)
	Cт
	target gene	internal control (28s)			ΔCт			ΔCт mean	ΔΔCт			ΔΔCт mean	RQ			RQ mean	SE	Realtime機器算的RQ mean
eif2b5+/+	23.383	9.99877		Sample 1	13.3843	13.5689	13.8071	13.6279	-0.243597	-0.0589975	0.179202	0	1.18394	1.04174	0.883191	1.00769	0.131299	1
eif2b5+/+	23.4	9.81417			13.4012	13.5858	13.824		-0.226626	-0.0420265	0.196173		1.1701	1.02956	0.872863
eif2b5+/+	23.4895	9.57597			13.4907	13.6753	13.9135		-0.137176	0.0474245	0.285624		1.09975	0.967662	0.820387
eif2b5zc103/+	22.8424	9.37566		Sample 2	13.4667	13.1725	13.0406	13.2506	-0.161161	-0.455373	-0.587222	-0.377234	1.11819	1.37114	1.50235	1.30889	0.169007	1.29885
eif2b5zc103/+	22.8466	9.66987			13.4709	13.1767	13.0449		-0.156907	-0.451119	-0.582968		1.11489	1.3671	1.49793
eif2b5zc103/+	22.9102	9.80172			13.5345	13.2403	13.1084		-0.0933625	-0.387575	-0.519424		1.06685	1.30819	1.43338
eif2b5zc103/zc103	22.9448	10.1432		Sample 3	12.8016	12.9559	13.184	12.9119	-0.82625	-0.671916	-0.443863	-0.715986	1.77307	1.59319	1.36024	1.6532	0.197049	1.64261
eif2b5zc103/zc103	22.8382	9.98889			12.695	12.8493	13.0773		-0.932897	-0.778562	-0.55051		1.90911	1.71542	1.4646
eif2b5zc103/zc103	22.8455	9.76084			12.7023	12.8567	13.0847		-0.925531	-0.771197	-0.543145		1.89938	1.70669	1.45715
Sample 4				Sample 4	0	0	0	0	-13.6279	-13.6279	-13.6279	-13.6279	12658.8	12658.8	12658.8	12658.8	0	12658.8
Sample 4					0	0	0		-13.6279	-13.6279	-13.6279		12658.8	12658.8	12658.8
Sample 4					0	0	0		-13.6279	-13.6279	-13.6279		12658.8	12658.8	12658.8
Sample 5				Sample 5	0	0	0	0	-13.6279	-13.6279	-13.6279	-13.6279	12658.8	12658.8	12658.8	12658.8	0	12658.8
Sample 5					0	0	0		-13.6279	-13.6279	-13.6279		12658.8	12658.8	12658.8
Sample 5					0	0	0		-13.6279	-13.6279	-13.6279		12658.8	12658.8	12658.8
Sample 6				Sample 6	0	0	0	0	-13.6279	-13.6279	-13.6279	-13.6279	12658.8	12658.8	12658.8	12658.8	0	12658.8
Sample 6					0	0	0		-13.6279	-13.6279	-13.6279		12658.8	12658.8	12658.8
Sample 6					0	0	0		-13.6279	-13.6279	-13.6279		12658.8	12658.8	12658.8
Sample 7				Sample 7	0	0	0	0	-13.6279	-13.6279	-13.6279	-13.6279	12658.8	12658.8	12658.8	12658.8	0	12658.8
Sample 7					0	0	0		-13.6279	-13.6279	-13.6279		12658.8	12658.8	12658.8
Sample 7					0	0	0		-13.6279	-13.6279	-13.6279		12658.8	12658.8	12658.8
Sample 8				Sample 8	0	0	0	0	-13.6279	-13.6279	-13.6279	-13.6279	12658.8	12658.8	12658.8	12658.8	0	12658.8
Sample 8					0	0	0		-13.6279	-13.6279	-13.6279		12658.8	12658.8	12658.8
Sample 8					0	0	0		-13.6279	-13.6279	-13.6279		12658.8	12658.8	12658.8
Sample 9				Sample 9	0	0	0	0	-13.6279	-13.6279	-13.6279	-13.6279	12658.8	12658.8	12658.8	12658.8	0	12658.8
Sample 9					0	0	0		-13.6279	-13.6279	-13.6279		12658.8	12658.8	12658.8
Sample 9					0	0	0		-13.6279	-13.6279	-13.6279		12658.8	12658.8	12658.8
	Value	SD	t-test
eif2b5+/+	1	0.131299
eif2b5zc103/+	1.29885	0.169007	0.000365601
eif2b5zc103/zc103	1.64261	0.197049	5.46611e-07
Sample 4	12658.8	0	1.14405e-41
Sample 5	12658.8	0	1.14405e-41
Sample 6	12658.8	0	1.14405e-41
Sample 7	12658.8	0	1.14405e-41
Sample 8	12658.8	0	1.14405e-41
Sample 9	12658.8	0	1.14405e-41

## Sheet: perk (2)
	Cт
	target gene	internal control (28s)			ΔCт			ΔCт mean	ΔΔCт			ΔΔCт mean	RQ			RQ mean	SE	Realtime機器算的RQ mean
eif2b5+/+	24.2449	9.99877		Sample 1	14.2461	14.4307	14.6689	14.5937	-0.347651	-0.163051	0.0751487	-1.18424e-15	1.27249	1.11965	0.949244	1.01003	0.151172	1
eif2b5+/+	24.4209	9.81417			14.4221	14.6067	14.8449		-0.171618	0.0129822	0.251182		1.12632	0.991042	0.840208
eif2b5+/+	24.5044	9.57597			14.5056	14.6902	14.9284		-0.0881308	0.0964692	0.334669		1.06299	0.935319	0.792966
eif2b5zc103/+	24.1316	9.37566		Sample 2	14.7559	14.4617	14.3298	14.5753	0.162179	-0.132033	-0.263882	-0.0184048	0.893674	1.09584	1.20071	1.02088	0.133713	1.01284
eif2b5zc103/+	24.2151	9.66987			14.8394	14.5452	14.4133		0.24567	-0.0485418	-0.180391		0.843424	1.03422	1.13319
eif2b5zc103/+	24.2266	9.80172			14.8509	14.5567	14.4249		0.257209	-0.0370028	-0.168852		0.836705	1.02598	1.12416
eif2b5zc103/zc103	25.1524	10.1432		Sample 3	15.0092	15.1636	15.3916	15.1304	0.415493	0.569827	0.79788	0.53663	0.749763	0.673697	0.575194	0.693904	0.083532	0.689379
eif2b5zc103/zc103	25.1069	9.98889			14.9637	15.118	15.3461		0.369961	0.524295	0.752348		0.773803	0.695299	0.593637
eif2b5zc103/zc103	25.0247	9.76084			14.8814	15.0358	15.2638		0.287716	0.44205	0.670103		0.819198	0.736088	0.628462
Sample 4				Sample 4	0	0	0	0	-14.5937	-14.5937	-14.5937	-14.5937	24725.8	24725.8	24725.8	24725.8	3.85866e-12	24725.8
Sample 4					0	0	0		-14.5937	-14.5937	-14.5937		24725.8	24725.8	24725.8
Sample 4					0	0	0		-14.5937	-14.5937	-14.5937		24725.8	24725.8	24725.8
Sample 5				Sample 5	0	0	0	0	-14.5937	-14.5937	-14.5937	-14.5937	24725.8	24725.8	24725.8	24725.8	3.85866e-12	24725.8
Sample 5					0	0	0		-14.5937	-14.5937	-14.5937		24725.8	24725.8	24725.8
Sample 5					0	0	0		-14.5937	-14.5937	-14.5937		24725.8	24725.8	24725.8
Sample 6				Sample 6	0	0	0	0	-14.5937	-14.5937	-14.5937	-14.5937	24725.8	24725.8	24725.8	24725.8	3.85866e-12	24725.8
Sample 6					0	0	0		-14.5937	-14.5937	-14.5937		24725.8	24725.8	24725.8
Sample 6					0	0	0		-14.5937	-14.5937	-14.5937		24725.8	24725.8	24725.8
Sample 7				Sample 7	0	0	0	0	-14.5937	-14.5937	-14.5937	-14.5937	24725.8	24725.8	24725.8	24725.8	3.85866e-12	24725.8
Sample 7					0	0	0		-14.5937	-14.5937	-14.5937		24725.8	24725.8	24725.8
Sample 7					0	0	0		-14.5937	-14.5937	-14.5937		24725.8	24725.8	24725.8
Sample 8				Sample 8	0	0	0	0	-14.5937	-14.5937	-14.5937	-14.5937	24725.8	24725.8	24725.8	24725.8	3.85866e-12	24725.8
Sample 8					0	0	0		-14.5937	-14.5937	-14.5937		24725.8	24725.8	24725.8
Sample 8					0	0	0		-14.5937	-14.5937	-14.5937		24725.8	24725.8	24725.8
Sample 9				Sample 9	0	0	0	0	-14.5937	-14.5937	-14.5937	-14.5937	24725.8	24725.8	24725.8	24725.8	3.85866e-12	24725.8
Sample 9					0	0	0		-14.5937	-14.5937	-14.5937		24725.8	24725.8	24725.8
Sample 9					0	0	0		-14.5937	-14.5937	-14.5937		24725.8	24725.8	24725.8
	Value	SD	t-test
eif2b5+/+	1	0.151172
eif2b5zc103/+	1.01284	0.133713	0.43695
eif2b5zc103/zc103	0.689379	0.083532	6.02499e-05
Sample 4	24725.8	3.85866e-12	1.66692e-43
Sample 5	24725.8	3.85866e-12	1.66692e-43
Sample 6	24725.8	3.85866e-12	1.66692e-43
Sample 7	24725.8	3.85866e-12	1.66692e-43
Sample 8	24725.8	3.85866e-12	1.66692e-43
Sample 9	24725.8	3.85866e-12	1.66692e-43

## Sheet: atf4 (3)
	Cт
	target gene	internal control (28s)			ΔCт			ΔCт mean	ΔΔCт			ΔΔCт mean	RQ			RQ mean	SE	Realtime機器算的RQ mean
eif2b5+/+	20.1056	9.03001		Sample 1	11.0756	11.3266	10.917	11.2767	-0.201106	0.0499417	-0.359662	1.18424e-15	1.14958	0.965975	1.28313	1.01122	0.159577	1
eif2b5+/+	20.4365	8.77896			11.4065	11.6576	11.248		0.129812	0.38086	-0.0287443		0.913951	0.76798	1.02012
eif2b5+/+	20.2855	9.18857			11.2555	11.5065	11.0969		-0.0211973	0.229851	-0.179753		1.0148	0.852723	1.13269
eif2b5zc102/+	20.836	9.74222		Sample 2	11.0938	10.8614	10.6765	10.8553	-0.182881	-0.415316	-0.600197	-0.421398	1.13515	1.33359	1.51592	1.34947	0.175759	1.33922
eif2b5zc102/+	20.7416	9.97465			10.9994	10.767	10.5821		-0.277306	-0.509741	-0.694622		1.21193	1.42379	1.61846
eif2b5zc102/+	20.8647	10.1595			11.1224	10.89	10.7051		-0.154256	-0.386691	-0.571572		1.11285	1.30739	1.48614
eif2b5c102/zc102	19.6169	10.3098		Sample 3	9.30719	9.6483	9.81757	9.58183	-1.96951	-1.62839	-1.45913	-1.69487	3.91635	3.09169	2.74943	3.27332	0.523157	3.23747
eif2b5c102/zc102	19.6085	9.96864			9.2987	9.63981	9.80908		-1.978	-1.63688	-1.46762		3.93946	3.10993	2.76565
eif2b5c102/zc102	19.5979	9.79937			9.28811	9.62922	9.79848		-1.98859	-1.64748	-1.47821		3.9685	3.13286	2.78604
Sample 4				Sample 4	0	0	0	0	-11.2767	-11.2767	-11.2767	-11.2767	2480.99	2480.99	2480.99	2480.99	0	2480.99
Sample 4					0	0	0		-11.2767	-11.2767	-11.2767		2480.99	2480.99	2480.99
Sample 4					0	0	0		-11.2767	-11.2767	-11.2767		2480.99	2480.99	2480.99
Sample 5				Sample 5	0	0	0	0	-11.2767	-11.2767	-11.2767	-11.2767	2480.99	2480.99	2480.99	2480.99	0	2480.99
Sample 5					0	0	0		-11.2767	-11.2767	-11.2767		2480.99	2480.99	2480.99
Sample 5					0	0	0		-11.2767	-11.2767	-11.2767		2480.99	2480.99	2480.99
Sample 6				Sample 6	0	0	0	0	-11.2767	-11.2767	-11.2767	-11.2767	2480.99	2480.99	2480.99	2480.99	0	2480.99
Sample 6					0	0	0		-11.2767	-11.2767	-11.2767		2480.99	2480.99	2480.99
Sample 6					0	0	0		-11.2767	-11.2767	-11.2767		2480.99	2480.99	2480.99
Sample 7				Sample 7	0	0	0	0	-11.2767	-11.2767	-11.2767	-11.2767	2480.99	2480.99	2480.99	2480.99	0	2480.99
Sample 7					0	0	0		-11.2767	-11.2767	-11.2767		2480.99	2480.99	2480.99
Sample 7					0	0	0		-11.2767	-11.2767	-11.2767		2480.99	2480.99	2480.99
Sample 8				Sample 8	0	0	0	0	-11.2767	-11.2767	-11.2767	-11.2767	2480.99	2480.99	2480.99	2480.99	0	2480.99
Sample 8					0	0	0		-11.2767	-11.2767	-11.2767		2480.99	2480.99	2480.99
Sample 8					0	0	0		-11.2767	-11.2767	-11.2767		2480.99	2480.99	2480.99
Sample 9				Sample 9	0	0	0	0	-11.2767	-11.2767	-11.2767	-11.2767	2480.99	2480.99	2480.99	2480.99	0	2480.99
Sample 9					0	0	0		-11.2767	-11.2767	-11.2767		2480.99	2480.99	2480.99
Sample 9					0	0	0		-11.2767	-11.2767	-11.2767		2480.99	2480.99	2480.99
	Value	SD	t-test
eif2b5+/+	1	0.159577
eif2b5zc102/+	1.33922	0.175759	0.000295962
eif2b5zc102/zc102	3.23747	0.523157	1.78841e-07
Sample 4	2480.99	0	2.50844e-35
Sample 5	2480.99	0	2.50844e-35
Sample 6	2480.99	0	2.50844e-35
Sample 7	2480.99	0	2.50844e-35
Sample 8	2480.99	0	2.50844e-35
Sample 9	2480.99	0	2.50844e-35

## Sheet: bip (3)
	Cт
	target gene	internal control (28s)			ΔCт			ΔCт mean	ΔΔCт			ΔΔCт mean	RQ			RQ mean	SE	Realtime機器算的RQ mean
eif2b5+/+	22.1213	9.03001		Sample 1	13.0913	13.3423	12.9327	13.1669	-0.0756227	0.175425	-0.234179	-1.18424e-15	1.05382	0.885506	1.17624	1.00747	0.128903	1
eif2b5+/+	22.1349	8.77896			13.1049	13.356	12.9464		-0.0619537	0.189094	-0.22051		1.04388	0.877156	1.16515
eif2b5+/+	22.242	9.18857			13.212	13.463	13.0534		0.0450843	0.296132	-0.113472		0.969233	0.814433	1.08183
eif2b5zc102/+	22.584	9.74222		Sample 2	12.8418	12.6094	12.4245	12.62	-0.32509	-0.557525	-0.742406	-0.546899	1.25274	1.47174	1.67296	1.47115	0.182821	1.46094
eif2b5zc102/+	22.5829	9.97465			12.8407	12.6083	12.4234		-0.326166	-0.558601	-0.743482		1.25368	1.47284	1.67421
eif2b5zc102/+	22.5694	10.1595			12.8272	12.5948	12.4099		-0.339691	-0.572126	-0.757007		1.26549	1.48671	1.68998
eif2b5c102/zc102	20.9878	10.3098		Sample 3	10.678	11.0191	11.1884	11.0325	-2.48886	-2.14775	-1.97849	-2.13436	5.61336	4.43136	3.94079	4.44326	0.739604	4.39043
eif2b5c102/zc102	21.0458	9.96864			10.7361	11.0772	11.2465		-2.43079	-2.08968	-1.92042		5.3919	4.25654	3.78532
eif2b5c102/zc102	21.1417	9.79937			10.832	11.1731	11.3423		-2.33492	-1.99381	-1.82454		5.04523	3.98286	3.54194
Sample 4				Sample 4	0	0	0	0	-13.1669	-13.1669	-13.1669	-13.1669	9196.63	9196.63	9196.63	9196.63	0	9196.63
Sample 4					0	0	0		-13.1669	-13.1669	-13.1669		9196.63	9196.63	9196.63
Sample 4					0	0	0		-13.1669	-13.1669	-13.1669		9196.63	9196.63	9196.63
Sample 5				Sample 5	0	0	0	0	-13.1669	-13.1669	-13.1669	-13.1669	9196.63	9196.63	9196.63	9196.63	0	9196.63
Sample 5					0	0	0		-13.1669	-13.1669	-13.1669		9196.63	9196.63	9196.63
Sample 5					0	0	0		-13.1669	-13.1669	-13.1669		9196.63	9196.63	9196.63
Sample 6				Sample 6	0	0	0	0	-13.1669	-13.1669	-13.1669	-13.1669	9196.63	9196.63	9196.63	9196.63	0	9196.63
Sample 6					0	0	0		-13.1669	-13.1669	-13.1669		9196.63	9196.63	9196.63
Sample 6					0	0	0		-13.1669	-13.1669	-13.1669		9196.63	9196.63	9196.63
Sample 7				Sample 7	0	0	0	0	-13.1669	-13.1669	-13.1669	-13.1669	9196.63	9196.63	9196.63	9196.63	0	9196.63
Sample 7					0	0	0		-13.1669	-13.1669	-13.1669		9196.63	9196.63	9196.63
Sample 7					0	0	0		-13.1669	-13.1669	-13.1669		9196.63	9196.63	9196.63
Sample 8				Sample 8	0	0	0	0	-13.1669	-13.1669	-13.1669	-13.1669	9196.63	9196.63	9196.63	9196.63	0	9196.63
Sample 8					0	0	0		-13.1669	-13.1669	-13.1669		9196.63	9196.63	9196.63
Sample 8					0	0	0		-13.1669	-13.1669	-13.1669		9196.63	9196.63	9196.63
Sample 9				Sample 9	0	0	0	0	-13.1669	-13.1669	-13.1669	-13.1669	9196.63	9196.63	9196.63	9196.63	0	9196.63
Sample 9					0	0	0		-13.1669	-13.1669	-13.1669		9196.63	9196.63	9196.63
Sample 9					0	0	0		-13.1669	-13.1669	-13.1669		9196.63	9196.63	9196.63
	Value	SD	t-test
eif2b5+/+	1	0.128903
eif2b5zc102/+	1.46094	0.182821	9.95095e-06
eif2b5zc102/zc102	4.39043	0.739604	2.17252e-07
Sample 4	9196.63	0	1.27257e-40
Sample 5	9196.63	0	1.27257e-40
Sample 6	9196.63	0	1.27257e-40
Sample 7	9196.63	0	1.27257e-40
Sample 8	9196.63	0	1.27257e-40
Sample 9	9196.63	0	1.27257e-40

[truncated: 2 more sheets: chopII (3), perk (3)]
