# Supplementary material for: Vanishing white matter disease expression of truncated EIF2B5 activates induced stress response
Source: eLife. 2020 Dec 10;9:e56319. doi: 10.7554/eLife.56319 (PMC7752137; doi:10.7554/eLife.56319)
Supplement: Figure 8—source data 6. [file elife-56319-fig8-data6.xlsx]

## Sheet: atf4
	Cт
	target gene	internal control			ΔCт			ΔCт mean	ΔΔCт			ΔΔCт mean	RQ			RQ mean	SE	Realtime機器算的RQ mean
control	19.9449	18.8413		Sample 1	1.10358	1.05425	1.01367	1.06857	0.0350083	-0.0143217	-0.0549087	0	0.976026	1.00998	1.03879	1.00036	0.0282889	1
control	19.9721	18.8907			1.13076	1.08143	1.04084		0.0621863	0.0128563	-0.0277307		0.957812	0.991128	1.01941
control	19.952	18.9312			1.11063	1.0613	1.02071		0.0420523	-0.00727767	-0.0478647		0.971272	1.00506	1.03373
EIF2B5-FL	19.7289	19.5816		Sample 2	0.14736	0.103193	0.294479	0.379534	-0.921215	-0.965382	-0.774096	-0.689041	1.89371	1.95258	1.71012	1.62259	0.197652	1.61221
EIF2B5-FL	20.0382	19.6257			0.456675	0.412508	0.603794		-0.6119	-0.656067	-0.464781		1.52827	1.57578	1.38011
EIF2B5-FL	20.0132	19.4344			0.431615	0.387448	0.578734		-0.63696	-0.681127	-0.489841		1.55505	1.60339	1.40429
EIF2B5-65kDa	20.1435	19.2941		Sample 3	0.849426	1.12894	0.859146	0.955745	-0.219149	0.0603653	-0.209429	-0.11283	1.16405	0.959021	1.15623	1.08568	0.10067	1.08135
EIF2B5-65kDa	20.1749	19.0145			0.880867	1.16038	0.890587		-0.187708	0.0918063	-0.177988		1.13895	0.938347	1.1313
EIF2B5-65kDa	20.1418	19.2843			0.847708	1.12722	0.857428		-0.220867	0.0586473	-0.211147		1.16543	0.960164	1.15761
				Sample 4	0	0	0	0	-1.06857	-1.06857	-1.06857	-1.06857	2.09736	2.09736	2.09736	2.09736	4.71028e-16	2.09736
					0	0	0		-1.06857	-1.06857	-1.06857		2.09736	2.09736	2.09736
					0	0	0		-1.06857	-1.06857	-1.06857		2.09736	2.09736	2.09736
Sample 5				Sample 5	0	0	0	0	-1.06857	-1.06857	-1.06857	-1.06857	2.09736	2.09736	2.09736	2.09736	4.71028e-16	2.09736
Sample 5					0	0	0		-1.06857	-1.06857	-1.06857		2.09736	2.09736	2.09736
Sample 5					0	0	0		-1.06857	-1.06857	-1.06857		2.09736	2.09736	2.09736
Sample 6				Sample 6	0	0	0	0	-1.06857	-1.06857	-1.06857	-1.06857	2.09736	2.09736	2.09736	2.09736	4.71028e-16	2.09736
Sample 6					0	0	0		-1.06857	-1.06857	-1.06857		2.09736	2.09736	2.09736
Sample 6					0	0	0		-1.06857	-1.06857	-1.06857		2.09736	2.09736	2.09736
Sample 7				Sample 7	0	0	0	0	-1.06857	-1.06857	-1.06857	-1.06857	2.09736	2.09736	2.09736	2.09736	4.71028e-16	2.09736
Sample 7					0	0	0		-1.06857	-1.06857	-1.06857		2.09736	2.09736	2.09736
Sample 7					0	0	0		-1.06857	-1.06857	-1.06857		2.09736	2.09736	2.09736
Sample 8				Sample 8	0	0	0	0	-1.06857	-1.06857	-1.06857	-1.06857	2.09736	2.09736	2.09736	2.09736	4.71028e-16	2.09736
Sample 8					0	0	0		-1.06857	-1.06857	-1.06857		2.09736	2.09736	2.09736
Sample 8					0	0	0		-1.06857	-1.06857	-1.06857		2.09736	2.09736	2.09736
Sample 9				Sample 9	0	0	0	0	-1.06857	-1.06857	-1.06857	-1.06857	2.09736	2.09736	2.09736	2.09736	4.71028e-16	2.09736
Sample 9					0	0	0		-1.06857	-1.06857	-1.06857		2.09736	2.09736	2.09736
Sample 9					0	0	0		-1.06857	-1.06857	-1.06857		2.09736	2.09736	2.09736
	Value	SD	t-test
control	1	0.0282889
EIF2B5-FL	1.61221	0.197652	5.34048e-06
EIF2B5-65kDa	1.08135	0.10067	0.0180966
Sample 4	2.09736	4.71028e-16	1.66556e-14
Sample 5	2.09736	4.71028e-16	1.66556e-14
Sample 6	2.09736	4.71028e-16	1.66556e-14
Sample 7	2.09736	4.71028e-16	1.66556e-14
Sample 8	2.09736	4.71028e-16	1.66556e-14
Sample 9	2.09736	4.71028e-16	1.66556e-14

## Sheet: bip
	Cт
	target gene	internal control			ΔCт			ΔCт mean	ΔΔCт			ΔΔCт mean	RQ			RQ mean	SE	Realtime機器算的RQ mean
control	22.763	18.8413		Sample 1	3.92168	3.87235	3.83176	3.90104	0.0206353	-0.0286947	-0.0692817	-4.44089e-16	0.985798	1.02009	1.04919	1.00057	0.0357182	1
control	22.7694	18.8907			3.9281	3.87877	3.83819		0.0270613	-0.0222687	-0.0628557		0.981417	1.01556	1.04453
control	22.8339	18.9312			3.99259	3.94326	3.90268		0.0915503	0.0422203	0.00163333		0.938514	0.971159	0.998869
EIF2B5-FL	23.3064	19.5816		Sample 2	3.7249	3.68073	3.87202	3.79762	-0.176146	-0.220313	-0.0290267	-0.103427	1.12986	1.16499	1.02032	1.07623	0.0674054	1.07432
EIF2B5-FL	23.3718	19.6257			3.79027	3.7461	3.93739		-0.110775	-0.154942	0.0363443		1.07981	1.11338	0.975123
EIF2B5-FL	23.3563	19.4344			3.77473	3.73056	3.92185		-0.126312	-0.170479	0.0208073		1.0915	1.12543	0.985681
EIF2B5-65kDa	23.2252	19.2941		Sample 3	3.93115	4.21066	3.94087	4.03967	0.0301063	0.30962	0.0398263	0.138624	0.979348	0.806854	0.972772	0.913099	0.0968295	0.908385
EIF2B5-65kDa	23.156	19.0145			3.86195	4.14147	3.87167		-0.0390877	0.240426	-0.0293677		1.02746	0.846495	1.02056
EIF2B5-65kDa	23.3307	19.2843			4.03666	4.31618	4.04638		0.13562	0.415134	0.14534		0.910278	0.74995	0.904166
				Sample 4	0	0	0	0	-3.90104	-3.90104	-3.90104	-3.90104	14.9393	14.9393	14.9393	14.9393	1.88411e-15	14.9393
					0	0	0		-3.90104	-3.90104	-3.90104		14.9393	14.9393	14.9393
					0	0	0		-3.90104	-3.90104	-3.90104		14.9393	14.9393	14.9393
Sample 5				Sample 5	0	0	0	0	-3.90104	-3.90104	-3.90104	-3.90104	14.9393	14.9393	14.9393	14.9393	1.88411e-15	14.9393
Sample 5					0	0	0		-3.90104	-3.90104	-3.90104		14.9393	14.9393	14.9393
Sample 5					0	0	0		-3.90104	-3.90104	-3.90104		14.9393	14.9393	14.9393
Sample 6				Sample 6	0	0	0	0	-3.90104	-3.90104	-3.90104	-3.90104	14.9393	14.9393	14.9393	14.9393	1.88411e-15	14.9393
Sample 6					0	0	0		-3.90104	-3.90104	-3.90104		14.9393	14.9393	14.9393
Sample 6					0	0	0		-3.90104	-3.90104	-3.90104		14.9393	14.9393	14.9393
Sample 7				Sample 7	0	0	0	0	-3.90104	-3.90104	-3.90104	-3.90104	14.9393	14.9393	14.9393	14.9393	1.88411e-15	14.9393
Sample 7					0	0	0		-3.90104	-3.90104	-3.90104		14.9393	14.9393	14.9393
Sample 7					0	0	0		-3.90104	-3.90104	-3.90104		14.9393	14.9393	14.9393
Sample 8				Sample 8	0	0	0	0	-3.90104	-3.90104	-3.90104	-3.90104	14.9393	14.9393	14.9393	14.9393	1.88411e-15	14.9393
Sample 8					0	0	0		-3.90104	-3.90104	-3.90104		14.9393	14.9393	14.9393
Sample 8					0	0	0		-3.90104	-3.90104	-3.90104		14.9393	14.9393	14.9393
Sample 9				Sample 9	0	0	0	0	-3.90104	-3.90104	-3.90104	-3.90104	14.9393	14.9393	14.9393	14.9393	1.88411e-15	14.9393
Sample 9					0	0	0		-3.90104	-3.90104	-3.90104		14.9393	14.9393	14.9393
Sample 9					0	0	0		-3.90104	-3.90104	-3.90104		14.9393	14.9393	14.9393
	Value	SD	t-test
control	1	0.0357182
EIF2B5-FL	1.07432	0.0674054	0.00571492
EIF2B5-65kDa	0.908385	0.0968295	0.0144757
Sample 4	14.9393	1.88411e-15	1.58687e-22
Sample 5	14.9393	1.88411e-15	1.58687e-22
Sample 6	14.9393	1.88411e-15	1.58687e-22
Sample 7	14.9393	1.88411e-15	1.58687e-22
Sample 8	14.9393	1.88411e-15	1.58687e-22
Sample 9	14.9393	1.88411e-15	1.58687e-22

## Sheet: chopII
	Cт
	target gene	internal control			ΔCт			ΔCт mean	ΔΔCт			ΔΔCт mean	RQ			RQ mean	SE	Realtime機器算的RQ mean
control	28.9493	18.8413		Sample 1	10.1079	10.0586	10.018	10.4821	-0.374186	-0.423516	-0.464103	1.18424e-15	1.29611	1.34119	1.37946	1.04141	0.295918	1
control	29.2139	18.8907			10.3725	10.3232	10.2826		-0.109612	-0.158942	-0.199529		1.07894	1.11647	1.14832
control	29.9465	18.9312			11.1052	11.0558	11.0153		0.623046	0.573716	0.533129		0.649299	0.671884	0.691054
EIF2B5-FL	29.5318	19.5816		Sample 2	9.95025	9.90608	10.0974	10.1135	-0.531883	-0.57605	-0.384764	-0.368593	1.44582	1.49076	1.30565	1.29986	0.157208	1.29109
EIF2B5-FL	29.8689	19.6257			10.2874	10.2432	10.4345		-0.194763	-0.23893	-0.0476443		1.14454	1.18012	1.03358
EIF2B5-FL	29.5816	19.4344			10.0001	9.95588	10.1472		-0.482083	-0.52625	-0.334964		1.39676	1.44018	1.26135
EIF2B5-65kDa	28.3223	19.2941		Sample 3	9.02819	9.30771	9.03791	9.20757	-1.45394	-1.17443	-1.44422	-1.27456	2.73955	2.25703	2.72116	2.70882	1.30048	2.41926
EIF2B5-65kDa	27.6012	19.0145			8.30718	8.58669	8.3169		-2.17495	-1.89544	-2.16523		4.51571	3.72035	4.48539
EIF2B5-65kDa	29.2922	19.2843			9.9981	10.2776	10.0078		-0.484029	-0.204515	-0.474309		1.39864	1.1523	1.38925
				Sample 4	0	0	0	0	-10.4821	-10.4821	-10.4821	-10.4821	1430.33	1430.33	1430.33	1430.33	2.41166e-13	1430.33
					0	0	0		-10.4821	-10.4821	-10.4821		1430.33	1430.33	1430.33
					0	0	0		-10.4821	-10.4821	-10.4821		1430.33	1430.33	1430.33
Sample 5				Sample 5	0	0	0	0	-10.4821	-10.4821	-10.4821	-10.4821	1430.33	1430.33	1430.33	1430.33	2.41166e-13	1430.33
Sample 5					0	0	0		-10.4821	-10.4821	-10.4821		1430.33	1430.33	1430.33
Sample 5					0	0	0		-10.4821	-10.4821	-10.4821		1430.33	1430.33	1430.33
Sample 6				Sample 6	0	0	0	0	-10.4821	-10.4821	-10.4821	-10.4821	1430.33	1430.33	1430.33	1430.33	2.41166e-13	1430.33
Sample 6					0	0	0		-10.4821	-10.4821	-10.4821		1430.33	1430.33	1430.33
Sample 6					0	0	0		-10.4821	-10.4821	-10.4821		1430.33	1430.33	1430.33
Sample 7				Sample 7	0	0	0	0	-10.4821	-10.4821	-10.4821	-10.4821	1430.33	1430.33	1430.33	1430.33	2.41166e-13	1430.33
Sample 7					0	0	0		-10.4821	-10.4821	-10.4821		1430.33	1430.33	1430.33
Sample 7					0	0	0		-10.4821	-10.4821	-10.4821		1430.33	1430.33	1430.33
Sample 8				Sample 8	0	0	0	0	-10.4821	-10.4821	-10.4821	-10.4821	1430.33	1430.33	1430.33	1430.33	2.41166e-13	1430.33
Sample 8					0	0	0		-10.4821	-10.4821	-10.4821		1430.33	1430.33	1430.33
Sample 8					0	0	0		-10.4821	-10.4821	-10.4821		1430.33	1430.33	1430.33
Sample 9				Sample 9	0	0	0	0	-10.4821	-10.4821	-10.4821	-10.4821	1430.33	1430.33	1430.33	1430.33	2.41166e-13	1430.33
Sample 9					0	0	0		-10.4821	-10.4821	-10.4821		1430.33	1430.33	1430.33
Sample 9					0	0	0		-10.4821	-10.4821	-10.4821		1430.33	1430.33	1430.33
	Value	SD	t-test
control	1	0.295918
EIF2B5-FL	1.29109	0.157208	0.0194518
EIF2B5-65kDa	2.41926	1.30048	0.00235567
Sample 4	1430.33	2.41166e-13	2.88157e-31
Sample 5	1430.33	2.41166e-13	2.88157e-31
Sample 6	1430.33	2.41166e-13	2.88157e-31
Sample 7	1430.33	2.41166e-13	2.88157e-31
Sample 8	1430.33	2.41166e-13	2.88157e-31
Sample 9	1430.33	2.41166e-13	2.88157e-31

## Sheet: perk
	Cт
	target gene	internal control			ΔCт			ΔCт mean	ΔΔCт			ΔΔCт mean	RQ			RQ mean	SE	Realtime機器算的RQ mean
control	29.0895	18.8413		Sample 1	10.2482	10.1988	10.1583	10.2552	-0.007047	-0.056377	-0.096964	5.92119e-16	1.0049	1.03985	1.06952	1.00176	0.0623725	1
control	29.0864	18.8907			10.245	10.1957	10.1551		-0.010179	-0.059509	-0.100096		1.00708	1.04211	1.07184
control	29.253	18.9312			10.4117	10.3624	10.3218		0.156473	0.107143	0.066556		0.897216	0.928425	0.954915
EIF2B5-FL	29.0173	19.5816		Sample 2	9.4357	9.39154	9.58282	9.46604	-0.81952	-0.863687	-0.672401	-0.789185	1.76482	1.81968	1.59372	1.73216	0.125029	1.7281
EIF2B5-FL	29.0799	19.6257			9.49837	9.4542	9.64549		-0.756852	-0.801019	-0.609733		1.6898	1.74233	1.52598
EIF2B5-FL	28.9426	19.4344			9.36109	9.31692	9.50821		-0.894136	-0.938303	-0.747017		1.8585	1.91627	1.67832
EIF2B5-65kDa	28.9832	19.2941		Sample 3	9.68917	9.96868	9.69889	9.82162	-0.566057	-0.286543	-0.556337	-0.433605	1.48047	1.21971	1.47053	1.35686	0.135566	1.3506
EIF2B5-65kDa	28.9799	19.0145			9.6858	9.96531	9.69552		-0.569424	-0.28991	-0.559704		1.48393	1.22256	1.47397
EIF2B5-65kDa	29.0947	19.2843			9.80065	10.0802	9.81037		-0.454569	-0.175055	-0.444849		1.37037	1.12901	1.36117
				Sample 4	0	0	0	0	-10.2552	-10.2552	-10.2552	-10.2552	1222.17	1222.17	1222.17	1222.17	2.41166e-13	1222.17
					0	0	0		-10.2552	-10.2552	-10.2552		1222.17	1222.17	1222.17
					0	0	0		-10.2552	-10.2552	-10.2552		1222.17	1222.17	1222.17
Sample 5				Sample 5	0	0	0	0	-10.2552	-10.2552	-10.2552	-10.2552	1222.17	1222.17	1222.17	1222.17	2.41166e-13	1222.17
Sample 5					0	0	0		-10.2552	-10.2552	-10.2552		1222.17	1222.17	1222.17
Sample 5					0	0	0		-10.2552	-10.2552	-10.2552		1222.17	1222.17	1222.17
Sample 6				Sample 6	0	0	0	0	-10.2552	-10.2552	-10.2552	-10.2552	1222.17	1222.17	1222.17	1222.17	2.41166e-13	1222.17
Sample 6					0	0	0		-10.2552	-10.2552	-10.2552		1222.17	1222.17	1222.17
Sample 6					0	0	0		-10.2552	-10.2552	-10.2552		1222.17	1222.17	1222.17
Sample 7				Sample 7	0	0	0	0	-10.2552	-10.2552	-10.2552	-10.2552	1222.17	1222.17	1222.17	1222.17	2.41166e-13	1222.17
Sample 7					0	0	0		-10.2552	-10.2552	-10.2552		1222.17	1222.17	1222.17
Sample 7					0	0	0		-10.2552	-10.2552	-10.2552		1222.17	1222.17	1222.17
Sample 8				Sample 8	0	0	0	0	-10.2552	-10.2552	-10.2552	-10.2552	1222.17	1222.17	1222.17	1222.17	2.41166e-13	1222.17
Sample 8					0	0	0		-10.2552	-10.2552	-10.2552		1222.17	1222.17	1222.17
Sample 8					0	0	0		-10.2552	-10.2552	-10.2552		1222.17	1222.17	1222.17
Sample 9				Sample 9	0	0	0	0	-10.2552	-10.2552	-10.2552	-10.2552	1222.17	1222.17	1222.17	1222.17	2.41166e-13	1222.17
Sample 9					0	0	0		-10.2552	-10.2552	-10.2552		1222.17	1222.17	1222.17
Sample 9					0	0	0		-10.2552	-10.2552	-10.2552		1222.17	1222.17	1222.17
	Value	SD	t-test
control	1	0.0623725
EIF2B5-FL	1.7281	0.125029	1.53747e-09
EIF2B5-65kDa	1.3506	0.135566	8.43209e-06
Sample 4	1222.17	2.41166e-13	3.95341e-36
Sample 5	1222.17	2.41166e-13	3.95341e-36
Sample 6	1222.17	2.41166e-13	3.95341e-36
Sample 7	1222.17	2.41166e-13	3.95341e-36
Sample 8	1222.17	2.41166e-13	3.95341e-36
Sample 9	1222.17	2.41166e-13	3.95341e-36
